# Supplementary material for: Reported patterns of pregnancy termination from Demographic and Health Surveys
Source: PubMed Central journal article supplement (PMC6699730; doi:10.1371/journal.pone.0221178), 2019-08-19
Supplement: pone.0221178.s001.pdf [file pone.0221178.s001.pdf]

A. Contribution of categories

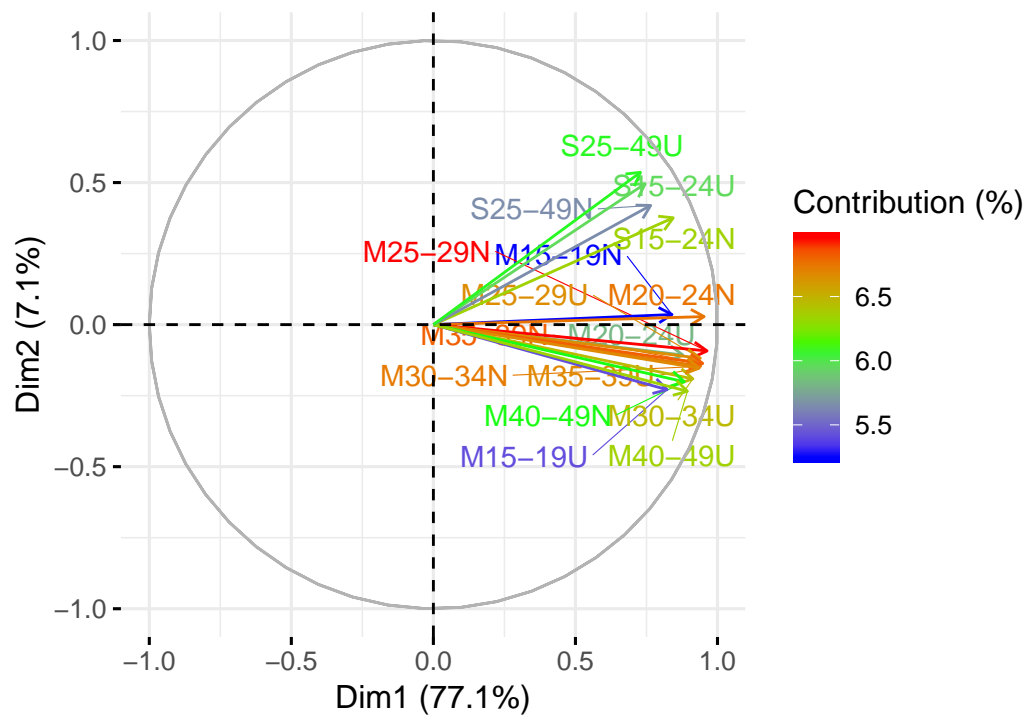

B. Grouped categories

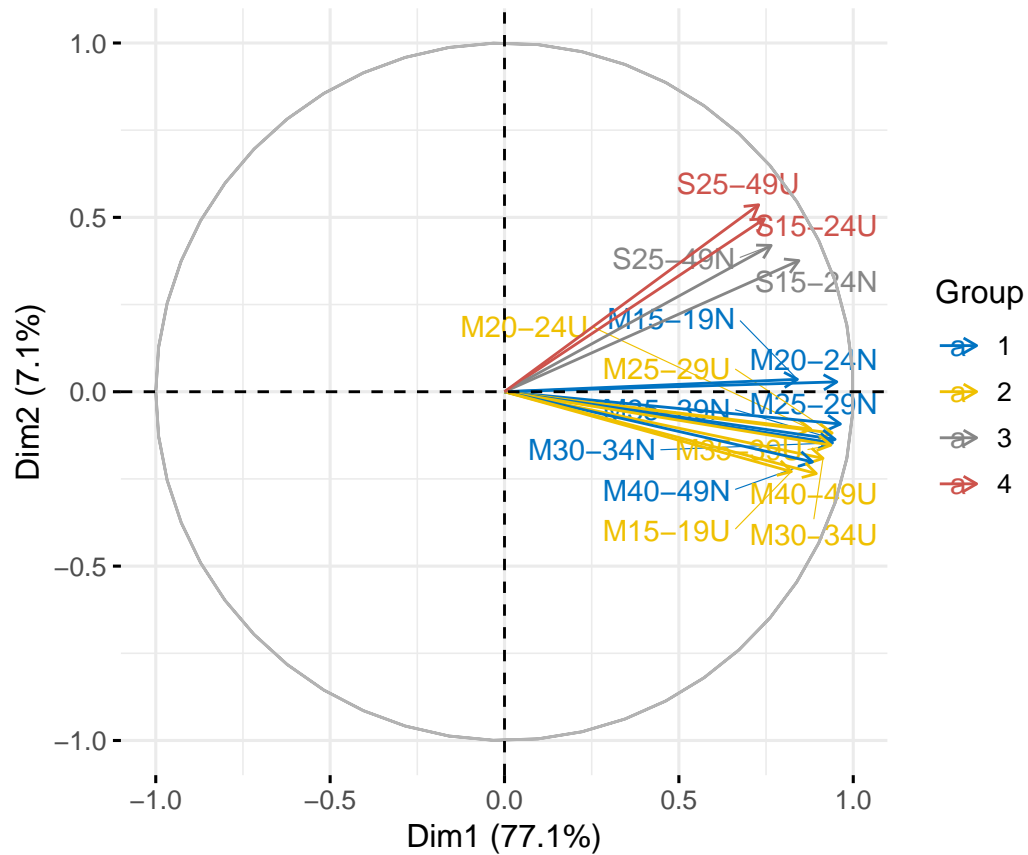

Note: The category name has the following structure: The first letter is the union status (M=in-union or S=not-in-union). Then, the age-group. The last letter refers to using (U) or not using (N) contraceptives.
