# Supplementary material for: Reported patterns of pregnancy termination from Demographic and Health Surveys
Source: PubMed Central journal article supplement (PMC6699730; doi:10.1371/journal.pone.0221178), 2019-08-19

Terminated pregnancies per thousand women-years

Percentage of terminated pregnancies

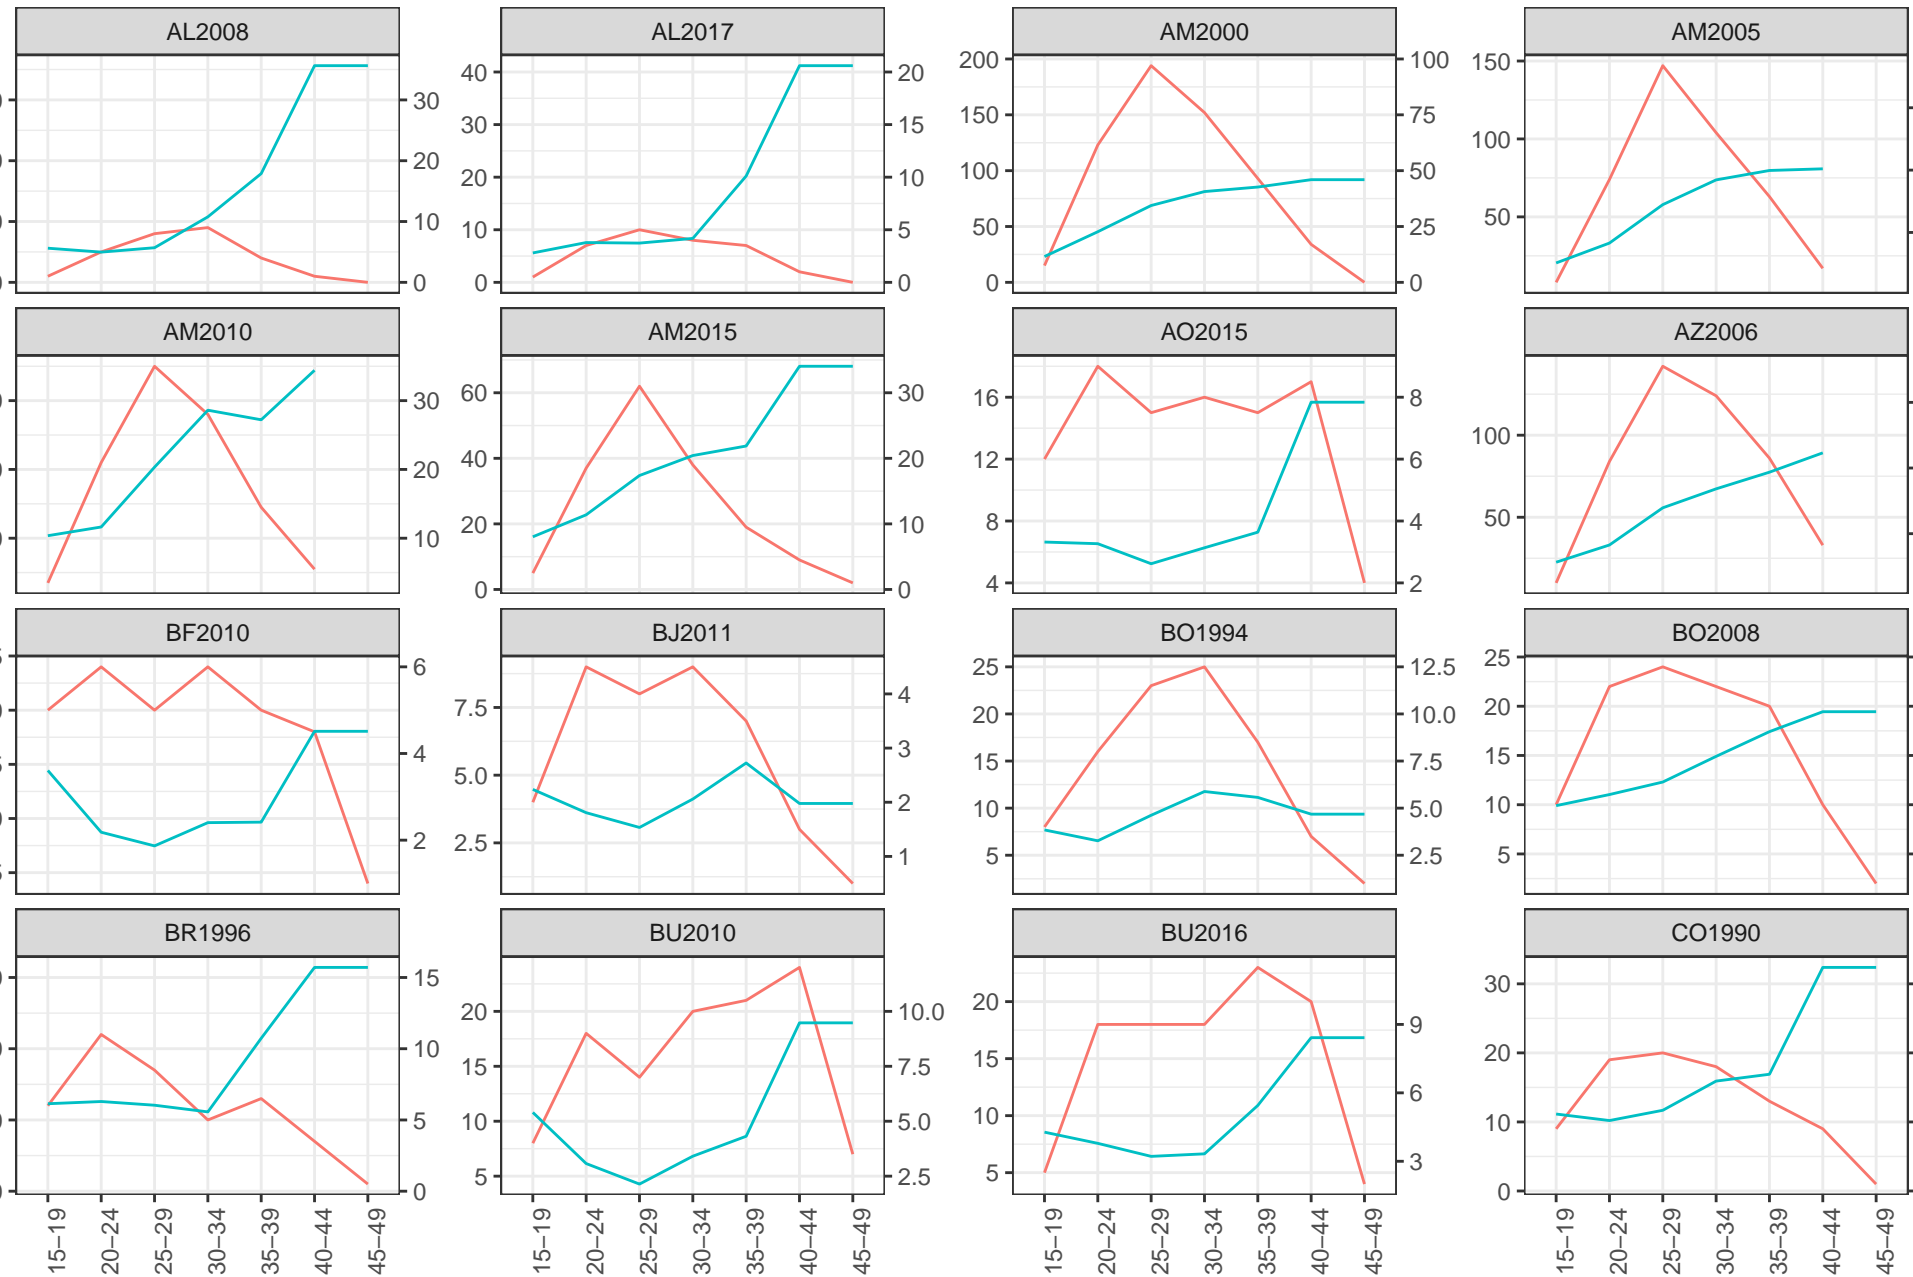

— ASTR — T

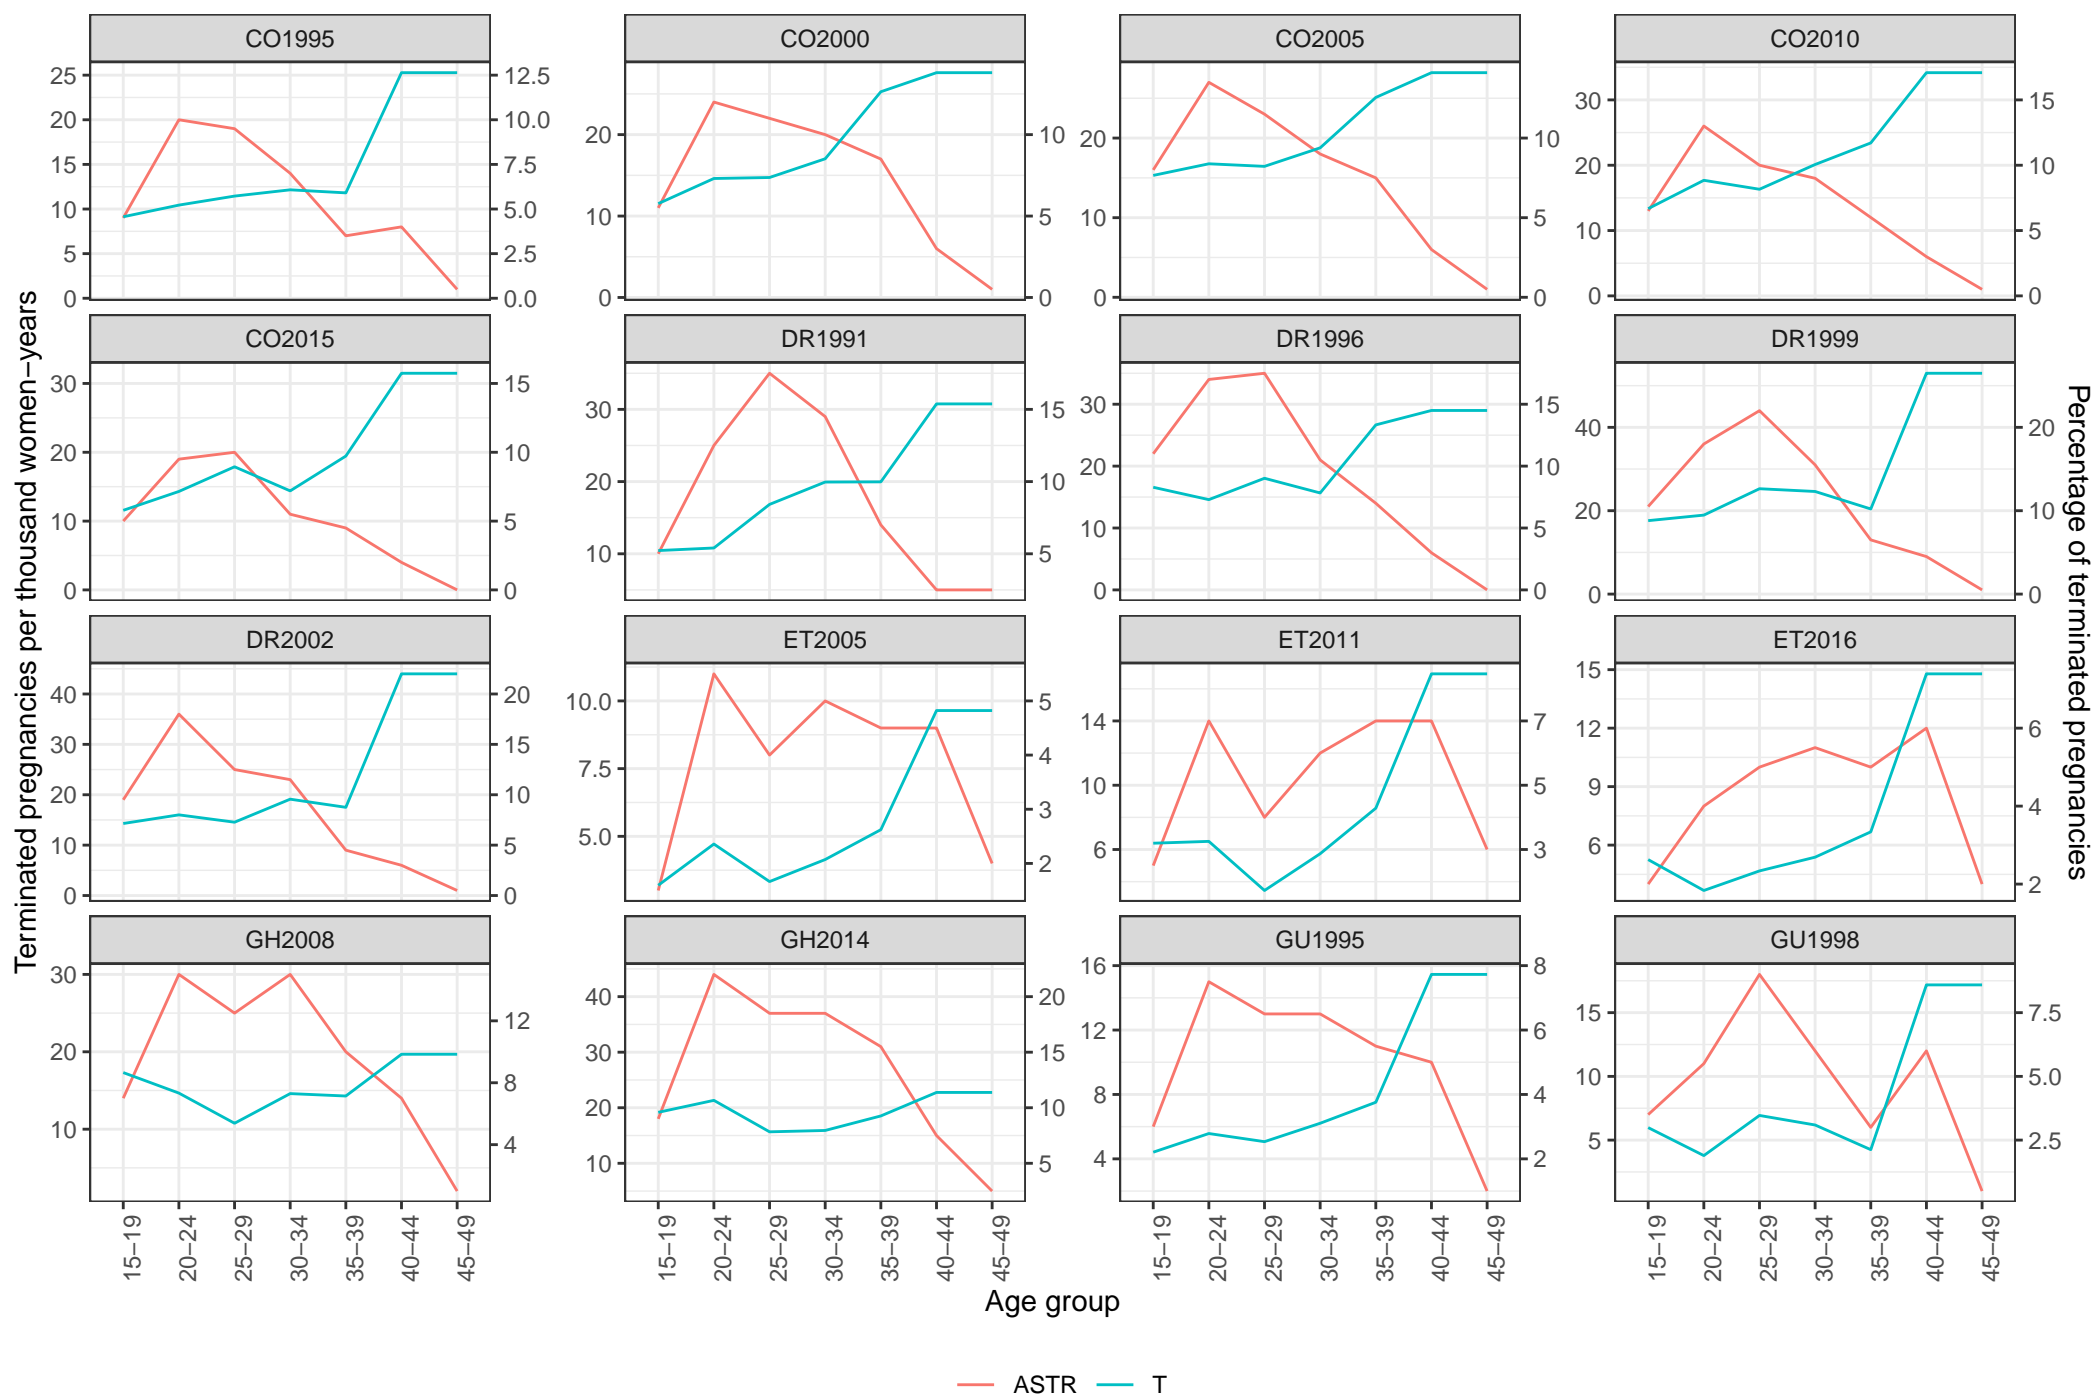

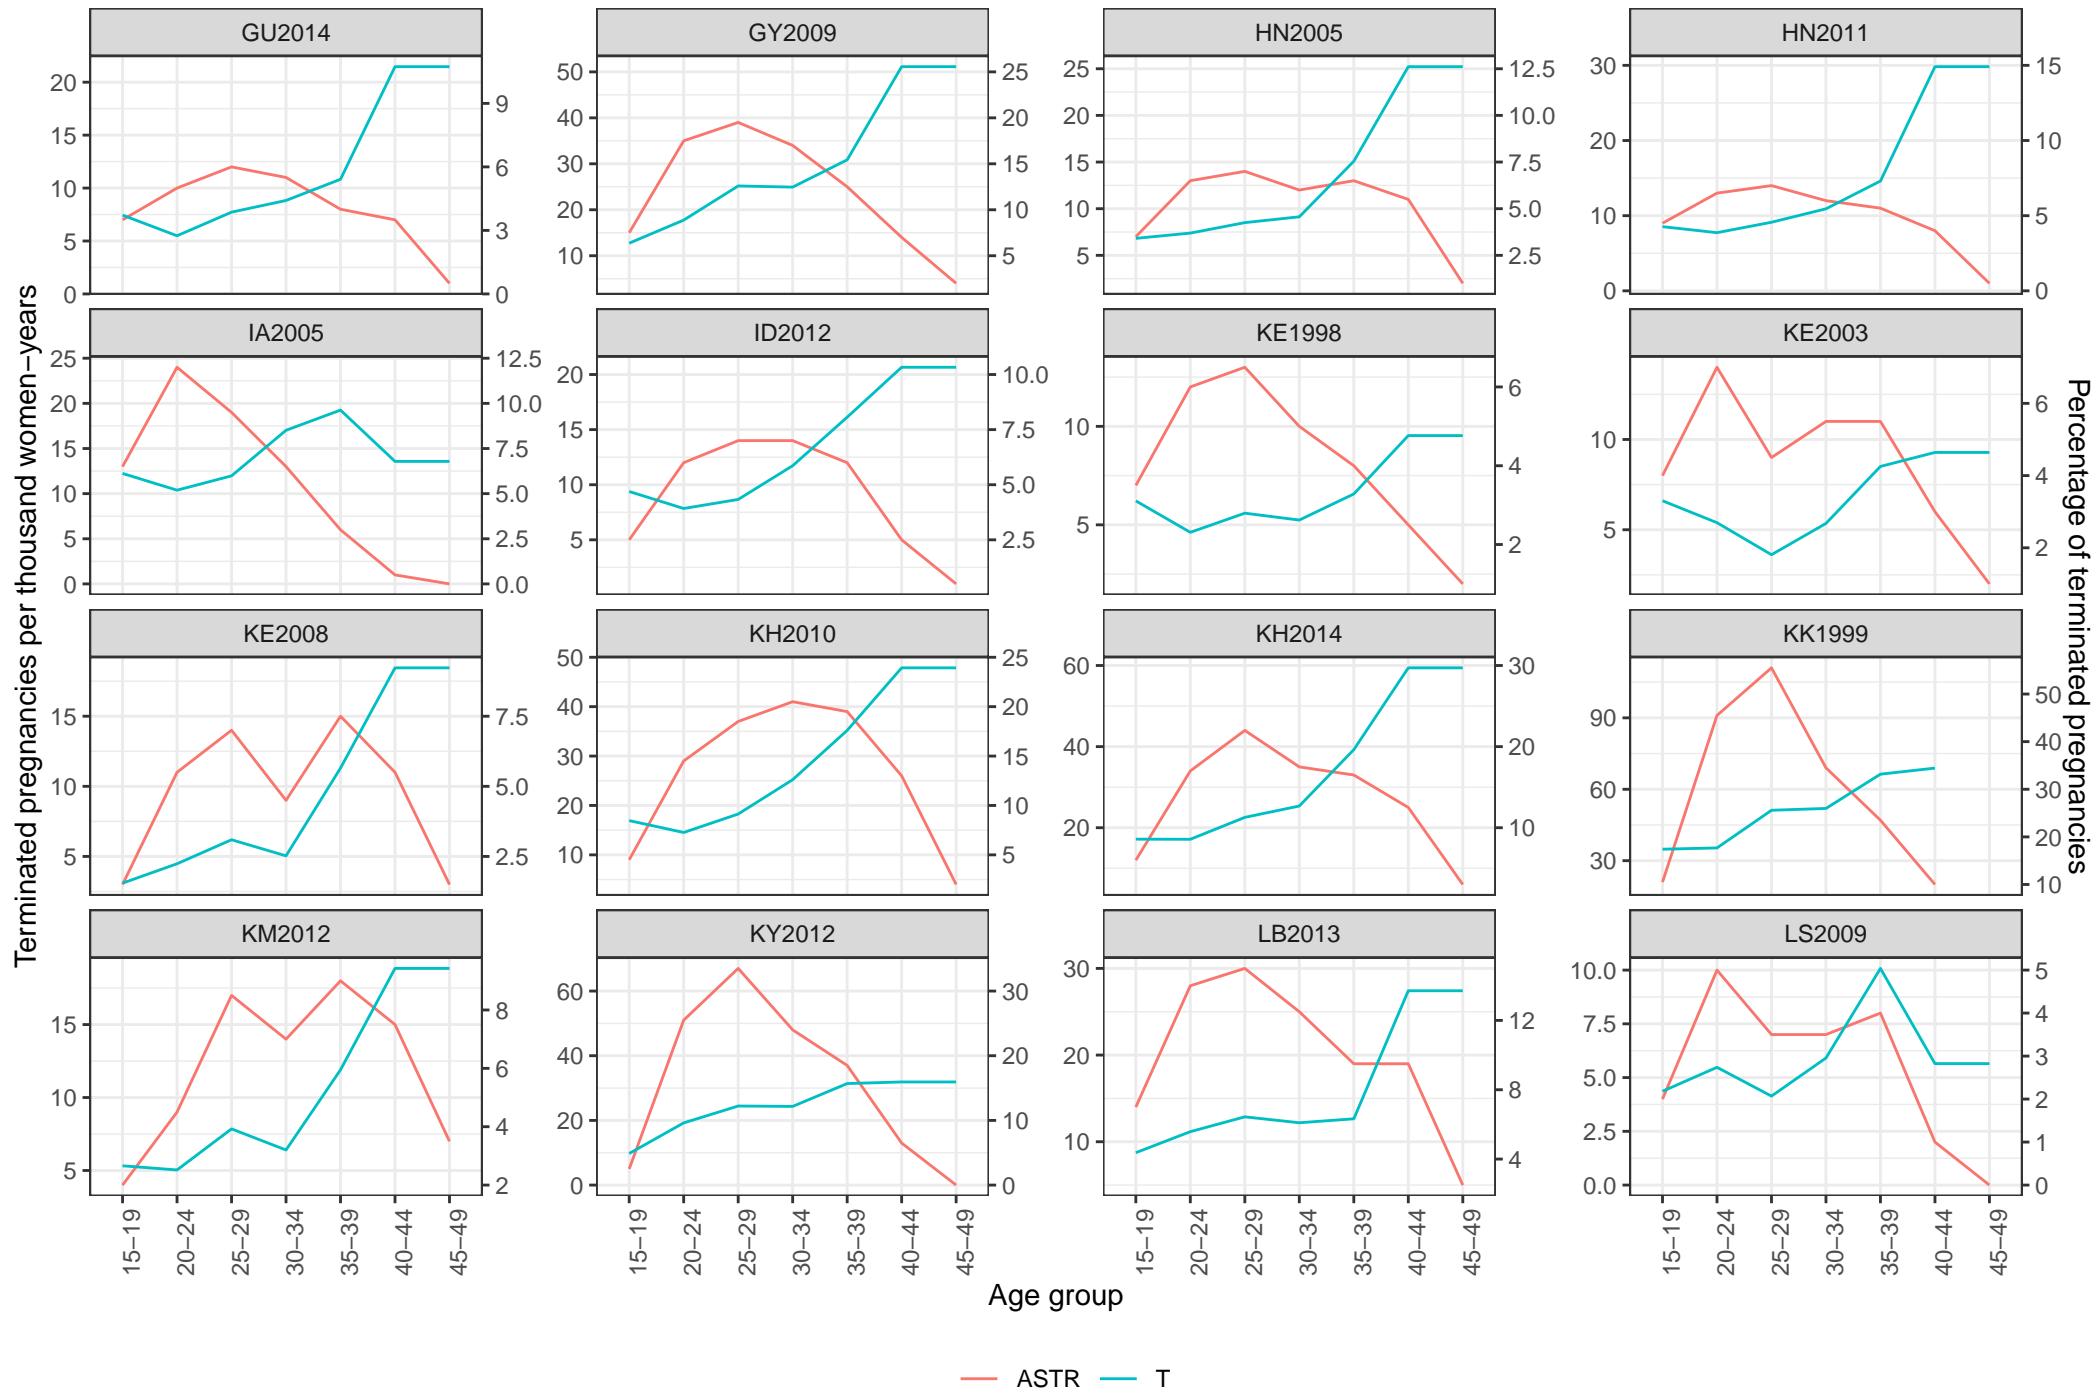

Terminated pregnancies per thousand women-years

Percentage of terminated pregnancies

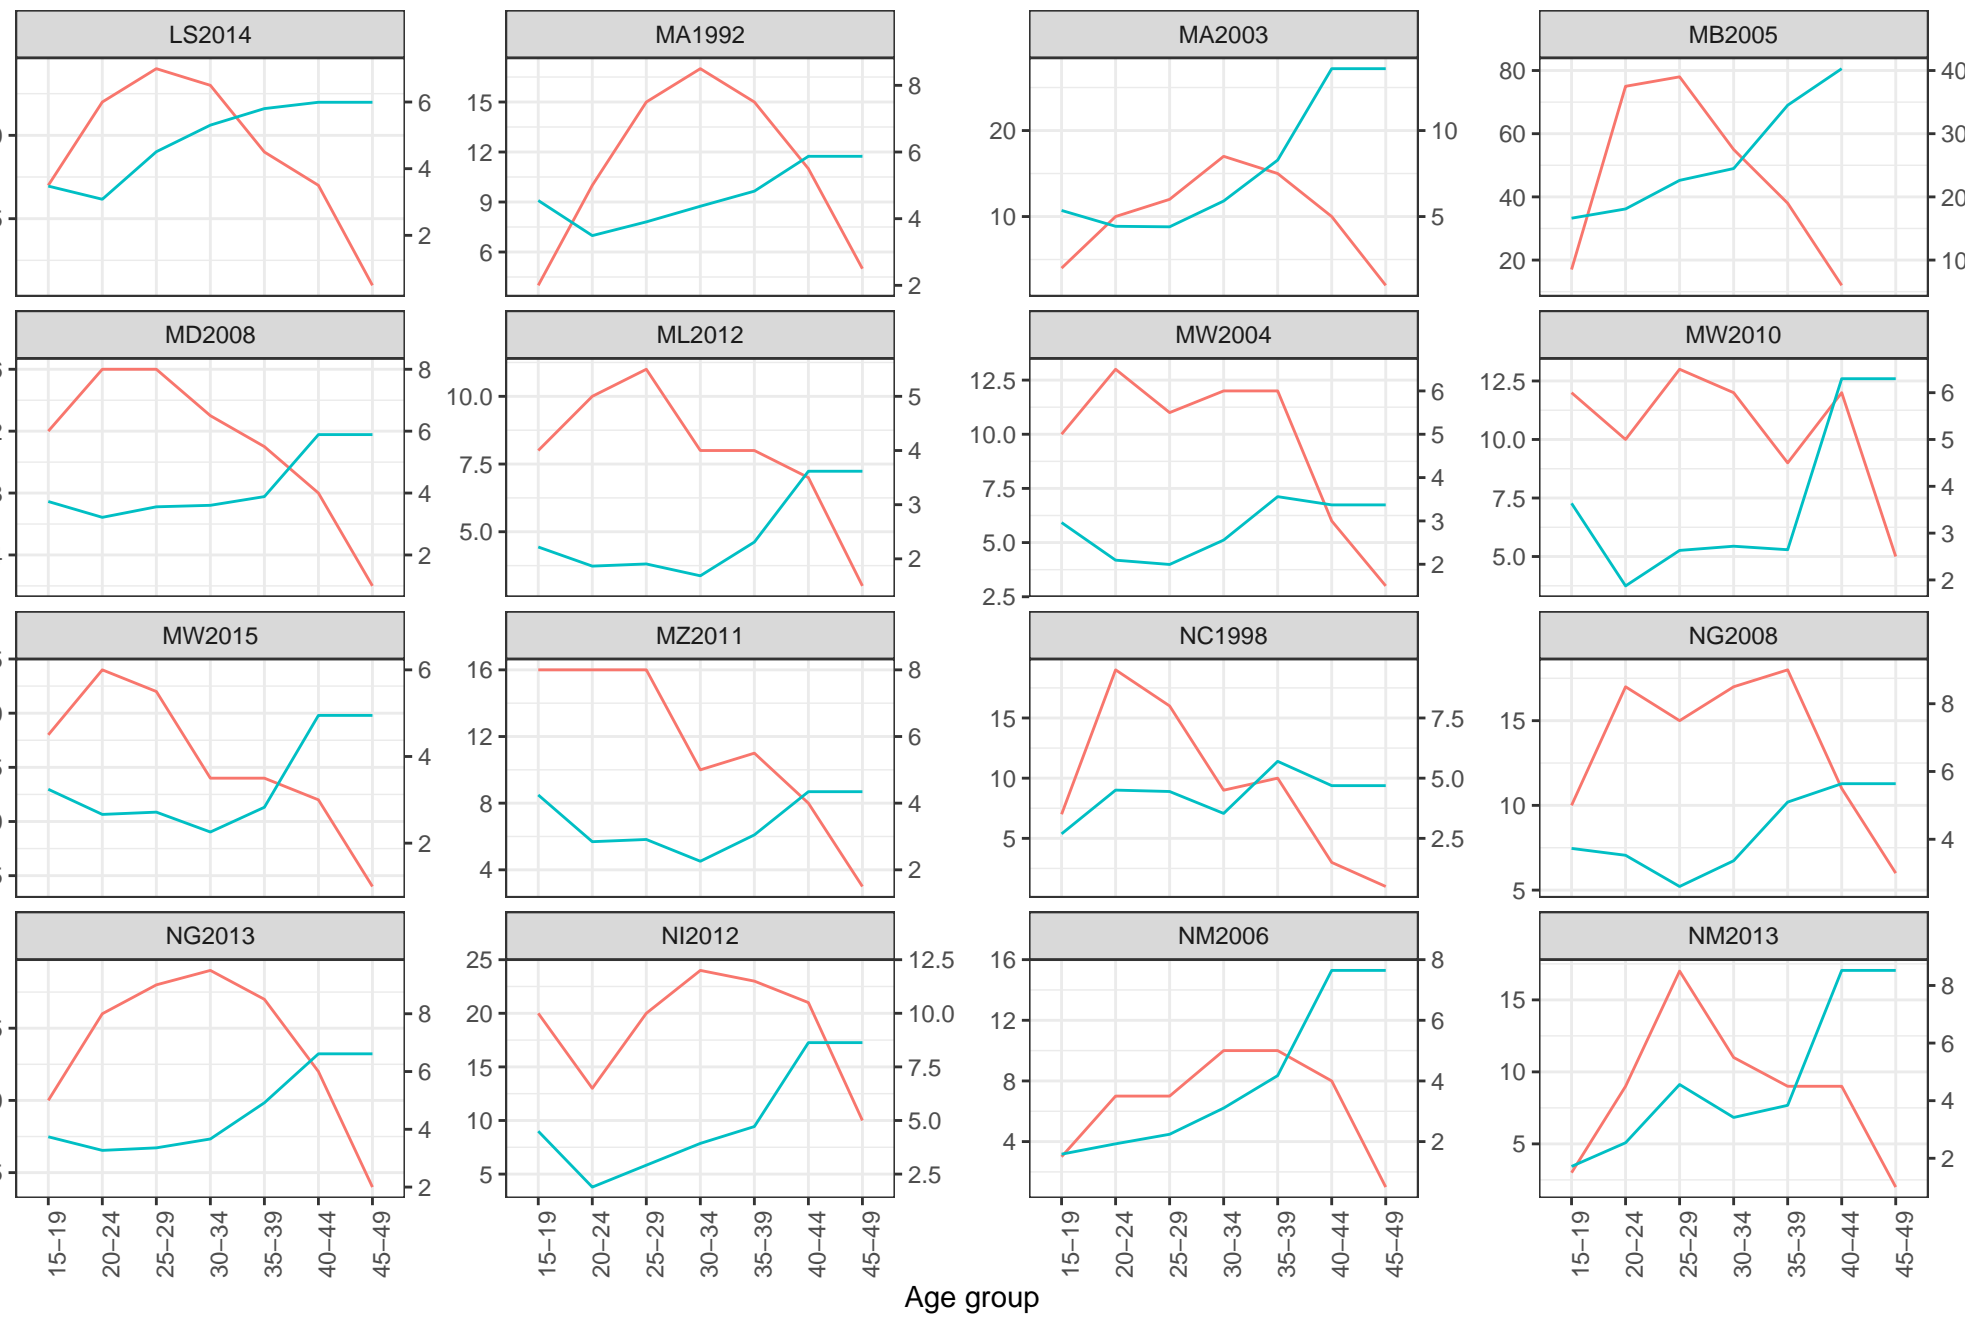

— ASTR — T

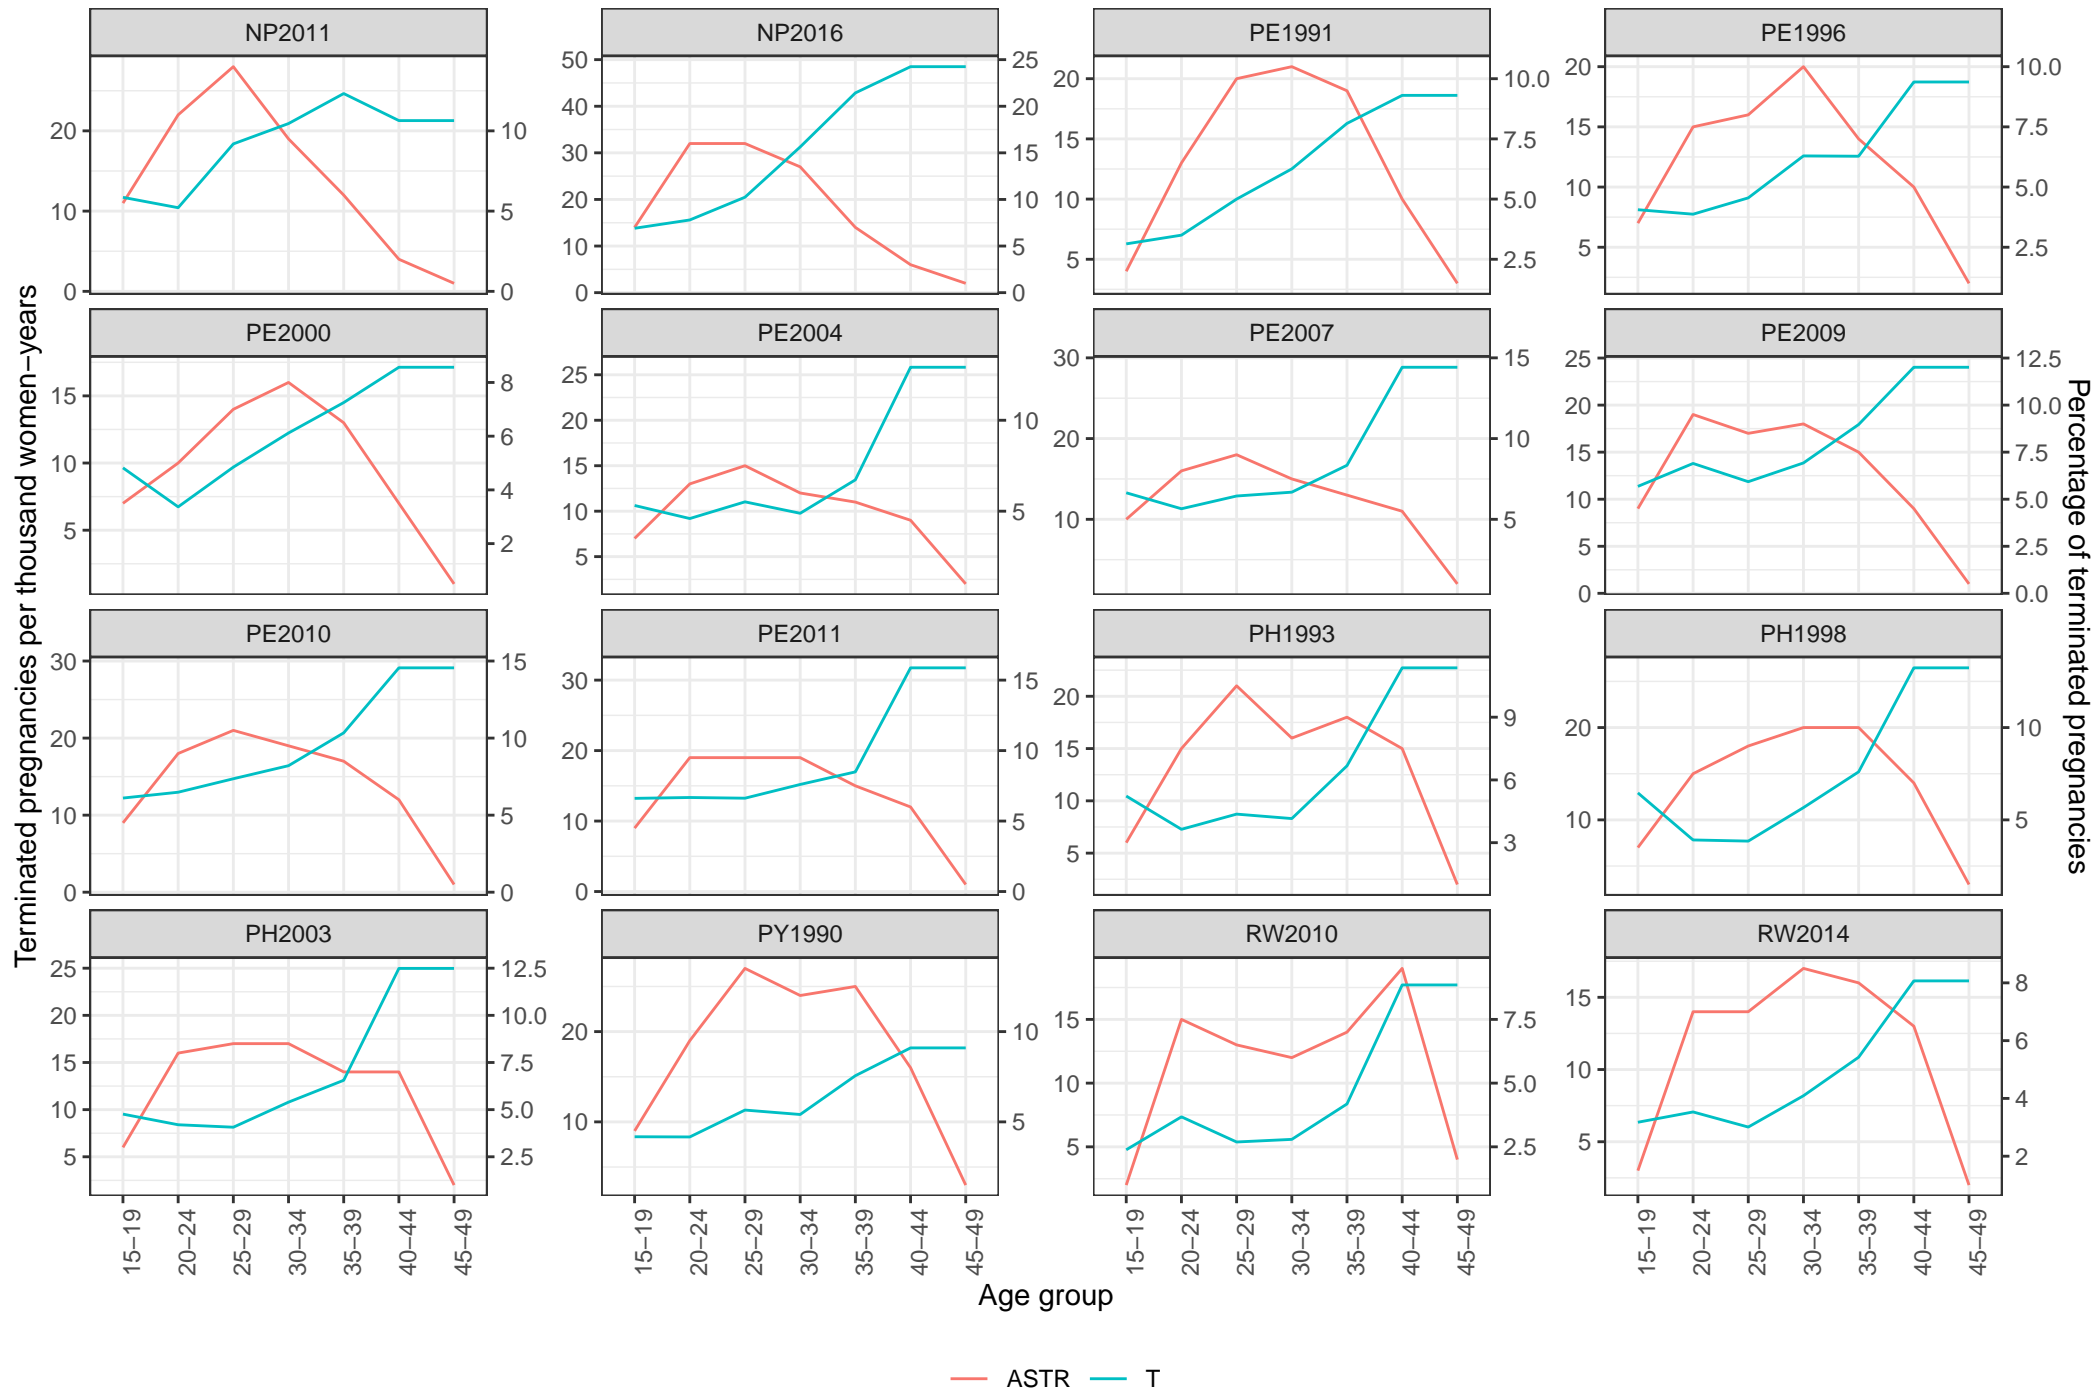

Terminated pregnancies per thousand women-years

Percentage of terminated pregnancies

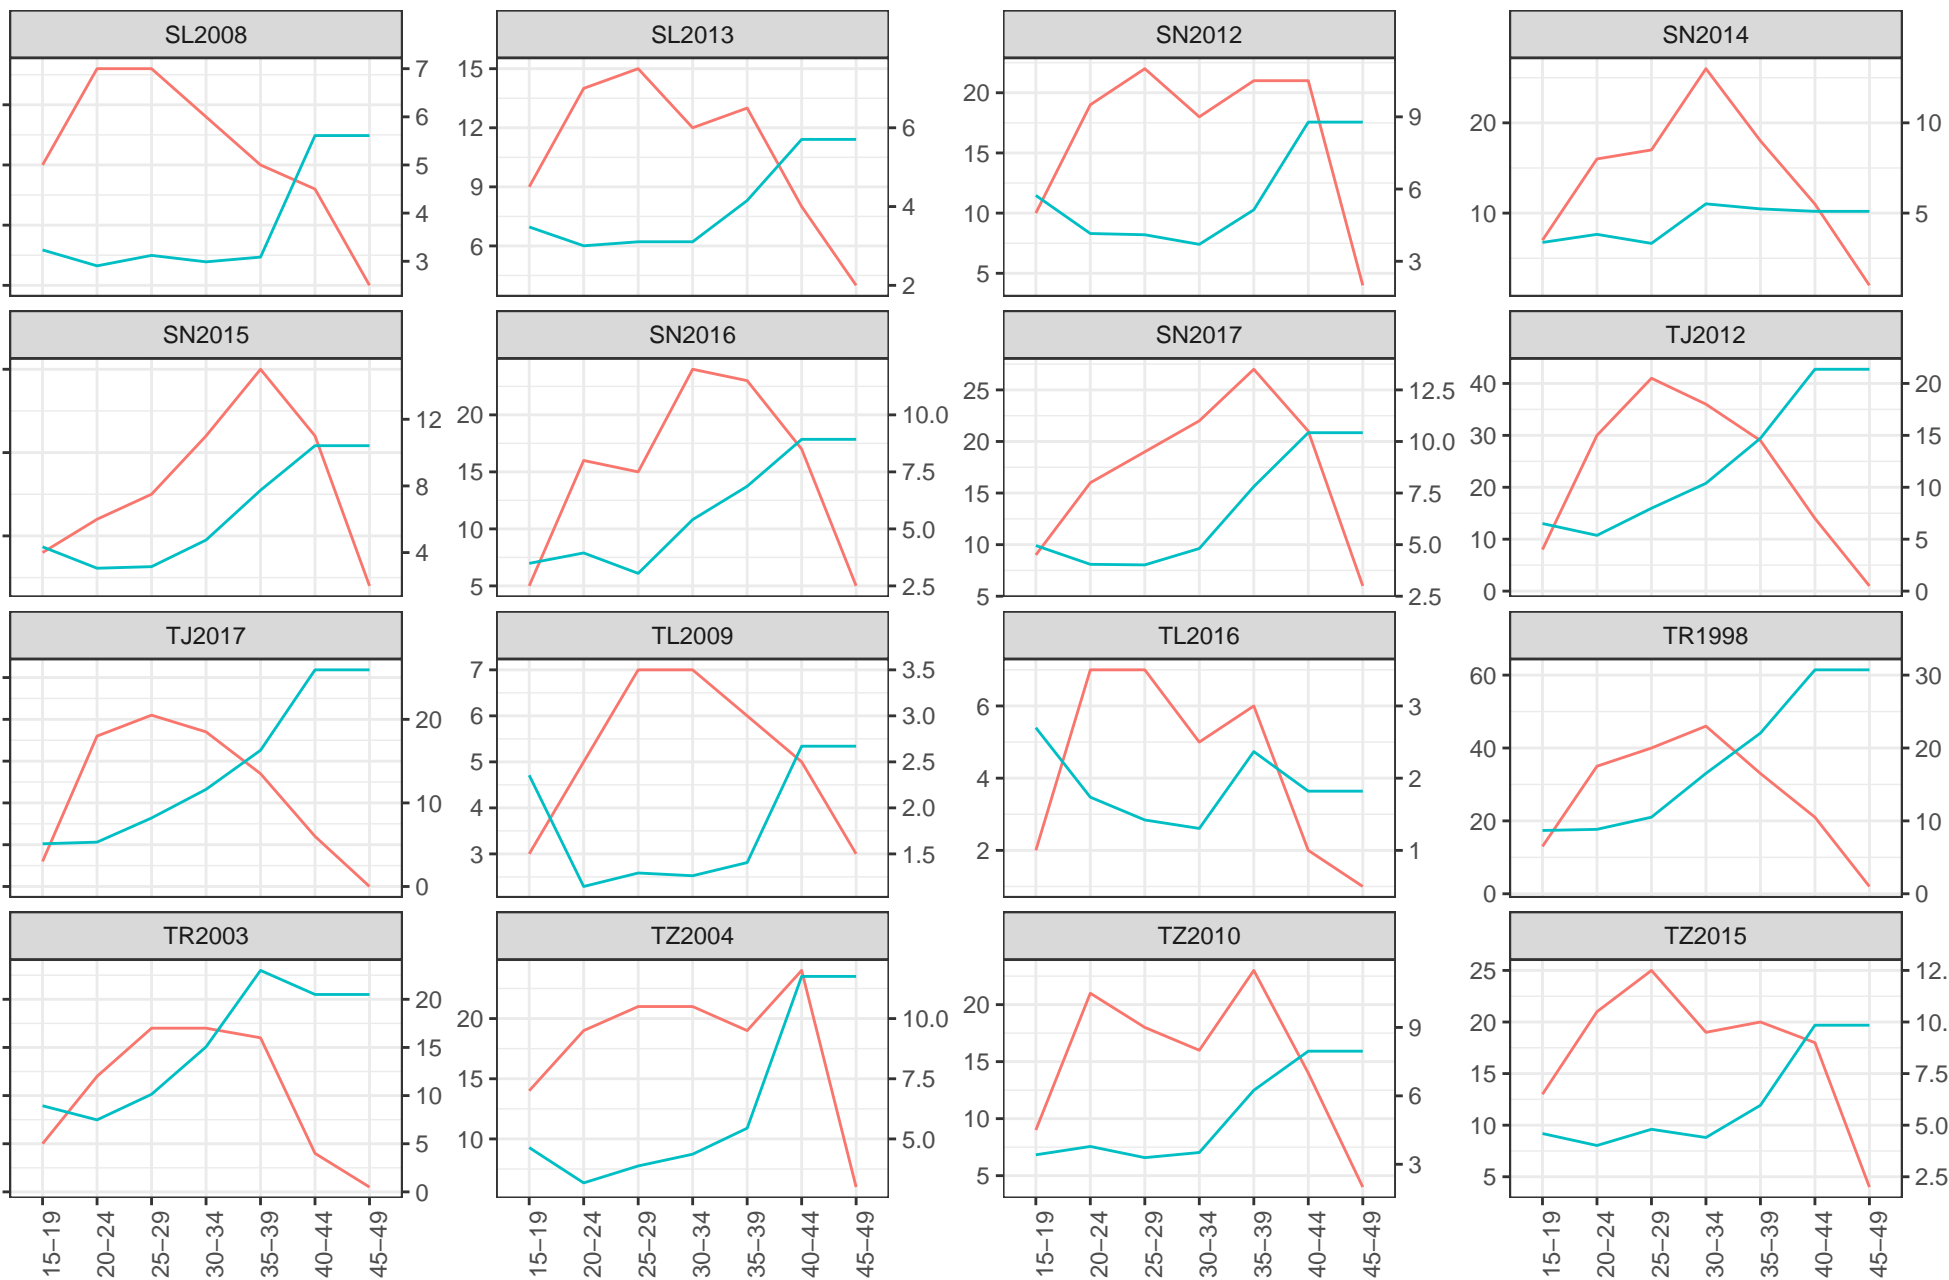

— ASTR — T

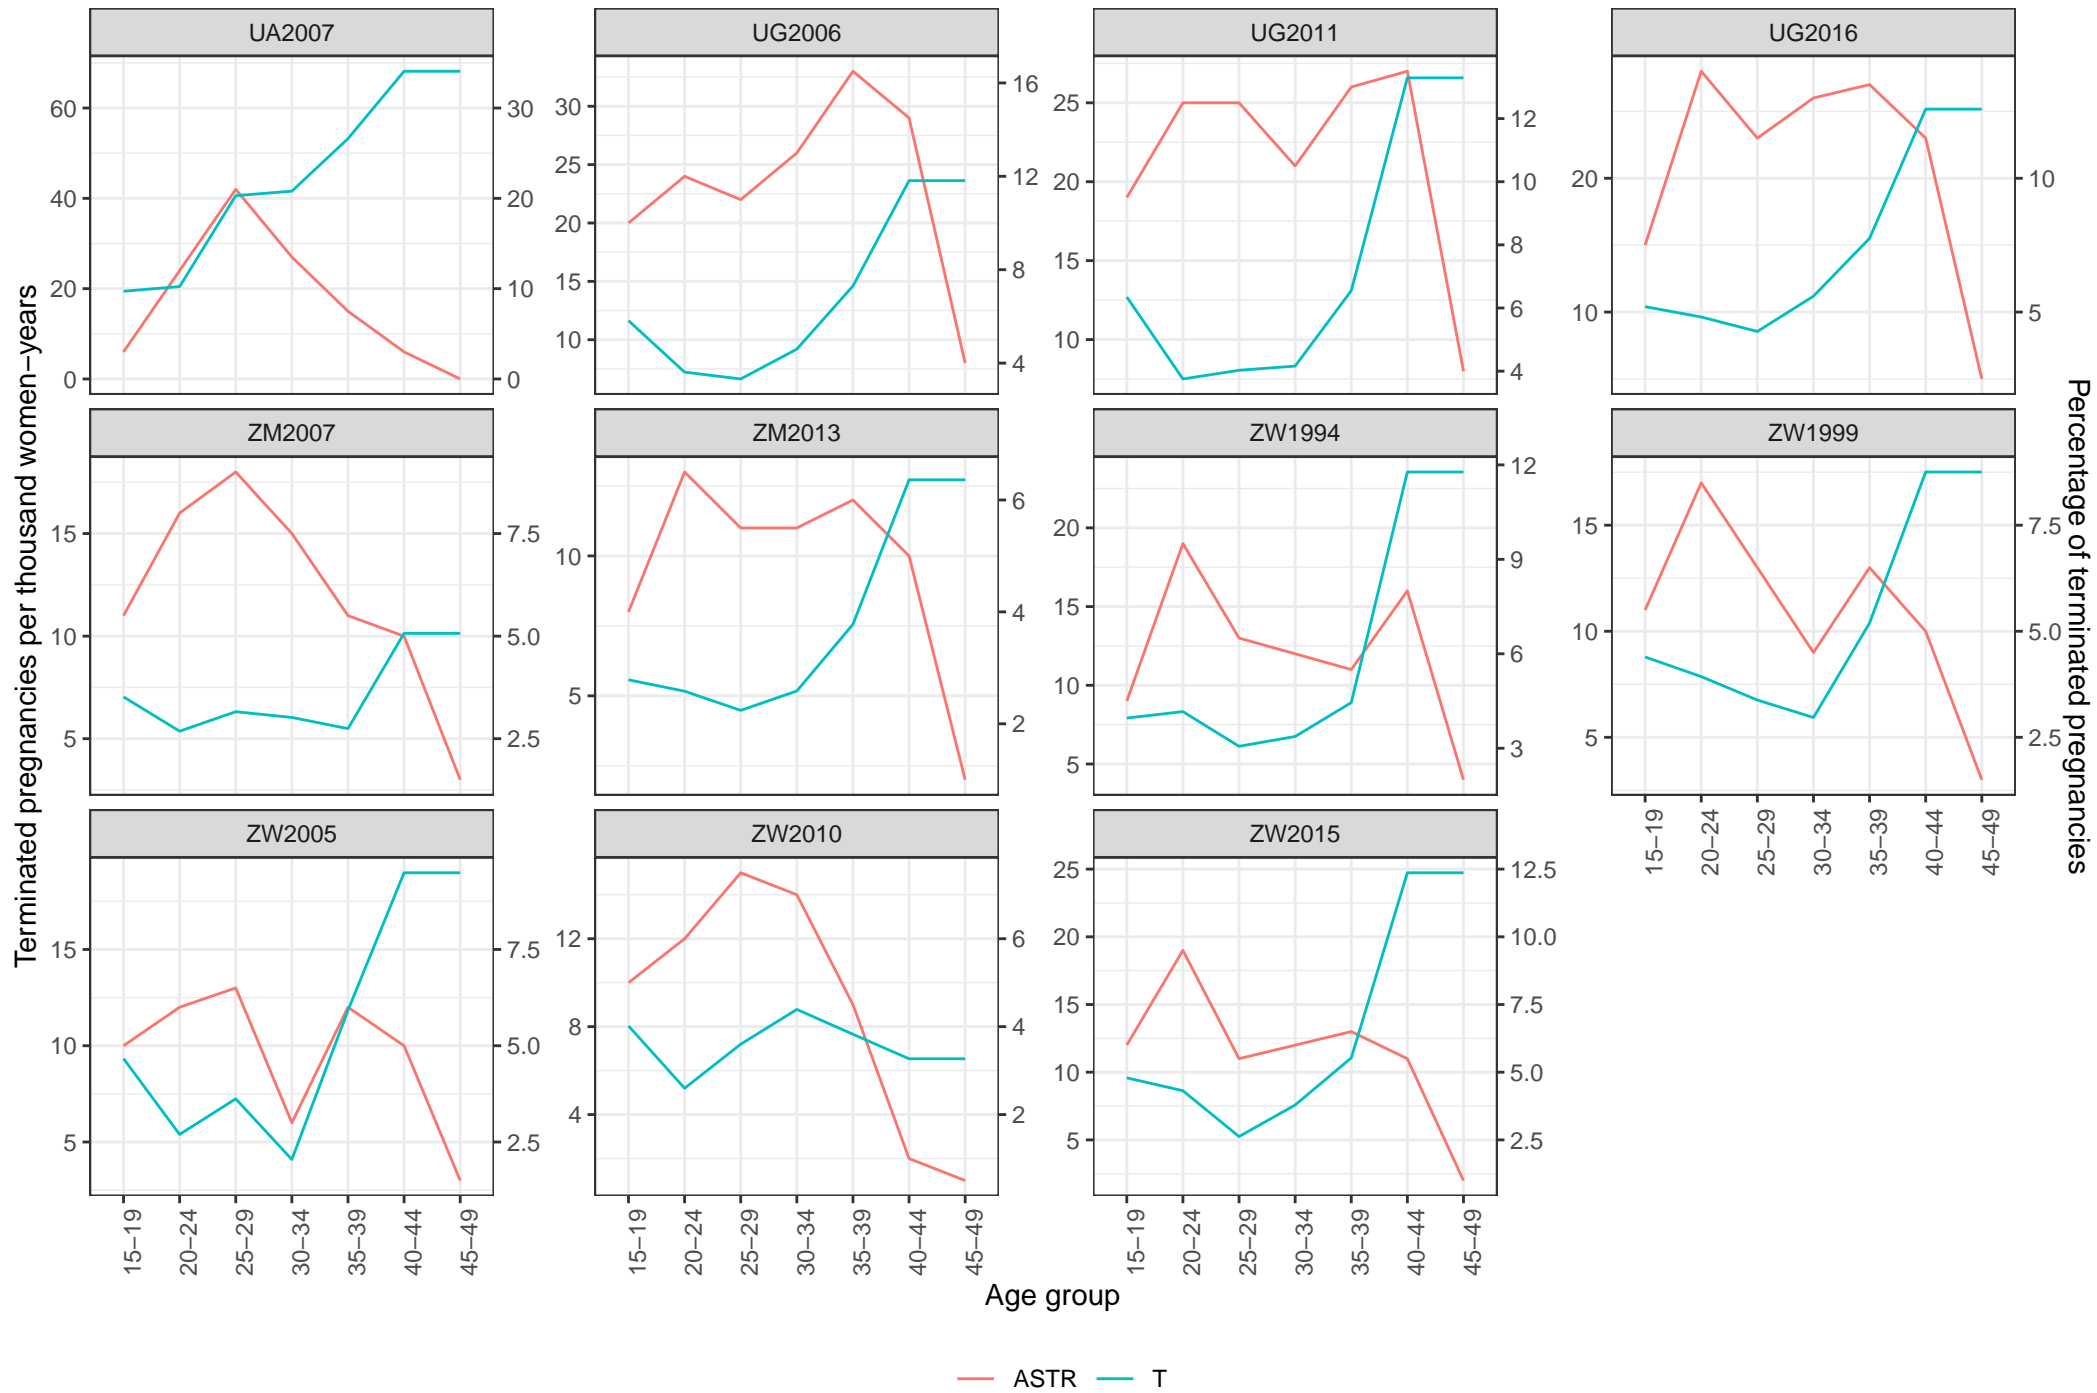

Supplement: pone.0221178.s002.pdf [file pone.0221178.s002.pdf]
