# Supplementary material for: Reported patterns of pregnancy termination from Demographic and Health Surveys
Source: PubMed Central journal article supplement (PMC6699730; doi:10.1371/journal.pone.0221178), 2019-08-19
Supplement: pone.0221178.s003.pdf [file pone.0221178.s003.pdf]

| Code          | Survey            | cal1 | cal2 | cal3 |
|---------------|-------------------|------|------|------|
| <b>Africa</b> |                   |      |      |      |
| AO            | Angola 2015       | X    | X    |      |
| BF            | Burkina Faso 2010 | X    | X    |      |
| BJ            | Benin 2011        | X    | X    |      |
| BU            | Burundi 2010      | X    | X    |      |
| BU            | Burundi 2016      | X    | X    |      |
| ET            | Ethiopia 2005     | X    | X    | X    |
| ET            | Ethiopia 2011     | X    |      |      |
| ET            | Ethiopia 2016     | X    | X    |      |
| GH            | Ghana 2008        | X    |      |      |
| GH            | Ghana 2014        | X    | X    |      |
| KE            | Kenya 1998        | X    | X    | X    |
| KE            | Kenya 2003        | X    | X    | X    |
| KE            | Kenya 2008        | X    |      |      |
| KM            | Comoros 2012      | X    | X    |      |
| LB            | Liberia 2013      | X    | X    |      |
| LS            | Lesotho 2009      | X    |      |      |
| LS            | Lesotho 2014      | X    | X    |      |
| MA            | Morocco 1992      | X    | X    | X    |
| MA            | Morocco 2003      | X    | X    |      |
| MD            | Madagascar 2008   | X    |      |      |
| ML            | Mali 2012         | X    | X    |      |
| MW            | Malawi 2004       | X    | X    | X    |
| MW            | Malawi 2010       | X    |      |      |
| MW            | Malawi 2015       | X    | X    |      |
| MZ            | Mozambique 2011   | X    | X    |      |
| NG            | Nigeria 2008      | X    |      |      |
| NG            | Nigeria 2013      | X    | X    |      |
| NI            | Niger 2012        | X    | X    |      |
| NM            | Namibia 2006      | X    |      |      |
| RW            | Rwanda 2010       | X    | X    |      |
| RW            | Rwanda 2014       | X    | X    |      |
| SL            | Sierra Leone 2008 | X    |      |      |
| SL            | Sierra Leone 2013 | X    | X    |      |
| SN            | Senegal 2012      | X    | X    |      |
| SN            | Senegal 2014      | X    | X    |      |
| SN            | Senegal 2015      | X    | X    |      |
| SN            | Senegal 2016      | X    | X    |      |
| SN            | Senegal 2017      | X    | X    |      |
| TZ            | Tanzania 2004     | X    | X    | X    |
| TZ            | Tanzania 2010     | X    |      |      |
| TZ            | Tanzania 2015     | X    | X    |      |
| UG            | Uganda 2006       | X    |      |      |
| UG            | Uganda 2011       | X    | X    |      |
| UG            | Uganda 2016       | X    | X    |      |
| ZM            | Zambia 2007       | X    |      |      |
| ZM            | Zambia 2013       | X    | X    |      |
| ZW            | Zimbabwe 1994     | X    | X    | X    |
| ZW            | Zimbabwe 1999     | X    | X    | X    |

|                                           |                         |   |   |   |
|-------------------------------------------|-------------------------|---|---|---|
| ZW                                        | Zimbabwe 2005           | X | X | X |
| ZW                                        | Zimbabwe 2010           | X | X |   |
| ZW                                        | Zimbabwe 2015           | X | X |   |
| <b>Central and West Asia &amp; Europe</b> |                         |   |   |   |
| AL                                        | Albania 2008            | X |   |   |
| AL                                        | Albania 2017            | X | X |   |
| AM                                        | Armenia 2000            | X | X | X |
| AM                                        | Armenia 2005            | X | X | X |
| AM                                        | Armenia 2010            | X | X |   |
| AM                                        | Armenia 2015            | X | X |   |
| AZ                                        | Azerbaijan 2006         | X | X |   |
| KK                                        | Kazakhstan 1999         | X | X | X |
| KY                                        | Kyrgyz Republic 2012    | X | X |   |
| MB                                        | Moldova 2005            | X | X | X |
| TJ                                        | Tajikistan 2012         | X | X |   |
| TJ                                        | Tajikistan 2017         | X | X |   |
| TR                                        | Turkey 1998             | X | X | X |
| TR                                        | Turkey 2003             | X | X | X |
| UA                                        | Ukraine 2007            | X | X |   |
| <b>Latin America</b>                      |                         |   |   |   |
| BO                                        | Bolivia 1994            | X | X | X |
| BO                                        | Bolivia 1998            | X |   |   |
| BR                                        | Brazil 1996             | X | X | X |
| CO                                        | Colombia 1990           | X | X | X |
| CO                                        | Colombia 1995           | X | X | X |
| CO                                        | Colombia 2000           | X | X | X |
| CO                                        | Colombia 2005           | X | X | X |
| CO                                        | Colombia 2010           | X | X |   |
| CO                                        | Colombia 2015           | X | X |   |
| DR                                        | Dominican Republic 1991 | X | X | X |
| DR                                        | Dominican Republic 1996 | X | X | X |
| DR                                        | Dominican Republic 1999 | X | X | X |
| DR                                        | Dominican Republic 2002 | X | X | X |
| GU                                        | Guatemala 1995          | X | X | X |
| GU                                        | Guatemala 1998          | X | X | X |
| GU                                        | Guatemala 2014          | X | X |   |
| GY                                        | Guyana 2009             | X |   |   |
| HN                                        | Honduras 2005           | X |   |   |
| HN                                        | Honduras 2011           | X | X |   |
| NC                                        | Nicaragua 1998          | X | X | X |
| PE                                        | Peru 1991               | X | X | X |
| PE                                        | Peru 1996               | X | X | X |
| PE                                        | Peru 2000               | X | X | X |
| PE                                        | Peru 2004               | X | X | X |
| PE                                        | Peru 2007               | X | X | X |
| PE                                        | Peru 2009               | X | X | X |
| PE                                        | Peru 2010               | X | X | X |
| PE                                        | Peru 2011               | X | X | X |
| PY                                        | Paraguay 1990           | X | X | X |

**South and Southeast Asia**

|    |                  |   |   |   |
|----|------------------|---|---|---|
| IA | India 2005       | X | X | X |
| ID | Indonesia 2012   | X | X | X |
| KH | Cambodia 2010    | X | X |   |
| KH | Cambodia 2014    | X | X |   |
| NP | Nepal 2011       | X | X |   |
| NP | Nepal 2016       | X | X |   |
| PH | Philippines 1993 | X | X | X |
| PH | Philippines 1998 | X | X | X |
| PH | Philippines 2003 | X | X | X |
| TL | Timor Leste 2009 | X |   |   |
| TL | Timor Leste 2016 | X | X |   |
