# Supplementary material for: Reported patterns of pregnancy termination from Demographic and Health Surveys
Source: PubMed Central journal article supplement (PMC6699730; doi:10.1371/journal.pone.0221178), 2019-08-19
Supplement: pone.0221178.s004.pdf [file pone.0221178.s004.pdf]

| Code          | Survey            | Women  | Percentage of women |       |       |       |       |       |       | Pregnancies | Pregnancies ending in |             |
|---------------|-------------------|--------|---------------------|-------|-------|-------|-------|-------|-------|-------------|-----------------------|-------------|
|               |                   |        | In-union            | 15-19 | 20-24 | 25-29 | 30-34 | 35-39 | 40-49 |             | Birth                 | Termination |
| <b>Africa</b> |                   |        |                     |       |       |       |       |       |       |             |                       |             |
| AO            | Angola 2015       | 25,567 | 65.2                | 25.2  | 21.8  | 17.7  | 12.3  | 11.6  | 11.3  | 8,880       | 8,288                 | 592         |
| BF            | Burkina Faso 2010 | 31,132 | 82.9                | 21.0  | 20.1  | 18.6  | 14.5  | 12.0  | 13.8  | 10,029      | 9,530                 | 499         |
| BJ            | Benin 2011        | 29,692 | 77.6                | 18.9  | 20.4  | 19.8  | 16.3  | 12.6  | 12.1  | 8,253       | 7,937                 | 316         |
| BU            | Burundi 2010      | 16,403 | 65.4                | 27.4  | 20.9  | 16.5  | 11.6  | 10.7  | 12.8  | 5,428       | 5,032                 | 396         |
| BU            | Burundi 2016      | 30,485 | 65.3                | 23.5  | 20.7  | 16.3  | 14.7  | 11.3  | 13.4  | 9,060       | 8,321                 | 739         |
| ET            | Ethiopia 2005     | 23,964 | 68.2                | 26.7  | 21.4  | 17.6  | 12.4  | 10.8  | 11.1  | 7,078       | 6,770                 | 308         |
| ET            | Ethiopia 2011     | 29,672 | 75.1                | 24.5  | 21.3  | 18.5  | 13.6  | 11.1  | 11.0  | 7,506       | 7,036                 | 470         |
| ET            | Ethiopia 2016     | 27,528 | 73.6                | 24.4  | 19.1  | 19.7  | 14.3  | 12.2  | 10.3  | 7,006       | 6,636                 | 370         |
| GH            | Ghana 2008        | 8,859  | 69.6                | 22.3  | 19.4  | 16.7  | 14.6  | 12.9  | 14.2  | 2,097       | 1,799                 | 298         |
| GH            | Ghana 2014        | 17,169 | 69.2                | 18.6  | 18.7  | 17.9  | 14.8  | 13.8  | 16.1  | 4,390       | 3,593                 | 797         |
| KE            | Kenya 1998        | 13,636 | 64.4                | 25.3  | 20.6  | 17.3  | 14.1  | 12.1  | 10.5  | 3,748       | 3,540                 | 208         |
| KE            | Kenya 2003        | 14,857 | 61.2                | 24.8  | 21.0  | 17.7  | 13.4  | 10.9  | 12.2  | 4,034       | 3,809                 | 225         |
| KE            | Kenya 2008        | 15,151 | 70.1                | 23.0  | 21.0  | 17.9  | 13.8  | 11.1  | 13.2  | 3,895       | 3,664                 | 231         |
| KM            | Comoros 2012      | 9,059  | 69.3                | 26.4  | 19.1  | 18.2  | 13.5  | 11.8  | 11.0  | 2,205       | 2,038                 | 167         |
| LB            | Liberia 2013      | 16,786 | 76.3                | 20.8  | 18.4  | 17.8  | 14.2  | 13.4  | 15.4  | 4,599       | 4,047                 | 552         |
| LS            | Lesotho 2009      | 13,521 | 66.6                | 25.0  | 21.0  | 15.9  | 12.7  | 10.3  | 15.1  | 2,530       | 2,395                 | 135         |
| LS            | Lesotho 2014      | 11,764 | 65.3                | 24.8  | 20.5  | 16.9  | 13.8  | 10.9  | 13.1  | 2,253       | 2,068                 | 185         |
| MA            | Morocco 1992      | 14,145 | 67.7                | 15.6  | 22.9  | 17.0  | 16.7  | 13.2  | 14.5  | 3,445       | 3,152                 | 293         |
| MA            | Morocco 2003      | 30,068 | 60.2                | 21.9  | 18.9  | 16.4  | 12.5  | 12.2  | 18.1  | 4,123       | 3,636                 | 487         |
| MD            | Madagascar 2008   | 31,458 | 80.9                | 23.7  | 17.4  | 17.4  | 14.2  | 12.7  | 14.6  | 8,297       | 7,690                 | 607         |
| ML            | Mali 2012         | 18,960 | 85.9                | 21.6  | 19.7  | 21.4  | 14.8  | 11.4  | 11.1  | 6,392       | 6,133                 | 259         |
| MW            | Malawi 2004       | 20,692 | 73.1                | 25.9  | 24.4  | 15.7  | 13.1  | 10.1  | 10.7  | 7,235       | 6,877                 | 358         |
| MW            | Malawi 2010       | 41,117 | 82.5                | 21.7  | 21.6  | 19.2  | 14.6  | 11.0  | 11.9  | 13,049      | 12,329                | 720         |
| MW            | Malawi 2015       | 43,386 | 77.7                | 23.8  | 20.9  | 18.1  | 15.8  | 11.7  | 9.6   | 11,077      | 10,450                | 627         |

| Code | Survey            | Women  | Percentage of women |       |       |       |       |       |       | Pregnancies ending in |        |             |
|------|-------------------|--------|---------------------|-------|-------|-------|-------|-------|-------|-----------------------|--------|-------------|
|      |                   |        | In-union            | 15-19 | 20-24 | 25-29 | 30-34 | 35-39 | 40-49 | Pregnancies           | Birth  | Termination |
| MZ   | Mozambique 2011   | 24,487 | 77.8                | 22.4  | 20.0  | 18.0  | 13.9  | 12.1  | 13.6  | 7,888                 | 7,392  | 496         |
| NG   | Nigeria 2008      | 61,182 | 75.6                | 22.0  | 20.7  | 18.8  | 13.2  | 11.7  | 13.6  | 18,702                | 17,370 | 1,332       |
| NG   | Nigeria 2013      | 70,955 | 75.2                | 21.8  | 19.2  | 18.6  | 13.7  | 12.0  | 14.8  | 21,249                | 19,642 | 1,607       |
| NI   | Niger 2012        | 19,981 | 88.9                | 21.2  | 20.1  | 21.8  | 14.3  | 11.1  | 11.5  | 8,955                 | 8,325  | 630         |
| NM   | Namibia 2006      | 17,254 | 43.3                | 23.9  | 20.1  | 17.3  | 14.0  | 11.9  | 12.7  | 3,385                 | 3,205  | 180         |
| NM   | Namibia 2013      | 16,361 | 42.1                | 22.5  | 19.9  | 17.1  | 14.7  | 12.0  | 13.8  | 3,312                 | 3,083  | 229         |
| RW   | Rwanda 2010       | 24,554 | 61.9                | 22.4  | 21.7  | 18.2  | 12.9  | 10.4  | 14.4  | 5,835                 | 5,418  | 417         |
| RW   | Rwanda 2014       | 24,480 | 61.9                | 21.0  | 19.4  | 18.5  | 16.0  | 11.6  | 13.5  | 5,556                 | 5,118  | 438         |
| SL   | Sierra Leone 2008 | 13,396 | 79.7                | 20.4  | 20.8  | 20.3  | 15.5  | 12.0  | 11.1  | 3,946                 | 3,697  | 249         |
| SL   | Sierra Leone 2013 | 28,995 | 74.8                | 23.3  | 18.3  | 18.0  | 15.0  | 12.9  | 12.5  | 7,952                 | 7,414  | 538         |
| SN   | Senegal 2012      | 15,240 | 71.0                | 26.6  | 21.7  | 17.2  | 12.6  | 10.1  | 11.7  | 4,419                 | 4,008  | 411         |
| SN   | Senegal 2014      | 14,926 | 72.6                | 25.1  | 20.9  | 18.6  | 13.2  | 10.5  | 11.7  | 4,188                 | 3,839  | 349         |
| SN   | Senegal 2015      | 15,692 | 71.9                | 25.8  | 19.8  | 18.9  | 12.7  | 11.4  | 11.5  | 4,294                 | 3,903  | 391         |
| SN   | Senegal 2016      | 15,709 | 72.9                | 25.4  | 20.6  | 17.7  | 14.0  | 10.6  | 11.8  | 4,115                 | 3,741  | 374         |
| SN   | Senegal 2017      | 29,760 | 71.2                | 25.0  | 18.7  | 18.6  | 14.6  | 11.6  | 11.5  | 7,728                 | 6,930  | 798         |
| TZ   | Tanzania 2004     | 18,442 | 67.8                | 23.1  | 20.6  | 18.3  | 14.5  | 10.8  | 12.6  | 6,052                 | 5,520  | 532         |
| TZ   | Tanzania 2010     | 18,097 | 75.0                | 22.1  | 19.6  | 17.1  | 14.3  | 12.6  | 14.3  | 5,535                 | 5,088  | 447         |
| TZ   | Tanzania 2015     | 23,887 | 73.3                | 23.5  | 19.1  | 16.6  | 13.9  | 12.7  | 14.3  | 6,999                 | 6,314  | 685         |
| UG   | Uganda 2006       | 15,203 | 78.2                | 23.2  | 20.3  | 17.8  | 14.6  | 11.3  | 12.8  | 5,778                 | 5,217  | 561         |
| UG   | Uganda 2011       | 15,543 | 75.0                | 23.7  | 21.1  | 18.4  | 13.5  | 11.6  | 11.6  | 5,572                 | 5,015  | 557         |
| UG   | Uganda 2016       | 33,314 | 73.9                | 24.4  | 20.7  | 17.8  | 13.4  | 11.4  | 12.3  | 10,528                | 9,375  | 1,153       |
| ZM   | Zambia 2007       | 12,682 | 73.8                | 23.2  | 22.6  | 19.1  | 14.0  | 10.3  | 10.7  | 4,384                 | 4,112  | 272         |
| ZM   | Zambia 2013       | 29,627 | 72.3                | 23.9  | 18.9  | 18.2  | 14.8  | 12.2  | 12.0  | 8,592                 | 8,108  | 484         |
| ZW   | Zimbabwe 1994     | 10,776 | 64.9                | 25.5  | 20.7  | 16.7  | 13.7  | 11.5  | 12.0  | 2,645                 | 2,427  | 218         |
| ZW   | Zimbabwe 1999     | 9,872  | 62.5                | 28.4  | 23.2  | 16.9  | 9.0   | 10.8  | 11.6  | 2,452                 | 2,252  | 200         |
| ZW   | Zimbabwe 2005     | 15,481 | 61.1                | 27.2  | 22.0  | 16.9  | 12.5  | 9.6   | 11.8  | 3,557                 | 3,298  | 259         |

| Code                                      | Survey               | Women  | Percentage of women |       |       |       |       |       |       | Pregnancies | Pregnancies ending in |             |
|-------------------------------------------|----------------------|--------|---------------------|-------|-------|-------|-------|-------|-------|-------------|-----------------------|-------------|
|                                           |                      |        | In-union            | 15-19 | 20-24 | 25-29 | 30-34 | 35-39 | 40-49 |             | Birth                 | Termination |
| ZW                                        | Zimbabwe 2010        | 16,255 | 72.0                | 23.9  | 21.8  | 18.5  | 14.8  | 10.8  | 10.2  | 3,981       | 3,702                 | 279         |
| ZW                                        | Zimbabwe 2015        | 17,660 | 73.2                | 21.3  | 19.2  | 18.5  | 16.5  | 12.7  | 11.8  | 4,207       | 3,851                 | 356         |
| <b>Central and West Asia &amp; Europe</b> |                      |        |                     |       |       |       |       |       |       |             |                       |             |
| AL                                        | Albania 2008         | 11,904 | 69.4                | 20.4  | 14.7  | 11.9  | 15.5  | 19.6  | 18.0  | 1,049       | 882                   | 167         |
| AL                                        | Albania 2017         | 17,926 | 80.7                | 9.6   | 16.4  | 14.1  | 15.1  | 16.1  | 28.7  | 1,767       | 1,604                 | 163         |
| AM                                        | Armenia 2000         | 11,234 | 70.3                | 19.5  | 15.8  | 12.4  | 14.6  | 16.7  | 21.0  | 2,508       | 932                   | 1,576       |
| AM                                        | Armenia 2005         | 9,783  | 75.2                | 12.6  | 15.2  | 14.8  | 14.3  | 17.0  | 26.2  | 2,035       | 978                   | 1,057       |
| AM                                        | Armenia 2010         | 9,427  | 74.8                | 11.2  | 21.7  | 16.0  | 14.7  | 13.8  | 22.5  | 1,508       | 956                   | 552         |
| AM                                        | Armenia 2015         | 10,568 | 76.1                | 8.0   | 19.2  | 19.8  | 17.1  | 15.3  | 20.7  | 1,549       | 1,048                 | 501         |
| AZ                                        | Azerbaijan 2006      | 14,366 | 67.3                | 20.7  | 17.5  | 14.3  | 14.1  | 15.9  | 17.5  | 3,121       | 1,491                 | 1,630       |
| KK                                        | Kazakhstan 1999      | 8,507  | 65.4                | 17.8  | 14.9  | 16.9  | 16.4  | 16.2  | 17.8  | 1,613       | 856                   | 757         |
| KY                                        | Kyrgyz Republic 2012 | 14,831 | 73.6                | 20.1  | 19.7  | 15.9  | 13.1  | 12.5  | 18.8  | 3,436       | 2,665                 | 771         |
| MB                                        | Moldova 2005         | 13,033 | 67.5                | 20.9  | 16.0  | 14.4  | 13.5  | 12.9  | 22.2  | 1,854       | 1,036                 | 818         |
| TJ                                        | Tajikistan 2012      | 17,680 | 69.9                | 22.8  | 20.3  | 15.7  | 12.6  | 11.8  | 16.7  | 4,111       | 3,455                 | 656         |
| TJ                                        | Tajikistan 2017      | 19,554 | 74.5                | 20.4  | 19.5  | 18.5  | 13.9  | 12.1  | 15.6  | 4,850       | 4,079                 | 771         |
| TR                                        | Turkey 1998          | 13,319 | 81.3                | 15.1  | 18.3  | 17.5  | 17.8  | 14.7  | 16.5  | 2,860       | 2,158                 | 702         |
| TR                                        | Turkey 2003          | 15,300 | 94.8                | 5.6   | 15.8  | 19.8  | 17.8  | 17.8  | 23.2  | 3,200       | 2,464                 | 736         |
| UA                                        | Ukraine 2007         | 12,342 | 76.9                | 14.3  | 15.7  | 16.2  | 16.0  | 15.9  | 21.8  | 1,061       | 701                   | 360         |
| <b>Latin America</b>                      |                      |        |                     |       |       |       |       |       |       |             |                       |             |
| BO                                        | Bolivia 1994         | 15,303 | 64.5                | 21.9  | 18.9  | 17.4  | 15.5  | 12.5  | 13.7  | 4,086       | 3,718                 | 368         |
| BO                                        | Bolivia 2008         | 31,082 | 67.9                | 21.2  | 17.6  | 16.9  | 14.2  | 13.0  | 17.2  | 6,217       | 5,412                 | 805         |
| BR                                        | Brazil 1996          | 22,715 | 63.1                | 20.2  | 16.9  | 17.3  | 15.8  | 13.7  | 16.2  | 3,386       | 2,927                 | 459         |
| CO                                        | Colombia 1990        | 15,418 | 64.9                | 22.3  | 21.5  | 19.0  | 14.5  | 11.1  | 11.6  | 2,684       | 2,348                 | 336         |
| CO                                        | Colombia 1995        | 20,150 | 57.8                | 19.8  | 19.3  | 17.7  | 14.2  | 13.4  | 15.6  | 3,543       | 3,143                 | 400         |
| CO                                        | Colombia 2000        | 21,255 | 54.6                | 21.0  | 17.3  | 16.1  | 15.3  | 14.0  | 16.3  | 3,350       | 2,823                 | 527         |

| Code                            | Survey                  | Women   | Percentage of women |       |       |       |       |       |       | Pregnancies | Pregnancies ending in |             |
|---------------------------------|-------------------------|---------|---------------------|-------|-------|-------|-------|-------|-------|-------------|-----------------------|-------------|
|                                 |                         |         | In-union            | 15-19 | 20-24 | 25-29 | 30-34 | 35-39 | 40-49 |             | Birth                 | Termination |
| CO                              | Colombia 2005           | 70,147  | 55.4                | 19.0  | 17.6  | 15.3  | 14.8  | 14.3  | 19.0  | 10,185      | 8,374                 | 1,811       |
| CO                              | Colombia 2010           | 89,239  | 70.5                | 19.5  | 16.8  | 16.1  | 14.5  | 14.3  | 18.8  | 11,639      | 9,568                 | 2,071       |
| CO                              | Colombia 2015           | 66,362  | 71.3                | 18.7  | 16.9  | 15.6  | 14.9  | 13.4  | 20.5  | 7,807       | 6,603                 | 1,204       |
| DR                              | Dominican Republic 1991 | 12,546  | 63.4                | 25.5  | 22.5  | 17.7  | 14.3  | 11.0  | 9.0   | 2,877       | 2,463                 | 414         |
| DR                              | Dominican Republic 1996 | 14,905  | 65.3                | 22.9  | 20.1  | 17.2  | 14.7  | 12.9  | 12.3  | 3,255       | 2,709                 | 546         |
| DR                              | Dominican Republic 1999 | 2,028   | 62.6                | 24.1  | 21.3  | 19.4  | 16.9  | 7.7   | 10.6  | 435         | 340                   | 95          |
| DR                              | Dominican Republic 2002 | 41,477  | 67.7                | 21.7  | 18.4  | 16.6  | 14.9  | 13.9  | 14.4  | 8,065       | 6,761                 | 1,304       |
| GU                              | Guatemala 1995          | 21,716  | 70.9                | 24.3  | 19.2  | 14.8  | 13.6  | 12.8  | 15.4  | 6,179       | 5,811                 | 368         |
| GU                              | Guatemala 1998          | 10,598  | 71.4                | 24.7  | 19.8  | 15.8  | 13.3  | 12.6  | 13.9  | 2,988       | 2,813                 | 175         |
| GU                              | Guatemala 2014          | 47,045  | 68.1                | 23.1  | 19.1  | 16.0  | 14.2  | 12.3  | 15.4  | 8,300       | 7,649                 | 651         |
| GY                              | Guyana 2009             | 8,916   | 70.9                | 20.3  | 15.6  | 15.2  | 14.7  | 14.8  | 19.3  | 1,567       | 1,225                 | 342         |
| HN                              | Honduras 2005           | 36,022  | 73.7                | 23.3  | 19.6  | 16.4  | 13.9  | 11.7  | 15.0  | 6,767       | 6,154                 | 613         |
| HN                              | Honduras 2011           | 41,241  | 72.6                | 23.2  | 19.0  | 16.3  | 14.3  | 12.1  | 15.0  | 7,120       | 6,420                 | 700         |
| NC                              | Nicaragua 1998          | 23,629  | 67.4                | 25.1  | 19.2  | 17.3  | 14.6  | 12.0  | 11.7  | 5,145       | 4,734                 | 411         |
| PE                              | Peru 1991               | 28,575  | 59.7                | 23.1  | 19.8  | 16.9  | 14.7  | 12.4  | 13.1  | 5,696       | 5,114                 | 582         |
| PE                              | Peru 1996               | 52,860  | 63.8                | 21.5  | 18.9  | 17.3  | 15.1  | 12.7  | 14.5  | 10,459      | 9,408                 | 1,051       |
| PE                              | Peru 2000               | 50,579  | 62.2                | 20.7  | 18.1  | 16.4  | 15.5  | 13.5  | 15.8  | 8,027       | 7,201                 | 826         |
| PE                              | Peru 2004               | 34,361  | 61.3                | 19.6  | 17.3  | 16.3  | 15.6  | 14.6  | 16.6  | 4,531       | 4,019                 | 512         |
| PE                              | Peru 2007               | 40,992  | 62.6                | 18.7  | 16.7  | 15.9  | 15.5  | 13.2  | 19.9  | 5,949       | 5,116                 | 833         |
| PE                              | Peru 2009               | 44,210  | 63.1                | 18.7  | 16.5  | 15.9  | 15.4  | 14.7  | 18.9  | 6,514       | 5,599                 | 915         |
| PE                              | Peru 2010               | 41,908  | 62.6                | 18.5  | 16.3  | 15.9  | 15.7  | 14.7  | 19.0  | 6,115       | 5,150                 | 965         |
| PE                              | Peru 2011               | 40,991  | 63.2                | 18.1  | 16.1  | 16.0  | 15.8  | 14.8  | 19.2  | 6,109       | 5,184                 | 925         |
| PY                              | Paraguay 1990           | 10,530  | 64.6                | 22.4  | 19.1  | 17.5  | 14.2  | 12.1  | 14.6  | 2,789       | 2,485                 | 304         |
| <b>South and Southeast Asia</b> |                         |         |                     |       |       |       |       |       |       |             |                       |             |
| IA                              | India 2005              | 227,719 | 72.6                | 21.3  | 19.4  | 17.3  | 15.1  | 13.0  | 14.0  | 38,223      | 33,576                | 4,647       |
| ID                              | Indonesia 2012          | 84,923  | 71.9                | 16.1  | 15.9  | 17.1  | 16.0  | 15.4  | 19.5  | 11,858      | 10,600                | 1,258       |

| Code | Survey           | Women  | Percentage of women |       |       |       |       |       |       | Pregnancies | Pregnancies ending in |             |
|------|------------------|--------|---------------------|-------|-------|-------|-------|-------|-------|-------------|-----------------------|-------------|
|      |                  |        | In-union            | 15-19 | 20-24 | 25-29 | 30-34 | 35-39 | 40-49 |             | Birth                 | Termination |
| KH   | Cambodia 2010    | 33,889 | 69.9                | 21.2  | 18.7  | 18.2  | 10.1  | 12.5  | 19.4  | 6,514       | 5,108                 | 1,406       |
| KH   | Cambodia 2014    | 32,230 | 71.9                | 18.7  | 18.4  | 18.1  | 16.1  | 10.3  | 18.4  | 5,985       | 4,555                 | 1,430       |
| NP   | Nepal 2011       | 22,776 | 78.0                | 23.1  | 19.4  | 16.8  | 14.4  | 12.6  | 13.7  | 3,848       | 3,275                 | 573         |
| NP   | Nepal 2016       | 23,046 | 81.9                | 22.1  | 17.1  | 16.6  | 14.6  | 13.0  | 16.6  | 3,749       | 3,008                 | 741         |
| PH   | Philippines 1993 | 26,738 | 63.7                | 21.4  | 18.9  | 17.6  | 14.7  | 13.4  | 14.0  | 6,144       | 5,549                 | 595         |
| PH   | Philippines 1998 | 24,745 | 64.3                | 21.3  | 17.6  | 17.2  | 15.2  | 13.0  | 15.6  | 5,229       | 4,667                 | 562         |
| PH   | Philippines 2003 | 24,282 | 66.2                | 19.6  | 17.9  | 16.5  | 15.9  | 13.5  | 16.6  | 4,787       | 4,288                 | 499         |
| TL   | Timor Leste 2009 | 22,591 | 67.4                | 25.5  | 18.7  | 12.4  | 13.9  | 14.0  | 15.5  | 6,225       | 6,044                 | 181         |
| TL   | Timor Leste 2016 | 21,001 | 63.0                | 25.3  | 17.9  | 16.6  | 12.9  | 10.4  | 16.9  | 4,680       | 4,521                 | 159         |
