# Supplementary material for: Reported patterns of pregnancy termination from Demographic and Health Surveys
Source: PubMed Central journal article supplement (PMC6699730; doi:10.1371/journal.pone.0221178), 2019-08-19
Supplement: pone.0221178.s005.pdf [file pone.0221178.s005.pdf]

| Code          | Survey            | Cluster | Contraceptive use |      |       |      |           |      | Union status |      |              |      | Age-group |      |       |      |       |      |
|---------------|-------------------|---------|-------------------|------|-------|------|-----------|------|--------------|------|--------------|------|-----------|------|-------|------|-------|------|
|               |                   |         | Total             |      | Using |      | Not using |      | In-union     |      | Not-in-union |      | 15-24     |      | 25-34 |      | 35-49 |      |
|               |                   |         | P                 | T    | P     | T    | P         | T    | P            | T    | P            | T    | P         | T    | P     | T    | P     | T    |
| <b>Africa</b> |                   |         |                   |      |       |      |           |      |              |      |              |      |           |      |       |      |       |      |
| AO            | Angola 2015       | 1       | 8,880             | 6.7  | 38    | 23.7 | 8,842     | 6.6  | 6,507        | 6.4  | 2,374        | 7.3  | 4,240     | 6.6  | 3,324 | 5.6  | 1,316 | 9.6  |
| BF            | Burkina Faso 2010 | 1       | 10,029            | 5.0  | 65    | 13.8 | 9,965     | 4.9  | 9,687        | 4.8  | 342          | 9.6  | 4,171     | 5.4  | 4,248 | 4.2  | 1,610 | 6.1  |
| BJ            | Benin 2011        | 1       | 8,253             | 3.8  | 39    | 10.3 | 8,215     | 3.8  | 7,434        | 3.6  | 819          | 6.1  | 3,180     | 3.9  | 4,001 | 3.5  | 1,072 | 5.0  |
| BU            | Burundi 2010      | 1       | 5,428             | 7.3  | 95    | 7.4  | 5,333     | 7.3  | 5,157        | 7.3  | 271          | 7.4  | 2,104     | 7.3  | 2,272 | 5.2  | 1,052 | 11.8 |
| BU            | Burundi 2016      | 1       | 9,060             | 8.2  | 151   | 6.0  | 8,909     | 8.2  | 8,463        | 8.3  | 598          | 5.5  | 3,051     | 7.8  | 4,310 | 6.5  | 1,699 | 12.9 |
| ET            | Ethiopia 2005     | 1       | 7,078             | 4.4  | 62    | 24.2 | 7,016     | 4.2  | 6,935        | 4.3  | 143          | 7.7  | 2,941     | 4.1  | 3,013 | 3.7  | 1,124 | 6.8  |
| ET            | Ethiopia 2011     | 1       | 7,506             | 6.3  | 373   | 7.2  | 7,133     | 6.2  | 7,315        | 6.2  | 191          | 7.9  | 3,074     | 6.5  | 3,288 | 4.3  | 1,144 | 11.2 |
| ET            | Ethiopia 2016     | 1       | 7,006             | 5.3  | 70    | 14.3 | 6,936     | 5.2  | 6,851        | 5.2  | 155          | 10.3 | 2,692     | 4.2  | 3,219 | 4.9  | 1,095 | 8.9  |
| GH            | Ghana 2008        | 2       | 2,097             | 14.2 | 162   | 17.3 | 1,935     | 14.0 | 1,811        | 11.8 | 286          | 29.4 | 811       | 15.5 | 931   | 12.5 | 355   | 15.8 |
| GH            | Ghana 2014        | 2       | 4,390             | 18.2 | 201   | 29.9 | 4,190     | 17.6 | 3,671        | 14.7 | 719          | 36.2 | 1,474     | 20.6 | 2,072 | 15.8 | 844   | 19.7 |
| KE            | Kenya 1998        | 1       | 3,748             | 5.5  | 326   | 4.9  | 3,422     | 5.6  | 3,069        | 5.2  | 679          | 7.1  | 1,837     | 5.2  | 1,487 | 5.4  | 424   | 7.5  |
| KE            | Kenya 2003        | 1       | 4,034             | 5.6  | 324   | 6.8  | 3,710     | 5.5  | 3,419        | 5.7  | 616          | 5.0  | 1,950     | 5.8  | 1,602 | 4.3  | 482   | 8.7  |
| KE            | Kenya 2008        | 1       | 3,895             | 5.9  | 495   | 5.7  | 3,400     | 6.0  | 3,249        | 6.4  | 647          | 3.7  | 1,818     | 4.0  | 1,584 | 5.7  | 493   | 13.6 |
| KM            | Comoros 2012      | 1       | 2,205             | 7.6  | 26    | 3.8  | 2,180     | 7.6  | 2,103        | 7.5  | 102          | 8.8  | 796       | 5.2  | 1,037 | 7.3  | 372   | 13.4 |
| LB            | Liberia 2013      | 2       | 4,599             | 12.0 | 91    | 37.4 | 4,507     | 11.5 | 3,498        | 11.9 | 1,101        | 12.2 | 2,154     | 10.1 | 1,765 | 12.6 | 680   | 16.5 |
| LS            | Lesotho 2009      | 1       | 2,530             | 5.3  | 228   | 7.0  | 2,301     | 5.2  | 1,962        | 5.5  | 568          | 4.9  | 1,359     | 5.1  | 906   | 4.9  | 265   | 8.3  |
| LS            | Lesotho 2014      | 1       | 2,253             | 8.2  | 260   | 6.2  | 1,992     | 8.5  | 1,696        | 8.5  | 556          | 7.6  | 1,181     | 6.4  | 820   | 9.6  | 252   | 11.9 |
| MA            | Morocco 1992      | 1       | 3,445             | 8.5  | 435   | 11.3 | 3,010     | 8.1  | 3,430        | 8.5  | 15           | 6.7  | 1,034     | 7.5  | 1,660 | 8.3  | 751   | 10.4 |
| MA            | Morocco 2003      | 1       | 4,123             | 11.8 | 868   | 13.4 | 3,255     | 11.4 | 4,091        | 11.8 | 33           | 15.2 | 1,374     | 9.3  | 1,935 | 10.2 | 814   | 19.8 |
| MD            | Madagascar 2008   | 1       | 8,297             | 7.3  | 517   | 13.2 | 7,780     | 6.9  | 7,533        | 6.8  | 763          | 12.3 | 3,909     | 6.9  | 3,109 | 7.1  | 1,279 | 8.9  |
| ML            | Mali 2012         | 1       | 6,392             | 4.1  | 9     | 11.1 | 6,383     | 4.0  | 6,084        | 4.0  | 308          | 5.2  | 2,680     | 4.0  | 2,838 | 3.6  | 874   | 5.5  |
| MW            | Malawi 2004       | 1       | 7,235             | 4.9  | 240   | 3.8  | 6,995     | 5.0  | 6,651        | 4.9  | 584          | 5.1  | 3,932     | 4.8  | 2,474 | 4.4  | 829   | 7.0  |
| MW            | Malawi 2010       | 1       | 13,049            | 5.5  | 945   | 3.9  | 12,103    | 5.6  | 12,080       | 5.3  | 969          | 8.5  | 6,257     | 5.1  | 5,072 | 5.3  | 1,720 | 7.7  |
| MW            | Malawi 2015       | 1       | 11,077            | 5.7  | 225   | 6.2  | 10,853    | 5.6  | 9,652        | 5.4  | 1,426        | 7.4  | 5,612     | 5.8  | 4,167 | 5.1  | 1,298 | 6.9  |
| MZ            | Mozambique 2011   | 1       | 7,888             | 6.3  | 58    | 19.0 | 7,830     | 6.2  | 6,872        | 5.6  | 1,016        | 11.0 | 3,648     | 6.9  | 3,045 | 5.3  | 1,195 | 6.9  |
| NG            | Nigeria 2008      | 1       | 18,702            | 7.1  | 909   | 12.9 | 17,794    | 6.8  | 17,311       | 6.2  | 1,392        | 18.0 | 7,470     | 7.2  | 8,253 | 5.8  | 2,979 | 10.5 |

| Code | Survey            | Cluster | Contraceptive use |      |       |      |           |      | Union status |      |              |      | Age-group |     |       |     |       |      |
|------|-------------------|---------|-------------------|------|-------|------|-----------|------|--------------|------|--------------|------|-----------|-----|-------|-----|-------|------|
|      |                   |         | Total             |      | Using |      | Not using |      | In-union     |      | Not-in-union |      | 15-24     |     | 25-34 |     | 35-49 |      |
|      |                   |         | P                 | T    | P     | T    | P         | T    | P            | T    | P            | T    | P         | T   | P     | T   | P     | T    |
| NG   | Nigeria 2013      | 1       | 21,249            | 7.6  | 501   | 17.6 | 20,748    | 7.3  | 20,002       | 7.0  | 1,247        | 16.1 | 8,451     | 6.9 | 9,410 | 7.0 | 3,388 | 10.9 |
| NI   | Niger 2012        | 1       | 8,955             | 7.0  | 32    | 6.2  | 8,923     | 7.0  | 8,785        | 7.1  | 171          | 6.4  | 3,758     | 5.9 | 3,906 | 6.6 | 1,291 | 11.7 |
| NM   | Namibia 2006      | 1       | 3,385             | 5.3  | 309   | 4.2  | 3,076     | 5.4  | 1,705        | 7.1  | 1,680        | 3.5  | 1,486     | 3.6 | 1,385 | 5.3 | 514   | 10.5 |
| NM   | Namibia 2013      | 1       | 3,312             | 6.9  | 327   | 4.6  | 2,985     | 7.2  | 1,455        | 8.1  | 1,857        | 6.0  | 1,414     | 4.5 | 1,388 | 8.1 | 510   | 10.4 |
| RW   | Rwanda 2010       | 1       | 5,835             | 7.1  | 248   | 9.7  | 5,587     | 7.0  | 5,199        | 7.3  | 635          | 6.0  | 2,036     | 6.9 | 2,729 | 5.5 | 1,070 | 12.0 |
| RW   | Rwanda 2014       | 1       | 5,556             | 7.9  | 370   | 11.6 | 5,186     | 7.6  | 4,747        | 8.2  | 809          | 5.9  | 1,803     | 6.9 | 2,794 | 7.0 | 959   | 12.3 |
| SL   | Sierra Leone 2008 | 1       | 3,946             | 6.3  | 94    | 9.6  | 3,853     | 6.2  | 3,502        | 6.1  | 444          | 8.1  | 1,685     | 6.1 | 1,687 | 6.1 | 574   | 7.7  |
| SL   | Sierra Leone 2013 | 1       | 7,952             | 6.8  | 104   | 21.2 | 7,848     | 6.6  | 6,790        | 6.5  | 1,163        | 8.5  | 3,373     | 6.4 | 3,332 | 6.2 | 1,247 | 9.1  |
| SN   | Senegal 2012      | 1       | 4,419             | 9.3  | 33    | 12.1 | 4,386     | 9.3  | 4,209        | 9.4  | 209          | 6.7  | 1,773     | 9.4 | 1,886 | 7.9 | 760   | 12.6 |
| SN   | Senegal 2014      | 1       | 4,188             | 8.3  | 28    | 10.7 | 4,159     | 8.3  | 3,915        | 8.4  | 273          | 7.0  | 1,570     | 7.4 | 1,913 | 8.4 | 705   | 10.2 |
| SN   | Senegal 2015      | 1       | 4,294             | 9.1  | 55    | 14.5 | 4,239     | 9.1  | 4,066        | 9.3  | 229          | 5.7  | 1,567     | 7.0 | 1,947 | 7.6 | 780   | 17.1 |
| SN   | Senegal 2016      | 1       | 4,115             | 9.1  | 91    | 9.9  | 4,024     | 9.1  | 3,930        | 8.9  | 185          | 12.4 | 1,523     | 7.6 | 1,898 | 8.1 | 694   | 15.0 |
| SN   | Senegal 2017      | 1       | 7,728             | 10.3 | 63    | 6.3  | 7,665     | 10.4 | 7,326        | 10.5 | 402          | 7.7  | 2,754     | 8.8 | 3,558 | 8.7 | 1,416 | 17.4 |
| TZ   | Tanzania 2004     | 1       | 6,052             | 8.8  | 255   | 13.7 | 5,796     | 8.6  | 5,288        | 8.3  | 764          | 12.3 | 2,765     | 7.5 | 2,492 | 8.1 | 795   | 15.5 |
| TZ   | Tanzania 2010     | 1       | 5,535             | 8.1  | 309   | 4.2  | 5,226     | 8.3  | 4,938        | 8.3  | 597          | 6.0  | 2,392     | 7.3 | 2,251 | 6.8 | 892   | 13.5 |
| TZ   | Tanzania 2015     | 1       | 6,999             | 9.8  | 368   | 12.2 | 6,631     | 9.7  | 6,053        | 9.7  | 946          | 10.5 | 3,121     | 8.5 | 2,719 | 9.3 | 1,159 | 14.5 |
| UG   | Uganda 2006       | 1       | 5,778             | 9.7  | 328   | 11.6 | 5,450     | 9.6  | 5,291        | 9.5  | 487          | 12.3 | 2,586     | 8.9 | 2,332 | 7.7 | 860   | 17.4 |
| UG   | Uganda 2011       | 1       | 5,572             | 10.0 | 253   | 9.9  | 5,319     | 10.0 | 5,040        | 9.6  | 532          | 13.5 | 2,587     | 9.4 | 2,187 | 8.1 | 798   | 17.0 |
| UG   | Uganda 2016       | 2       | 10,528            | 11.0 | 422   | 17.3 | 10,106    | 10.7 | 9,152        | 10.8 | 1,376        | 11.8 | 5,025     | 9.9 | 4,064 | 9.6 | 1,439 | 18.4 |
| ZM   | Zambia 2007       | 1       | 4,384             | 6.2  | 468   | 6.4  | 3,917     | 6.2  | 3,828        | 6.1  | 556          | 7.0  | 1,957     | 6.0 | 1,814 | 6.2 | 613   | 6.9  |
| ZM   | Zambia 2013       | 1       | 8,592             | 5.6  | 536   | 5.0  | 8,056     | 5.7  | 7,181        | 5.6  | 1,411        | 6.0  | 3,819     | 5.3 | 3,522 | 4.8 | 1,251 | 9.0  |
| ZW   | Zimbabwe 1994     | 1       | 2,645             | 8.2  | 279   | 9.7  | 2,366     | 8.1  | 2,231        | 8.2  | 414          | 8.2  | 1,295     | 8.2 | 992   | 6.5 | 358   | 13.4 |
| ZW   | Zimbabwe 1999     | 1       | 2,452             | 8.2  | 222   | 8.6  | 2,230     | 8.1  | 2,027        | 8.2  | 425          | 8.2  | 1,349     | 8.2 | 808   | 6.6 | 295   | 12.2 |
| ZW   | Zimbabwe 2005     | 1       | 3,557             | 7.3  | 358   | 6.4  | 3,199     | 7.4  | 3,028        | 7.4  | 529          | 6.6  | 1,940     | 6.9 | 1,274 | 6.0 | 343   | 14.3 |
| ZW   | Zimbabwe 2010     | 1       | 3,981             | 7.0  | 283   | 6.7  | 3,698     | 7.0  | 3,404        | 7.1  | 578          | 6.6  | 1,987     | 6.2 | 1,599 | 7.8 | 395   | 7.6  |
| ZW   | Zimbabwe 2015     | 1       | 4,207             | 8.5  | 346   | 7.2  | 3,860     | 8.6  | 3,634        | 8.4  | 572          | 9.1  | 1,879     | 9.0 | 1,805 | 6.2 | 523   | 14.3 |

Central and West Asia & Europe

| Code                 | Survey              | Cluster | Contraceptive use |      |       |      |           |      | Union status |      |              |       | Age-group |      |       |      |       |      |
|----------------------|---------------------|---------|-------------------|------|-------|------|-----------|------|--------------|------|--------------|-------|-----------|------|-------|------|-------|------|
|                      |                     |         | Total             |      | Using |      | Not using |      | In-union     |      | Not-in-union |       | 15-24     |      | 25-34 |      | 35-49 |      |
|                      |                     |         | P                 | T    | P     | T    | P         | T    | P            | T    | P            | T     | P         | T    | P     | T    | P     | T    |
| AL                   | Albania 2008        | 2       | 1,049             | 15.9 | 221   | 18.6 | 828       | 15.3 | 996          | 16.6 | 53           | 3.8   | 372       | 10.2 | 580   | 15.3 | 97    | 41.2 |
| AL                   | Albania 2017        | 1       | 1,767             | 9.2  | 82    | 22.0 | 1,686     | 8.6  | 1,665        | 9.6  | 103          | 2.9   | 591       | 7.3  | 994   | 7.8  | 182   | 23.1 |
| AM                   | Armenia 2000        | 4       | 2,508             | 62.8 | 1,080 | 85.2 | 1,428     | 45.9 | 2,495        | 62.8 | 13           | 61.5  | 988       | 40.1 | 1,096 | 74.0 | 424   | 87.0 |
| AM                   | Armenia 2005        | 4       | 2,035             | 51.9 | 586   | 83.3 | 1,449     | 39.3 | 1,991        | 51.9 | 43           | 53.5  | 830       | 31.1 | 960   | 62.7 | 245   | 80.4 |
| AM                   | Armenia 2010        | 3       | 1,508             | 36.6 | 276   | 67.4 | 1,232     | 29.7 | 1,487        | 36.9 | 20           | 15.0  | 690       | 22.8 | 677   | 46.1 | 141   | 58.9 |
| AM                   | Armenia 2015        | 3       | 1,549             | 32.3 | 220   | 75.5 | 1,328     | 25.3 | 1,522        | 32.4 | 27           | 29.6  | 571       | 21.9 | 838   | 36.8 | 140   | 48.6 |
| AZ                   | Azerbaijan 2006     | 4       | 3,121             | 52.2 | 664   | 82.4 | 2,457     | 44.1 | 3,069        | 52.6 | 52           | 32.7  | 1,234     | 31.4 | 1,382 | 60.6 | 505   | 80.4 |
| KK                   | Kazakhstan 1999     | 4       | 1,613             | 46.9 | 374   | 78.3 | 1,238     | 37.6 | 1,458        | 45.5 | 154          | 61.0  | 653       | 35.2 | 746   | 51.3 | 214   | 67.3 |
| KY                   | Kyrgyz Rep. 2012    | 3       | 3,436             | 22.4 | 213   | 50.2 | 3,222     | 20.6 | 3,317        | 22.4 | 119          | 23.5  | 1,458     | 17.6 | 1,543 | 24.4 | 435   | 31.7 |
| MB                   | Moldova 2005        | 4       | 1,854             | 44.1 | 536   | 67.9 | 1,318     | 34.4 | 1,713        | 43.3 | 141          | 53.2  | 869       | 35.4 | 790   | 46.7 | 195   | 72.3 |
| TJ                   | Tajikistan 2012     | 3       | 4,111             | 16.0 | 74    | 54.1 | 4,037     | 15.3 | 4,034        | 15.9 | 77           | 16.9  | 2,003     | 11.2 | 1,707 | 17.6 | 401   | 32.4 |
| TJ                   | Tajikistan 2017     | 2       | 4,850             | 15.9 | 41    | 39.0 | 4,809     | 15.7 | 4,771        | 15.9 | 80           | 13.8  | 2,462     | 10.5 | 2,027 | 18.7 | 361   | 36.8 |
| TR                   | Turkey 1998         | 3       | 2,860             | 24.5 | 615   | 45.7 | 2,244     | 18.8 | 2,849        | 24.5 | 10           | 30.0  | 1,316     | 17.6 | 1,233 | 25.9 | 311   | 48.9 |
| TR                   | Turkey 2003         | 3       | 3,200             | 23.0 | 851   | 37.6 | 2,350     | 17.7 | 3,199        | 22.9 | 2            | 100.0 | 1,393     | 15.7 | 1,398 | 23.8 | 409   | 45.0 |
| UA                   | Ukraine 2007        | 3       | 1,061             | 33.9 | 264   | 65.2 | 797       | 23.6 | 974          | 34.5 | 87           | 27.6  | 447       | 20.4 | 502   | 41.0 | 112   | 56.2 |
| <b>Latin America</b> |                     |         |                   |      |       |      |           |      |              |      |              |       |           |      |       |      |       |      |
| BO                   | Bolivia 1994        | 1       | 4,086             | 9.0  | 776   | 13.8 | 3,310     | 7.9  | 3,651        | 9.2  | 435          | 7.6   | 1,625     | 6.9  | 1,806 | 10.4 | 655   | 10.5 |
| BO                   | Bolivia 2008        | 1       | 6,217             | 12.9 | 1,522 | 15.5 | 4,695     | 12.1 | 5,150        | 13.1 | 1,067        | 12.0  | 2,618     | 10.6 | 2,578 | 13.3 | 1,021 | 18.1 |
| BR                   | Brazil 1996         | 2       | 3,386             | 13.6 | 697   | 16.8 | 2,689     | 12.7 | 2,699        | 13.0 | 687          | 15.7  | 1,658     | 12.5 | 1,326 | 11.7 | 402   | 24.1 |
| CO                   | Colombia 1990       | 2       | 2,684             | 12.5 | 521   | 17.1 | 2,163     | 11.4 | 2,312        | 13.1 | 372          | 8.6   | 1,344     | 10.5 | 1,079 | 13.1 | 261   | 20.7 |
| CO                   | Colombia 1995       | 1       | 3,543             | 11.3 | 965   | 14.5 | 2,578     | 10.1 | 2,867        | 11.6 | 675          | 9.9   | 1,751     | 10.0 | 1,420 | 11.7 | 372   | 15.9 |
| CO                   | Colombia 2000       | 2       | 3,350             | 15.7 | 1,119 | 16.9 | 2,230     | 15.2 | 2,489        | 15.2 | 861          | 17.1  | 1,613     | 13.3 | 1,353 | 15.7 | 384   | 26.0 |
| CO                   | Colombia 2005       | 2       | 10,185            | 17.8 | 2,937 | 21.5 | 7,248     | 16.3 | 7,425        | 16.7 | 2,760        | 20.7  | 5,200     | 16.2 | 3,746 | 17.4 | 1,239 | 25.8 |
| CO                   | Colombia 2010       | 2       | 11,639            | 17.8 | 2,543 | 21.0 | 9,096     | 16.9 | 8,714        | 18.2 | 2,925        | 16.7  | 5,995     | 15.8 | 4,303 | 17.8 | 1,341 | 26.5 |
| CO                   | Colombia 2015       | 2       | 7,807             | 15.4 | 1,582 | 19.3 | 6,224     | 14.4 | 5,908        | 15.3 | 1,899        | 15.7  | 3,913     | 13.2 | 3,099 | 16.5 | 795   | 22.3 |
| DR                   | Dominican Rep. 1991 | 2       | 2,877             | 14.4 | 327   | 21.7 | 2,549     | 13.5 | 2,722        | 14.4 | 155          | 14.2  | 1,534     | 10.7 | 1,145 | 17.9 | 198   | 22.7 |
| DR                   | Dominican Rep. 1996 | 2       | 3,255             | 16.8 | 398   | 19.1 | 2,857     | 16.5 | 2,933        | 15.9 | 322          | 25.2  | 1,818     | 15.4 | 1,234 | 17.2 | 203   | 26.6 |

| Code                            | Survey              | Cluster | Contraceptive use |      |       |      |           |      | Union status |      |              |      | Age-group |      |        |      |       |      |  |
|---------------------------------|---------------------|---------|-------------------|------|-------|------|-----------|------|--------------|------|--------------|------|-----------|------|--------|------|-------|------|--|
|                                 |                     |         | Total             |      | Using |      | Not using |      | In-union     |      | Not-in-union |      | 15-24     |      | 25-34  |      | 35-49 |      |  |
|                                 |                     |         | P                 | T    | P     | T    | P         | T    | P            | T    | P            | T    | P         | T    | P      | T    | P     | T    |  |
| DR                              | Dominican Rep. 1999 | 2       | 435               | 21.8 | 60    | 20.0 | 375       | 22.1 | 394          | 18.5 | 41           | 53.7 | 224       | 18.3 | 181    | 24.9 | 30    | 30.0 |  |
| DR                              | Dominican Rep. 2002 | 2       | 8,065             | 16.2 | 1,044 | 21.6 | 7,021     | 15.4 | 7,094        | 14.6 | 971          | 27.9 | 4,557     | 15.3 | 2,969  | 16.3 | 539   | 22.4 |  |
| GU                              | Guatemala 1995      | 1       | 6,179             | 6.0  | 245   | 11.0 | 5,934     | 5.7  | 5,845        | 6.0  | 334          | 4.8  | 2,952     | 5.1  | 2,355  | 5.6  | 872   | 9.7  |  |
| GU                              | Guatemala 1998      | 1       | 2,988             | 5.9  | 197   | 11.2 | 2,791     | 5.4  | 2,736        | 5.7  | 252          | 7.1  | 1,451     | 4.5  | 1,125  | 6.7  | 412   | 8.5  |  |
| GU                              | Guatemala 2014      | 1       | 8,300             | 7.8  | 935   | 10.8 | 7,365     | 7.5  | 7,313        | 8.0  | 987          | 6.8  | 4,193     | 6.3  | 3,179  | 8.2  | 928   | 13.7 |  |
| GY                              | Guyana 2009         | 2       | 1,567             | 21.8 | 195   | 34.9 | 1,372     | 20.0 | 1,254        | 22.2 | 313          | 20.1 | 768       | 15.5 | 583    | 25.2 | 216   | 35.2 |  |
| HN                              | Honduras 2005       | 1       | 6,767             | 9.1  | 1,053 | 12.5 | 5,713     | 8.4  | 6,241        | 9.0  | 526          | 10.1 | 3,417     | 7.1  | 2,545  | 8.8  | 805   | 18.1 |  |
| HN                              | Honduras 2011       | 1       | 7,120             | 9.8  | 757   | 14.3 | 6,363     | 9.3  | 6,281        | 10.2 | 838          | 6.8  | 3,709     | 8.1  | 2,658  | 9.8  | 753   | 18.5 |  |
| NC                              | Nicaragua 1998      | 1       | 5,145             | 8.0  | 469   | 12.4 | 4,677     | 7.5  | 4,860        | 7.8  | 285          | 10.9 | 2,781     | 7.3  | 1,828  | 8.2  | 536   | 10.8 |  |
| PE                              | Peru 1991           | 1       | 5,696             | 10.2 | 1,643 | 13.1 | 4,053     | 9.0  | 4,993        | 10.2 | 703          | 10.4 | 2,342     | 6.8  | 2,473  | 11.0 | 881   | 17.0 |  |
| PE                              | Peru 1996           | 1       | 10,459            | 10.0 | 3,037 | 12.4 | 7,422     | 9.1  | 9,026        | 10.0 | 1,433        | 10.1 | 4,453     | 7.9  | 4,347  | 10.6 | 1,659 | 14.4 |  |
| PE                              | Peru 2000           | 1       | 8,027             | 10.3 | 1,976 | 13.9 | 6,052     | 9.1  | 6,565        | 10.0 | 1,462        | 11.5 | 3,310     | 7.8  | 3,406  | 10.8 | 1,311 | 15.1 |  |
| PE                              | Peru 2004           | 1       | 4,531             | 11.3 | 1,249 | 14.7 | 3,282     | 10.0 | 3,667        | 11.0 | 864          | 12.6 | 1,813     | 9.7  | 1,917  | 10.4 | 801   | 17.0 |  |
| PE                              | Peru 2007           | 2       | 5,949             | 14.0 | 1,810 | 17.6 | 4,139     | 12.4 | 4,762        | 14.0 | 1,187        | 14.1 | 2,385     | 12.0 | 2,548  | 13.1 | 1,016 | 20.9 |  |
| PE                              | Peru 2009           | 2       | 6,514             | 14.0 | 2,026 | 17.8 | 4,488     | 12.3 | 5,239        | 12.9 | 1,275        | 18.6 | 2,513     | 12.8 | 2,839  | 12.8 | 1,162 | 19.8 |  |
| PE                              | Peru 2010           | 2       | 6,115             | 15.8 | 1,906 | 21.2 | 4,209     | 13.3 | 4,930        | 14.8 | 1,185        | 19.8 | 2,419     | 12.6 | 2,606  | 15.5 | 1,090 | 23.4 |  |
| PE                              | Peru 2011           | 2       | 6,109             | 15.1 | 1,963 | 20.2 | 4,146     | 12.7 | 4,905        | 14.0 | 1,204        | 19.8 | 2,297     | 13.3 | 2,709  | 14.2 | 1,103 | 21.3 |  |
| PY                              | Paraguay 1990       | 1       | 2,789             | 10.9 | 414   | 19.8 | 2,375     | 9.3  | 2,453        | 11.3 | 336          | 8.3  | 1,088     | 8.4  | 1,212  | 11.1 | 489   | 16.0 |  |
| <b>South and Southeast Asia</b> |                     |         |                   |      |       |      |           |      |              |      |              |      |           |      |        |      |       |      |  |
| IA                              | India 2005          | 2       | 38,223            | 12.2 | 1,591 | 27.9 | 36,632    | 11.5 | 38,134       | 12.1 | 89           | 22.5 | 23,470    | 11.0 | 13,046 | 13.5 | 1,707 | 18.1 |  |
| ID                              | Indonesia 2012      | 1       | 11,858            | 10.6 | 843   | 11.6 | 11,016    | 10.5 | 11,369       | 10.8 | 489          | 6.1  | 4,052     | 8.3  | 5,788  | 9.9  | 2,018 | 17.3 |  |
| KH                              | Cambodia 2010       | 3       | 6,514             | 21.6 | 409   | 49.1 | 6,105     | 19.7 | 6,359        | 21.7 | 155          | 17.4 | 2,545     | 15.1 | 2,859  | 20.4 | 1,110 | 39.5 |  |
| KH                              | Cambodia 2014       | 3       | 5,985             | 23.9 | 584   | 53.3 | 5,401     | 20.7 | 5,863        | 23.9 | 122          | 24.6 | 2,401     | 17.2 | 2,860  | 23.7 | 724   | 47.0 |  |
| NP                              | Nepal 2011          | 2       | 3,848             | 14.9 | 191   | 40.3 | 3,657     | 13.6 | 3,807        | 14.9 | 41           | 14.6 | 2,158     | 10.9 | 1,401  | 19.2 | 289   | 23.9 |  |
| NP                              | Nepal 2016          | 3       | 3,749             | 19.8 | 187   | 41.7 | 3,563     | 18.6 | 3,713        | 19.9 | 36           | 5.6  | 2,196     | 14.9 | 1,358  | 24.0 | 195   | 44.6 |  |
| PH                              | Philippines 1993    | 1       | 6,144             | 9.7  | 749   | 12.1 | 5,395     | 9.3  | 5,842        | 9.8  | 302          | 7.3  | 2,143     | 8.0  | 2,939  | 8.5  | 1,062 | 16.2 |  |
| PH                              | Philippines 1998    | 1       | 5,229             | 10.7 | 1,007 | 11.4 | 4,221     | 10.6 | 4,910        | 10.9 | 319          | 8.2  | 1,770     | 9.1  | 2,544  | 9.2  | 915   | 18.1 |  |

| Code | Survey           | Cluster | Total |      | Contraceptive use |      |           |      | Union status |      |              |     | Age-group |     |       |     |       |      |
|------|------------------|---------|-------|------|-------------------|------|-----------|------|--------------|------|--------------|-----|-----------|-----|-------|-----|-------|------|
|      |                  |         | Total |      | Using             |      | Not using |      | In-union     |      | Not-in-union |     | 15-24     |     | 25-34 |     | 35-49 |      |
|      |                  |         | P     | T    | P                 | T    | P         | T    | P            | T    | P            | T   | P         | T   | P     | T   | P     | T    |
| PH   | Philippines 2003 | 1       | 4,787 | 10.4 | 655               | 10.8 | 4,133     | 10.4 | 4,414        | 10.8 | 373          | 5.6 | 1,747     | 8.7 | 2,183 | 9.2 | 857   | 17.0 |
| TL   | Timor Leste 2009 | 1       | 6,225 | 2.9  | 31                | 6.5  | 6,194     | 2.9  | 6,109        | 2.8  | 117          | 6.8 | 2,041     | 2.8 | 2,728 | 2.5 | 1,456 | 3.7  |
| TL   | Timor Leste 2016 | 1       | 4,680 | 3.4  | 16                | 0.0  | 4,664     | 3.4  | 4,449        | 3.4  | 231          | 2.6 | 1,616     | 4.0 | 2,340 | 2.7 | 724   | 4.3  |
