# Supplementary material for: Reported patterns of pregnancy termination from Demographic and Health Surveys
Source: PubMed Central journal article supplement (PMC6699730; doi:10.1371/journal.pone.0221178), 2019-08-19
Supplement: pone.0221178.s006.pdf [file pone.0221178.s006.pdf]

|                          | 15-19 | 20-24 | 25-29 | 30-34 | 35-39 | 40-44 | 45-49 |
|--------------------------|-------|-------|-------|-------|-------|-------|-------|
| <b>Africa</b>            |       |       |       |       |       |       |       |
| <b>Angola 2015</b>       |       |       |       |       |       |       |       |
| Using                    | 0.0   | 36.8  | 0.0   | 0.0   | 0.0   |       |       |
| Not using                | 6.7   | 6.2   | 5.3   | 6.3   | 7.3   | 15.7  | 15.7  |
| All                      | 6.6   | 6.5   | 5.2   | 6.3   | 7.3   | 15.7  | 15.7  |
| ASTR                     | 12.0  | 18.0  | 15.0  | 16.0  | 15.0  | 17.0  | 4.0   |
| <b>Burkina Faso 2010</b> |       |       |       |       |       |       |       |
| Using                    | 2.6   | 22.8  | 6.1   | 18.5  | 20.1  |       |       |
| Not using                | 7.2   | 4.3   | 3.7   | 4.7   | 4.7   | 9.0   | 9.0   |
| All                      | 7.2   | 4.4   | 3.7   | 4.8   | 4.8   | 9.0   | 9.0   |
| ASTR                     | 10.0  | 12.0  | 10.0  | 12.0  | 10.0  | 9.0   | 2.0   |
| <b>Benin 2011</b>        |       |       |       |       |       |       |       |
| Using                    | 0.0   | 9.8   | 0.0   | 23.3  | 0.0   | 60.3  | 60.3  |
| Not using                | 4.5   | 3.6   | 3.1   | 4.0   | 5.5   | 3.4   | 3.4   |
| All                      | 4.5   | 3.6   | 3.1   | 4.1   | 5.4   | 4.0   | 4.0   |
| ASTR                     | 4.0   | 9.0   | 8.0   | 9.0   | 7.0   | 3.0   | 1.0   |
| <b>Burundi 2010</b>      |       |       |       |       |       |       |       |
| Using                    | 0.0   | 11.1  | 0.0   | 2.8   | 0.0   | 42.2  | 42.2  |
| Not using                | 10.8  | 6.1   | 4.4   | 6.9   | 8.8   | 18.1  | 18.1  |
| All                      | 10.8  | 6.1   | 4.3   | 6.8   | 8.6   | 19.0  | 19.0  |
| ASTR                     | 8.0   | 18.0  | 14.0  | 20.0  | 21.0  | 24.0  | 7.0   |
| <b>Burundi 2016</b>      |       |       |       |       |       |       |       |
| Using                    | 0.0   | 4.9   | 0.0   | 6.4   | 13.0  | 15.6  | 15.6  |
| Not using                | 8.6   | 7.6   | 6.5   | 6.7   | 10.8  | 16.9  | 16.9  |
| All                      | 8.6   | 7.6   | 6.4   | 6.7   | 10.9  | 16.8  | 16.8  |
| ASTR                     | 5.0   | 18.0  | 18.0  | 18.0  | 23.0  | 20.0  | 4.0   |
| <b>Ethiopia 2005</b>     |       |       |       |       |       |       |       |
| Using                    | 6.5   | 28.9  | 15.9  | 17.5  | 21.9  | 81.3  | 81.3  |
| Not using                | 3.2   | 4.4   | 3.2   | 4.1   | 4.9   | 9.1   | 9.1   |
| All                      | 3.2   | 4.7   | 3.3   | 4.1   | 5.2   | 9.6   | 9.6   |
| ASTR                     | 3.0   | 11.0  | 8.0   | 10.0  | 9.0   | 9.0   | 4.0   |
| <b>Ethiopia 2011</b>     |       |       |       |       |       |       |       |
| Using                    | 2.9   | 6.3   | 6.2   | 9.1   | 3.8   | 59.3  | 59.3  |
| Not using                | 6.5   | 6.5   | 3.3   | 5.6   | 8.8   | 15.9  | 15.9  |
| All                      | 6.4   | 6.5   | 3.4   | 5.7   | 8.6   | 16.9  | 16.9  |
| ASTR                     | 5.0   | 14.0  | 8.0   | 12.0  | 14.0  | 14.0  | 6.0   |
| <b>Ethiopia 2016</b>     |       |       |       |       |       |       |       |
| Using                    | 41.4  | 3.8   | 18.7  | 12.1  | 4.1   |       |       |
| Not using                | 5.0   | 3.7   | 4.5   | 5.3   | 6.7   | 14.8  | 14.8  |
| All                      | 5.3   | 3.7   | 4.7   | 5.4   | 6.7   | 14.8  | 14.8  |
| ASTR                     | 4.0   | 8.0   | 10.0  | 11.0  | 10.0  | 12.0  | 4.0   |
| <b>Ghana 2008</b>        |       |       |       |       |       |       |       |
| Using                    | 20.0  | 20.8  | 20.0  | 9.4   | 19.0  | 0.0   | 0.0   |
| Not using                | 17.1  | 14.2  | 9.9   | 15.0  | 13.8  | 20.7  | 20.7  |
| All                      | 17.3  | 14.7  | 10.8  | 14.6  | 14.3  | 19.7  | 19.7  |
| ASTR                     | 14.0  | 30.0  | 25.0  | 30.0  | 20.0  | 14.0  | 2.0   |

|                     | 15-19 | 20-24 | 25-29 | 30-34 | 35-39 | 40-44 | 45-49 |
|---------------------|-------|-------|-------|-------|-------|-------|-------|
| <b>Ghana 2014</b>   |       |       |       |       |       |       |       |
| Using               | 10.3  | 46.4  | 40.5  | 15.8  | 21.6  | 23.7  | 23.7  |
| Not using           | 19.5  | 20.1  | 14.5  | 15.9  | 18.4  | 22.7  | 22.7  |
| All                 | 19.2  | 21.3  | 15.7  | 15.9  | 18.5  | 22.8  | 22.8  |
| ASTR                | 18.0  | 44.0  | 37.0  | 37.0  | 31.0  | 15.0  | 5.0   |
| <b>Kenya 1998</b>   |       |       |       |       |       |       |       |
| Using               | 9.2   | 0.9   | 4.9   | 2.9   | 26.0  | 0.0   | 0.0   |
| Not using           | 6.0   | 5.0   | 5.7   | 5.5   | 5.3   | 10.5  | 10.5  |
| All                 | 6.2   | 4.6   | 5.6   | 5.2   | 6.6   | 9.5   | 9.5   |
| ASTR                | 7.0   | 12.0  | 13.0  | 10.0  | 8.0   | 5.0   | 2.0   |
| <b>Kenya 2003</b>   |       |       |       |       |       |       |       |
| Using               | 12.1  | 6.9   | 2.5   | 5.0   | 10.6  | 4.0   | 4.0   |
| Not using           | 6.2   | 5.3   | 3.7   | 5.4   | 8.2   | 9.7   | 9.7   |
| All                 | 6.6   | 5.4   | 3.6   | 5.4   | 8.5   | 9.3   | 9.3   |
| ASTR                | 8.0   | 14.0  | 9.0   | 11.0  | 11.0  | 6.0   | 2.0   |
| <b>Kenya 2008</b>   |       |       |       |       |       |       |       |
| Using               | 3.2   | 7.0   | 5.5   | 4.1   | 4.2   | 15.7  | 15.7  |
| Not using           | 3.1   | 4.2   | 6.3   | 5.2   | 12.4  | 18.8  | 18.8  |
| All                 | 3.1   | 4.5   | 6.2   | 5.0   | 11.3  | 18.4  | 18.4  |
| ASTR                | 3.0   | 11.0  | 14.0  | 9.0   | 15.0  | 11.0  | 3.0   |
| <b>Comoros 2012</b> |       |       |       |       |       |       |       |
| Using               | 0.0   | 0.0   | 2.8   | 0.0   | 0.0   | 100.0 | 100.0 |
| Not using           | 5.3   | 5.1   | 7.9   | 6.6   | 12.0  | 18.1  | 18.1  |
| All                 | 5.3   | 5.0   | 7.9   | 6.4   | 11.9  | 18.8  | 18.8  |
| ASTR                | 4.0   | 9.0   | 17.0  | 14.0  | 18.0  | 15.0  | 7.0   |
| <b>Liberia 2013</b> |       |       |       |       |       |       |       |
| Using               | 29.6  | 37.5  | 38.9  | 56.4  | 36.4  | 45.1  | 45.1  |
| Not using           | 8.2   | 10.8  | 12.2  | 11.7  | 11.8  | 27.0  | 27.0  |
| All                 | 8.7   | 11.2  | 12.9  | 12.2  | 12.6  | 27.4  | 27.4  |
| ASTR                | 14.0  | 28.0  | 30.0  | 25.0  | 19.0  | 19.0  | 5.0   |
| <b>Lesotho 2009</b> |       |       |       |       |       |       |       |
| Using               | 4.4   | 8.6   | 2.8   | 6.2   | 10.5  | 29.7  | 29.7  |
| Not using           | 4.4   | 5.2   | 4.3   | 5.9   | 10.0  | 4.0   | 4.0   |
| All                 | 4.4   | 5.5   | 4.1   | 5.9   | 10.1  | 5.6   | 5.6   |
| ASTR                | 4.0   | 10.0  | 7.0   | 7.0   | 8.0   | 2.0   | 0.0   |
| <b>Lesotho 2014</b> |       |       |       |       |       |       |       |
| Using               | 13.9  | 1.3   | 3.1   | 11.3  | 6.5   | 6.2   | 6.2   |
| Not using           | 6.3   | 6.8   | 9.8   | 10.5  | 12.7  | 12.8  | 12.8  |
| All                 | 7.0   | 6.2   | 9.0   | 10.6  | 11.6  | 12.0  | 12.0  |
| ASTR                | 7.0   | 12.0  | 14.0  | 13.0  | 9.0   | 7.0   | 1.0   |
| <b>Morocco 1992</b> |       |       |       |       |       |       |       |
| Using               | 11.1  | 4.6   | 9.0   | 9.4   | 13.4  | 25.5  | 25.5  |
| Not using           | 9.0   | 7.2   | 7.6   | 8.6   | 8.9   | 8.5   | 8.5   |
| All                 | 9.1   | 7.0   | 7.8   | 8.7   | 9.7   | 11.7  | 11.7  |
| ASTR                | 4.0   | 10.0  | 15.0  | 17.0  | 15.0  | 11.0  | 5.0   |
| <b>Morocco 2003</b> |       |       |       |       |       |       |       |
| Using               | 18.1  | 11.1  | 10.2  | 12.3  | 15.8  | 21.8  | 21.8  |

|                        | 15-19 | 20-24 | 25-29 | 30-34 | 35-39 | 40-44 | 45-49 |
|------------------------|-------|-------|-------|-------|-------|-------|-------|
| Not using              | 10.1  | 8.5   | 8.4   | 11.7  | 16.9  | 29.8  | 29.8  |
| All                    | 10.7  | 8.9   | 8.8   | 11.8  | 16.6  | 27.2  | 27.2  |
| ASTR                   | 4.0   | 10.0  | 12.0  | 17.0  | 15.0  | 10.0  | 2.0   |
| <b>Madagascar 2008</b> |       |       |       |       |       |       |       |
| Using                  | 18.9  | 9.2   | 14.2  | 12.4  | 10.8  | 21.1  | 21.1  |
| Not using              | 7.0   | 6.2   | 6.5   | 6.8   | 7.5   | 11.4  | 11.4  |
| All                    | 7.5   | 6.4   | 7.1   | 7.2   | 7.8   | 11.8  | 11.8  |
| ASTR                   | 12.0  | 16.0  | 16.0  | 13.0  | 11.0  | 8.0   | 2.0   |
| <b>Mali 2012</b>       |       |       |       |       |       |       |       |
| Using                  |       | 0.0   | 11.5  | 0.0   | 0.0   |       |       |
| Not using              | 4.4   | 3.7   | 3.8   | 3.4   | 4.6   | 7.2   | 7.2   |
| All                    | 4.4   | 3.7   | 3.8   | 3.4   | 4.6   | 7.2   | 7.2   |
| ASTR                   | 8.0   | 10.0  | 11.0  | 8.0   | 8.0   | 7.0   | 3.0   |
| <b>Malawi 2004</b>     |       |       |       |       |       |       |       |
| Using                  | 14.9  | 0.6   | 0.0   | 7.5   | 6.0   | 5.1   | 5.1   |
| Not using              | 5.8   | 4.3   | 4.1   | 5.0   | 7.2   | 6.9   | 6.9   |
| All                    | 5.9   | 4.2   | 4.0   | 5.1   | 7.1   | 6.7   | 6.7   |
| ASTR                   | 10.0  | 13.0  | 11.0  | 12.0  | 12.0  | 6.0   | 3.0   |
| <b>Malawi 2010</b>     |       |       |       |       |       |       |       |
| Using                  | 5.3   | 2.4   | 3.1   | 5.8   | 5.5   | 4.5   | 4.5   |
| Not using              | 7.3   | 3.9   | 5.5   | 5.4   | 5.3   | 13.1  | 13.1  |
| All                    | 7.3   | 3.7   | 5.3   | 5.4   | 5.3   | 12.6  | 12.6  |
| ASTR                   | 12.0  | 10.0  | 13.0  | 12.0  | 9.0   | 12.0  | 5.0   |
| <b>Malawi 2015</b>     |       |       |       |       |       |       |       |
| Using                  | 7.8   | 2.5   | 8.0   | 10.0  | 3.3   | 0.0   | 0.0   |
| Not using              | 6.5   | 5.4   | 5.4   | 4.3   | 5.7   | 10.0  | 10.0  |
| All                    | 6.5   | 5.3   | 5.4   | 4.5   | 5.7   | 9.9   | 9.9   |
| ASTR                   | 9.0   | 12.0  | 11.0  | 7.0   | 7.0   | 6.0   | 2.0   |
| <b>Mozambique 2011</b> |       |       |       |       |       |       |       |
| Using                  | 20.4  | 41.1  | 3.8   | 0.0   | 17.7  | 19.5  | 19.5  |
| Not using              | 8.4   | 5.4   | 5.8   | 4.5   | 6.1   | 8.6   | 8.6   |
| All                    | 8.5   | 5.7   | 5.8   | 4.5   | 6.1   | 8.7   | 8.7   |
| ASTR                   | 16.0  | 16.0  | 16.0  | 10.0  | 11.0  | 8.0   | 3.0   |
| <b>Nigeria 2008</b>    |       |       |       |       |       |       |       |
| Using                  | 28.5  | 17.4  | 6.9   | 9.5   | 14.8  | 10.0  | 10.0  |
| Not using              | 6.8   | 6.6   | 5.1   | 6.5   | 9.9   | 11.3  | 11.3  |
| All                    | 7.5   | 7.1   | 5.2   | 6.7   | 10.2  | 11.3  | 11.3  |
| ASTR                   | 10.0  | 17.0  | 15.0  | 17.0  | 18.0  | 11.0  | 6.0   |
| <b>Nigeria 2013</b>    |       |       |       |       |       |       |       |
| Using                  | 39.5  | 21.5  | 12.0  | 8.0   | 26.7  | 20.8  | 20.8  |
| Not using              | 7.1   | 6.3   | 6.6   | 7.3   | 9.3   | 13.0  | 13.0  |
| All                    | 7.5   | 6.5   | 6.7   | 7.3   | 9.8   | 13.2  | 13.2  |
| ASTR                   | 10.0  | 16.0  | 18.0  | 19.0  | 17.0  | 12.0  | 4.0   |
| <b>Niger 2012</b>      |       |       |       |       |       |       |       |
| Using                  | 22.0  | 0.0   | 8.5   | 0.0   | 0.0   |       |       |
| Not using              | 9.0   | 3.8   | 5.8   | 7.9   | 9.5   | 17.3  | 17.3  |
| All                    | 9.0   | 3.8   | 5.8   | 7.9   | 9.4   | 17.3  | 17.3  |

|                          | 15-19 | 20-24 | 25-29 | 30-34 | 35-39 | 40-44 | 45-49 |
|--------------------------|-------|-------|-------|-------|-------|-------|-------|
| ASTR                     | 20.0  | 13.0  | 20.0  | 24.0  | 23.0  | 21.0  | 10.0  |
| <b>Namibia 2006</b>      |       |       |       |       |       |       |       |
| Using                    | 3.4   | 1.4   | 5.1   | 4.3   | 4.6   | 27.6  | 27.6  |
| Not using                | 3.1   | 4.1   | 4.4   | 6.4   | 8.6   | 14.5  | 14.5  |
| All                      | 3.2   | 3.9   | 4.5   | 6.2   | 8.4   | 15.3  | 15.3  |
| ASTR                     | 3.0   | 7.0   | 7.0   | 10.0  | 10.0  | 8.0   | 1.0   |
| <b>Namibia 2013</b>      |       |       |       |       |       |       |       |
| Using                    | 2.7   | 2.5   | 7.5   | 5.5   | 6.8   | 6.7   | 6.7   |
| Not using                | 3.5   | 5.4   | 9.3   | 7.0   | 7.8   | 17.9  | 17.9  |
| All                      | 3.4   | 5.1   | 9.1   | 6.8   | 7.7   | 17.0  | 17.0  |
| ASTR                     | 3.0   | 9.0   | 17.0  | 11.0  | 9.0   | 9.0   | 2.0   |
| <b>Rwanda 2010</b>       |       |       |       |       |       |       |       |
| Using                    | 52.3  | 4.0   | 3.2   | 11.8  | 12.4  | 17.7  | 17.7  |
| Not using                | 4.5   | 7.4   | 5.5   | 5.2   | 8.1   | 17.7  | 17.7  |
| All                      | 4.8   | 7.4   | 5.4   | 5.6   | 8.4   | 17.7  | 17.7  |
| ASTR                     | 2.0   | 15.0  | 13.0  | 12.0  | 14.0  | 19.0  | 4.0   |
| <b>Rwanda 2014</b>       |       |       |       |       |       |       |       |
| Using                    | 0.0   | 3.7   | 8.6   | 11.1  | 17.5  | 17.1  | 17.1  |
| Not using                | 6.4   | 7.2   | 5.9   | 7.9   | 9.9   | 16.0  | 16.0  |
| All                      | 6.3   | 7.1   | 6.0   | 8.2   | 10.9  | 16.1  | 16.1  |
| ASTR                     | 3.0   | 14.0  | 14.0  | 17.0  | 16.0  | 13.0  | 2.0   |
| <b>Sierra Leone 2008</b> |       |       |       |       |       |       |       |
| Using                    | 47.1  | 6.4   | 8.2   | 0.0   | 0.0   | 100.0 | 100.0 |
| Not using                | 6.1   | 5.8   | 6.2   | 6.1   | 6.3   | 10.1  | 10.1  |
| All                      | 6.5   | 5.8   | 6.2   | 6.0   | 6.2   | 11.2  | 11.2  |
| ASTR                     | 10.0  | 14.0  | 14.0  | 12.0  | 10.0  | 9.0   | 5.0   |
| <b>Sierra Leone 2013</b> |       |       |       |       |       |       |       |
| Using                    | 21.5  | 12.0  | 13.3  | 52.5  | 11.2  | 59.7  | 59.7  |
| Not using                | 6.8   | 5.9   | 6.1   | 5.8   | 8.2   | 10.7  | 10.7  |
| All                      | 7.0   | 6.0   | 6.2   | 6.2   | 8.3   | 11.4  | 11.4  |
| ASTR                     | 9.0   | 14.0  | 15.0  | 12.0  | 13.0  | 8.0   | 4.0   |
| <b>Senegal 2012</b>      |       |       |       |       |       |       |       |
| Using                    |       | 7.7   | 0.0   | 11.4  | 0.0   | 41.0  | 41.0  |
| Not using                | 11.5  | 8.3   | 8.2   | 7.3   | 10.4  | 17.2  | 17.2  |
| All                      | 11.5  | 8.3   | 8.2   | 7.4   | 10.3  | 17.6  | 17.6  |
| ASTR                     | 10.0  | 19.0  | 22.0  | 18.0  | 21.0  | 21.0  | 4.0   |
| <b>Senegal 2014</b>      |       |       |       |       |       |       |       |
| Using                    |       | 0.0   | 19.2  | 0.0   | 0.0   | 0.0   | 0.0   |
| Not using                | 6.8   | 7.7   | 6.5   | 11.0  | 10.5  | 10.3  | 10.3  |
| All                      | 6.8   | 7.6   | 6.6   | 11.0  | 10.5  | 10.2  | 10.2  |
| ASTR                     | 7.0   | 16.0  | 17.0  | 26.0  | 18.0  | 11.0  | 2.0   |
| <b>Senegal 2015</b>      |       |       |       |       |       |       |       |
| Using                    | 0.0   | 0.0   | 48.0  | 0.0   | 14.6  | 23.1  | 23.1  |
| Not using                | 8.8   | 6.2   | 5.9   | 9.7   | 15.5  | 20.8  | 20.8  |
| All                      | 8.7   | 6.1   | 6.3   | 9.5   | 15.5  | 20.8  | 20.8  |
| ASTR                     | 8.0   | 12.0  | 15.0  | 22.0  | 30.0  | 22.0  | 4.0   |
| <b>Senegal 2016</b>      |       |       |       |       |       |       |       |

|                      | 15-19 | 20-24 | 25-29 | 30-34 | 35-39 | 40-44 | 45-49 |
|----------------------|-------|-------|-------|-------|-------|-------|-------|
| Using                |       | 4.7   | 0.0   | 16.6  | 6.6   | 36.6  | 36.6  |
| Not using            | 7.0   | 7.9   | 6.2   | 10.6  | 14.1  | 17.5  | 17.5  |
| All                  | 7.0   | 7.9   | 6.1   | 10.8  | 13.7  | 17.9  | 17.9  |
| ASTR                 | 5.0   | 16.0  | 15.0  | 24.0  | 23.0  | 17.0  | 5.0   |
| <b>Senegal 2017</b>  |       |       |       |       |       |       |       |
| Using                | 0.0   | 0.0   | 7.5   | 4.3   | 10.7  | 0.0   | 0.0   |
| Not using            | 9.9   | 8.1   | 8.0   | 9.7   | 15.7  | 21.1  | 21.1  |
| All                  | 9.9   | 8.1   | 8.0   | 9.6   | 15.6  | 20.8  | 20.8  |
| ASTR                 | 9.0   | 16.0  | 19.0  | 22.0  | 27.0  | 21.0  | 6.0   |
| <b>Tanzania 2004</b> |       |       |       |       |       |       |       |
| Using                | 0.0   | 11.1  | 18.3  | 12.9  | 7.6   | 31.2  | 31.2  |
| Not using            | 9.4   | 6.2   | 7.1   | 8.5   | 11.1  | 23.2  | 23.2  |
| All                  | 9.3   | 6.3   | 7.8   | 8.7   | 10.9  | 23.5  | 23.5  |
| ASTR                 | 14.0  | 19.0  | 21.0  | 21.0  | 19.0  | 24.0  | 6.0   |
| <b>Tanzania 2010</b> |       |       |       |       |       |       |       |
| Using                | 0.0   | 3.3   | 3.2   | 5.8   | 7.5   | 4.4   | 4.4   |
| Not using            | 7.0   | 7.8   | 6.8   | 7.1   | 12.8  | 17.1  | 17.1  |
| All                  | 6.8   | 7.6   | 6.6   | 7.0   | 12.5  | 15.9  | 15.9  |
| ASTR                 | 9.0   | 21.0  | 18.0  | 16.0  | 23.0  | 14.0  | 4.0   |
| <b>Tanzania 2015</b> |       |       |       |       |       |       |       |
| Using                | 23.5  | 5.9   | 13.9  | 11.5  | 10.2  | 15.5  | 15.5  |
| Not using            | 8.8   | 8.1   | 9.3   | 8.6   | 12.0  | 20.1  | 20.1  |
| All                  | 9.2   | 8.0   | 9.6   | 8.8   | 11.9  | 19.7  | 19.7  |
| ASTR                 | 13.0  | 21.0  | 25.0  | 19.0  | 20.0  | 18.0  | 4.0   |
| <b>Uganda 2006</b>   |       |       |       |       |       |       |       |
| Using                | 14.0  | 8.9   | 8.7   | 7.7   | 25.1  | 29.2  | 29.2  |
| Not using            | 11.5  | 7.1   | 6.5   | 9.3   | 13.9  | 23.5  | 23.5  |
| All                  | 11.6  | 7.2   | 6.6   | 9.2   | 14.6  | 23.6  | 23.6  |
| ASTR                 | 20.0  | 24.0  | 22.0  | 26.0  | 33.0  | 29.0  | 8.0   |
| <b>Uganda 2011</b>   |       |       |       |       |       |       |       |
| Using                | 3.3   | 10.9  | 5.7   | 4.4   | 18.2  | 55.6  | 55.6  |
| Not using            | 13.0  | 7.3   | 8.2   | 8.6   | 12.9  | 25.3  | 25.3  |
| All                  | 12.7  | 7.5   | 8.1   | 8.3   | 13.1  | 26.6  | 26.6  |
| ASTR                 | 19.0  | 25.0  | 25.0  | 21.0  | 26.0  | 27.0  | 8.0   |
| <b>Uganda 2016</b>   |       |       |       |       |       |       |       |
| Using                | 12.9  | 18.4  | 13.6  | 17.2  | 27.3  | 17.7  | 17.7  |
| Not using            | 10.4  | 9.3   | 8.3   | 10.9  | 14.9  | 25.7  | 25.7  |
| All                  | 10.4  | 9.6   | 8.6   | 11.2  | 15.5  | 25.2  | 25.2  |
| ASTR                 | 15.0  | 28.0  | 23.0  | 26.0  | 27.0  | 23.0  | 5.0   |
| <b>Zambia 2007</b>   |       |       |       |       |       |       |       |
| Using                | 11.3  | 6.1   | 4.9   | 10.9  | 2.3   | 0.0   | 0.0   |
| Not using            | 6.8   | 5.3   | 6.5   | 5.3   | 6.0   | 11.2  | 11.2  |
| All                  | 7.0   | 5.4   | 6.3   | 6.0   | 5.5   | 10.1  | 10.1  |
| ASTR                 | 11.0  | 16.0  | 18.0  | 15.0  | 11.0  | 10.0  | 3.0   |
| <b>Zambia 2013</b>   |       |       |       |       |       |       |       |
| Using                | 3.2   | 2.6   | 3.4   | 2.6   | 14.6  | 3.0   | 3.0   |
| Not using            | 5.6   | 5.3   | 4.6   | 5.4   | 6.8   | 13.9  | 13.9  |

|                                           | 15-19 | 20-24 | 25-29 | 30-34 | 35-39 | 40-44 | 45-49 |
|-------------------------------------------|-------|-------|-------|-------|-------|-------|-------|
| All                                       | 5.6   | 5.2   | 4.5   | 5.2   | 7.6   | 12.7  | 12.7  |
| ASTR                                      | 8.0   | 13.0  | 11.0  | 11.0  | 12.0  | 10.0  | 2.0   |
| <b>Zimbabwe 1994</b>                      |       |       |       |       |       |       |       |
| Using                                     | 4.4   | 6.0   | 10.2  | 9.6   | 14.2  | 22.8  | 22.8  |
| Not using                                 | 8.2   | 8.6   | 5.6   | 6.4   | 7.8   | 23.7  | 23.7  |
| All                                       | 7.9   | 8.3   | 6.1   | 6.7   | 8.9   | 23.5  | 23.5  |
| ASTR                                      | 9.0   | 19.0  | 13.0  | 12.0  | 11.0  | 16.0  | 4.0   |
| <b>Zimbabwe 1999</b>                      |       |       |       |       |       |       |       |
| Using                                     | 13.9  | 15.0  | 5.0   | 0.0   | 4.1   | 12.7  | 12.7  |
| Not using                                 | 8.6   | 7.1   | 7.0   | 6.8   | 11.2  | 18.0  | 18.0  |
| All                                       | 8.8   | 7.9   | 6.8   | 5.9   | 10.4  | 17.5  | 17.5  |
| ASTR                                      | 11.0  | 17.0  | 13.0  | 9.0   | 13.0  | 10.0  | 3.0   |
| <b>Zimbabwe 2005</b>                      |       |       |       |       |       |       |       |
| Using                                     | 26.3  | 2.2   | 4.9   | 2.6   | 6.7   | 22.6  | 22.6  |
| Not using                                 | 8.4   | 5.8   | 7.5   | 4.3   | 12.4  | 18.5  | 18.5  |
| All                                       | 9.3   | 5.4   | 7.2   | 4.1   | 11.8  | 19.0  | 19.0  |
| ASTR                                      | 10.0  | 12.0  | 13.0  | 6.0   | 12.0  | 10.0  | 3.0   |
| <b>Zimbabwe 2010</b>                      |       |       |       |       |       |       |       |
| Using                                     | 24.2  | 5.4   | 3.2   | 11.2  | 5.8   | 0.0   | 0.0   |
| Not using                                 | 7.8   | 5.2   | 7.5   | 8.5   | 7.9   | 7.6   | 7.6   |
| All                                       | 8.0   | 5.2   | 7.2   | 8.8   | 7.7   | 6.5   | 6.5   |
| ASTR                                      | 10.0  | 12.0  | 15.0  | 14.0  | 9.0   | 2.0   | 1.0   |
| <b>Zimbabwe 2015</b>                      |       |       |       |       |       |       |       |
| Using                                     | 0.0   | 4.1   | 8.3   | 9.7   | 11.8  | 10.0  | 10.0  |
| Not using                                 | 9.9   | 9.1   | 4.9   | 7.3   | 11.0  | 26.6  | 26.6  |
| All                                       | 9.6   | 8.6   | 5.2   | 7.6   | 11.1  | 24.7  | 24.7  |
| ASTR                                      | 12.0  | 19.0  | 11.0  | 12.0  | 13.0  | 11.0  | 2.0   |
| <b>Central and West Asia &amp; Europe</b> |       |       |       |       |       |       |       |
| <b>Albania 2008</b>                       |       |       |       |       |       |       |       |
| Using                                     | 0.0   | 22.9  | 14.6  | 19.9  | 23.9  |       |       |
| Not using                                 | 12.0  | 7.0   | 10.4  | 22.2  | 38.4  | 71.3  | 71.3  |
| All                                       | 11.2  | 9.9   | 11.4  | 21.5  | 35.8  | 71.3  | 71.3  |
| ASTR                                      | 2.0   | 10.0  | 16.0  | 18.0  | 8.0   | 2.0   | 0.0   |
| <b>Albania 2017</b>                       |       |       |       |       |       |       |       |
| Using                                     | 0.0   | 19.4  | 16.3  | 24.9  | 39.9  | 72.2  | 72.2  |
| Not using                                 | 5.8   | 7.0   | 7.0   | 7.4   | 19.5  | 38.9  | 38.9  |
| All                                       | 5.6   | 7.6   | 7.5   | 8.3   | 20.2  | 41.2  | 41.2  |
| ASTR                                      | 1.0   | 7.0   | 10.0  | 8.0   | 7.0   | 2.0   | 0.0   |
| <b>Armenia 2000</b>                       |       |       |       |       |       |       |       |
| Using                                     | 53.4  | 75.7  | 86.0  | 88.6  | 93.7  | 97.1  | 97.1  |
| Not using                                 | 19.1  | 30.7  | 50.3  | 73.0  | 74.6  | 86.7  | 86.7  |
| All                                       | 23.1  | 45.3  | 68.8  | 81.3  | 85.3  | 91.9  | 91.9  |
| ASTR                                      | 15.0  | 123.0 | 194.0 | 152.0 | 93.0  | 34.0  | 0.0   |
| <b>Armenia 2005</b>                       |       |       |       |       |       |       |       |
| Using                                     | 44.7  | 67.9  | 86.0  | 96.4  | 89.3  | 74.3  | 74.3  |
| Not using                                 | 19.4  | 24.1  | 44.2  | 59.1  | 72.3  | 85.0  | 85.0  |
| All                                       | 20.4  | 33.2  | 57.8  | 73.7  | 79.8  | 80.8  | 80.8  |

|                         | 15-19 | 20-24 | 25-29 | 30-34 | 35-39 | 40-44 | 45-49 |
|-------------------------|-------|-------|-------|-------|-------|-------|-------|
| ASTR                    | 8.0   | 74.0  | 147.0 | 104.0 | 63.0  | 17.0  |       |
| <b>Armenia 2010</b>     |       |       |       |       |       |       |       |
| Using                   | 6.1   | 49.1  | 69.2  | 72.7  | 75.5  | 89.1  | 89.1  |
| Not using               | 20.9  | 20.4  | 32.0  | 50.2  | 47.1  | 54.6  | 54.6  |
| All                     | 20.7  | 23.3  | 40.7  | 57.2  | 54.4  | 68.8  | 68.8  |
| ASTR                    | 7.0   | 42.0  | 70.0  | 56.0  | 29.0  | 11.0  |       |
| <b>Armenia 2015</b>     |       |       |       |       |       |       |       |
| Using                   | 75.2  | 56.0  | 76.7  | 78.3  | 95.5  | 91.8  | 91.8  |
| Not using               | 14.9  | 19.1  | 27.7  | 31.8  | 29.8  | 53.5  | 53.5  |
| All                     | 16.1  | 22.8  | 34.8  | 40.9  | 43.8  | 68.1  | 68.1  |
| ASTR                    | 5.0   | 37.0  | 62.0  | 38.0  | 19.0  | 9.0   | 2.0   |
| <b>Azerbaijan 2006</b>  |       |       |       |       |       |       |       |
| Using                   | 94.7  | 64.9  | 78.8  | 88.6  | 86.7  | 100.0 | 100.0 |
| Not using               | 20.2  | 29.2  | 49.0  | 56.7  | 72.6  | 84.1  | 84.1  |
| All                     | 22.6  | 33.1  | 55.8  | 67.3  | 77.5  | 89.2  | 89.2  |
| ASTR                    | 10.0  | 84.0  | 142.0 | 124.0 | 86.0  | 33.0  |       |
| <b>Kazakhstan 1999</b>  |       |       |       |       |       |       |       |
| Using                   | 66.9  | 58.1  | 80.9  | 86.1  | 93.2  | 85.2  | 85.2  |
| Not using               | 29.2  | 31.1  | 40.1  | 38.1  | 55.2  | 59.6  | 59.6  |
| All                     | 34.8  | 35.4  | 51.2  | 51.9  | 66.3  | 68.9  | 68.9  |
| ASTR                    | 21.0  | 91.0  | 111.0 | 69.0  | 47.0  | 20.0  |       |
| <b>Kyrgyz Rep. 2012</b> |       |       |       |       |       |       |       |
| Using                   | 17.0  | 48.4  | 51.9  | 52.6  | 48.0  | 81.5  | 81.5  |
| Not using               | 9.5   | 17.8  | 22.4  | 21.7  | 29.8  | 30.0  | 30.0  |
| All                     | 9.8   | 19.2  | 24.5  | 24.3  | 31.4  | 31.9  | 31.9  |
| ASTR                    | 5.0   | 51.0  | 67.0  | 48.0  | 37.0  | 13.0  | 0.0   |
| <b>Moldova 2005</b>     |       |       |       |       |       |       |       |
| Using                   | 56.8  | 59.4  | 72.1  | 72.5  | 71.5  | 90.0  | 90.0  |
| Not using               | 27.6  | 28.9  | 33.3  | 35.6  | 67.2  | 75.4  | 75.4  |
| All                     | 33.3  | 36.2  | 45.2  | 49.0  | 69.0  | 80.6  | 80.6  |
| ASTR                    | 17.0  | 75.0  | 78.0  | 55.0  | 38.0  | 12.0  |       |
| <b>Tajikistan 2012</b>  |       |       |       |       |       |       |       |
| Using                   |       | 26.0  | 52.0  | 67.3  | 65.6  | 70.2  | 70.2  |
| Not using               | 13.0  | 10.6  | 15.0  | 19.5  | 27.9  | 41.1  | 41.1  |
| All                     | 13.0  | 10.7  | 16.0  | 20.8  | 29.4  | 42.7  | 42.7  |
| ASTR                    | 8.0   | 30.0  | 41.0  | 36.0  | 29.0  | 14.0  | 1.0   |
| <b>Tajikistan 2017</b>  |       |       |       |       |       |       |       |
| Using                   |       | 21.7  | 41.0  | 78.4  | 40.3  | 100.0 | 100.0 |
| Not using               | 10.2  | 10.5  | 16.1  | 22.8  | 32.4  | 51.7  | 51.7  |
| All                     | 10.2  | 10.6  | 16.4  | 23.2  | 32.6  | 51.8  | 51.8  |
| ASTR                    | 6.0   | 36.0  | 41.0  | 37.0  | 27.0  | 12.0  | 0.0   |
| <b>Turkey 1998</b>      |       |       |       |       |       |       |       |
| Using                   | 48.0  | 33.9  | 32.7  | 50.0  | 71.3  | 77.5  | 77.5  |
| Not using               | 13.5  | 14.4  | 17.7  | 26.8  | 29.4  | 48.3  | 48.3  |
| All                     | 17.4  | 17.7  | 21.0  | 33.0  | 44.1  | 61.4  | 61.4  |
| ASTR                    | 13.0  | 35.0  | 40.0  | 46.0  | 33.0  | 21.0  | 2.0   |
| <b>Turkey 2003</b>      |       |       |       |       |       |       |       |

|                      | 15-19 | 20-24 | 25-29 | 30-34 | 35-39 | 40-44 | 45-49 |
|----------------------|-------|-------|-------|-------|-------|-------|-------|
| Using                | 18.6  | 21.8  | 29.3  | 50.6  | 57.5  | 52.0  | 52.0  |
| Not using            | 17.8  | 13.3  | 16.9  | 18.4  | 36.7  | 30.3  | 30.3  |
| All                  | 17.9  | 15.0  | 20.3  | 30.1  | 46.0  | 41.0  | 41.0  |
| ASTR                 | 10.0  | 24.0  | 34.0  | 34.0  | 32.0  | 8.0   | 1.0   |
| <b>Ukraine 2007</b>  |       |       |       |       |       |       |       |
| Using                | 52.3  | 41.0  | 75.4  | 71.5  | 77.4  | 85.6  | 85.6  |
| Not using            | 12.9  | 15.6  | 28.5  | 30.0  | 36.5  | 53.8  | 53.8  |
| All                  | 19.4  | 20.5  | 40.6  | 41.6  | 53.2  | 68.2  | 68.2  |
| ASTR                 | 6.0   | 24.0  | 42.0  | 27.0  | 15.0  | 6.0   | 0.0   |
| <b>Latin America</b> |       |       |       |       |       |       |       |
| <b>Bolivia 1994</b>  |       |       |       |       |       |       |       |
| Using                | 14.6  | 8.5   | 14.0  | 17.0  | 13.7  | 19.8  | 19.8  |
| Not using            | 6.6   | 6.1   | 8.1   | 10.1  | 10.5  | 6.4   | 6.4   |
| All                  | 7.7   | 6.5   | 9.2   | 11.8  | 11.1  | 9.4   | 9.4   |
| ASTR                 | 8.0   | 16.0  | 23.0  | 25.0  | 17.0  | 7.0   | 2.0   |
| <b>Bolivia 2008</b>  |       |       |       |       |       |       |       |
| Using                | 8.3   | 15.0  | 15.7  | 16.1  | 18.8  | 24.3  | 24.3  |
| Not using            | 10.3  | 9.8   | 11.2  | 14.4  | 16.8  | 18.0  | 18.0  |
| All                  | 9.9   | 11.0  | 12.3  | 14.9  | 17.4  | 19.4  | 19.4  |
| ASTR                 | 10.0  | 22.0  | 24.0  | 22.0  | 20.0  | 10.0  | 2.0   |
| <b>Brazil 1996</b>   |       |       |       |       |       |       |       |
| Using                | 19.7  | 20.6  | 11.6  | 11.0  | 23.2  | 30.6  | 30.6  |
| Not using            | 11.2  | 10.6  | 12.2  | 11.2  | 21.0  | 31.7  | 31.7  |
| All                  | 12.3  | 12.6  | 12.1  | 11.1  | 21.5  | 31.4  | 31.4  |
| ASTR                 | 12.0  | 22.0  | 17.0  | 10.0  | 13.0  | 7.0   | 1.0   |
| <b>Colombia 1990</b> |       |       |       |       |       |       |       |
| Using                | 20.9  | 15.0  | 14.8  | 24.7  | 12.1  | 26.2  | 26.2  |
| Not using            | 9.9   | 9.3   | 10.8  | 13.4  | 19.0  | 35.1  | 35.1  |
| All                  | 11.1  | 10.2  | 11.7  | 15.9  | 16.9  | 32.4  | 32.4  |
| ASTR                 | 9.0   | 19.0  | 20.0  | 18.0  | 13.0  | 9.0   | 1.0   |
| <b>Colombia 1995</b> |       |       |       |       |       |       |       |
| Using                | 13.3  | 13.8  | 15.0  | 14.4  | 12.0  | 28.1  | 28.1  |
| Not using            | 8.1   | 9.3   | 10.0  | 11.1  | 11.7  | 23.8  | 23.8  |
| All                  | 9.1   | 10.4  | 11.5  | 12.1  | 11.8  | 25.3  | 25.3  |
| ASTR                 | 9.0   | 20.0  | 19.0  | 14.0  | 7.0   | 8.0   | 1.0   |
| <b>Colombia 2000</b> |       |       |       |       |       |       |       |
| Using                | 13.1  | 16.4  | 13.0  | 18.6  | 26.4  | 28.5  | 28.5  |
| Not using            | 10.8  | 13.7  | 15.6  | 16.2  | 24.6  | 27.0  | 27.0  |
| All                  | 11.5  | 14.6  | 14.7  | 17.0  | 25.3  | 27.6  | 27.6  |
| ASTR                 | 11.0  | 24.0  | 22.0  | 20.0  | 17.0  | 6.0   | 1.0   |
| <b>Colombia 2005</b> |       |       |       |       |       |       |       |
| Using                | 17.1  | 22.4  | 17.9  | 22.1  | 33.9  | 24.0  | 24.0  |
| Not using            | 14.7  | 14.7  | 15.8  | 17.3  | 21.0  | 30.4  | 30.4  |
| All                  | 15.3  | 16.8  | 16.4  | 18.8  | 25.1  | 28.2  | 28.2  |
| ASTR                 | 16.0  | 27.0  | 23.0  | 18.0  | 15.0  | 6.0   | 1.0   |
| <b>Colombia 2010</b> |       |       |       |       |       |       |       |
| Using                | 15.4  | 22.6  | 18.1  | 26.5  | 22.1  | 32.9  | 32.9  |



|                            | 15-19 | 20-24 | 25-29 | 30-34 | 35-39 | 40-44 | 45-49 |
|----------------------------|-------|-------|-------|-------|-------|-------|-------|
| Not using                  | 12.8  | 16.4  | 15.8  | 18.3  | 23.8  | 34.6  | 34.6  |
| All                        | 13.4  | 17.7  | 16.3  | 20.1  | 23.4  | 34.2  | 34.2  |
| ASTR                       | 13.0  | 26.0  | 20.0  | 18.0  | 12.0  | 6.0   | 1.0   |
| <b>Colombia 2015</b>       |       |       |       |       |       |       |       |
| Using                      | 17.7  | 16.5  | 23.8  | 20.6  | 19.4  | 16.6  | 16.6  |
| Not using                  | 10.0  | 13.7  | 16.3  | 13.3  | 19.5  | 36.2  | 36.2  |
| All                        | 11.6  | 14.3  | 17.9  | 14.4  | 19.5  | 31.5  | 31.5  |
| ASTR                       | 10.0  | 19.0  | 20.0  | 11.0  | 9.0   | 4.0   | 0.0   |
| <b>Dominican Rep. 1991</b> |       |       |       |       |       |       |       |
| Using                      | 7.1   | 17.9  | 25.5  | 18.4  | 36.5  | 100.0 | 100.0 |
| Not using                  | 10.7  | 9.9   | 15.3  | 20.1  | 17.4  | 24.3  | 24.3  |
| All                        | 10.4  | 10.8  | 16.8  | 19.9  | 20.0  | 30.8  | 30.8  |
| ASTR                       | 10.0  | 25.0  | 35.0  | 29.0  | 14.0  | 5.0   | 5.0   |
| <b>Dominican Rep. 1996</b> |       |       |       |       |       |       |       |
| Using                      | 15.0  | 16.7  | 15.0  | 24.9  | 48.7  | 66.7  | 66.7  |
| Not using                  | 16.7  | 14.2  | 18.5  | 14.1  | 24.9  | 22.5  | 22.5  |
| All                        | 16.6  | 14.6  | 18.0  | 15.7  | 26.7  | 29.0  | 29.0  |
| ASTR                       | 22.0  | 34.0  | 35.0  | 21.0  | 14.0  | 6.0   | 0.0   |
| <b>Dominican Rep. 1999</b> |       |       |       |       |       |       |       |
| Using                      | 13.8  | 10.1  | 35.4  | 3.6   | 0.0   | 29.0  | 29.0  |
| Not using                  | 18.1  | 20.3  | 22.8  | 26.8  | 21.6  | 73.6  | 73.6  |
| All                        | 17.6  | 19.0  | 25.3  | 24.6  | 20.4  | 53.0  | 53.0  |
| ASTR                       | 21.0  | 36.0  | 44.0  | 31.0  | 13.0  | 9.0   | 1.0   |
| <b>Dominican Rep. 2002</b> |       |       |       |       |       |       |       |
| Using                      | 20.1  | 23.3  | 14.9  | 24.7  | 26.5  | 49.2  | 49.2  |
| Not using                  | 13.6  | 14.7  | 14.5  | 18.3  | 16.0  | 43.4  | 43.4  |
| All                        | 14.3  | 16.0  | 14.6  | 19.1  | 17.5  | 44.0  | 44.0  |
| ASTR                       | 19.0  | 36.0  | 25.0  | 23.0  | 9.0   | 6.0   | 1.0   |
| <b>Guatemala 1995</b>      |       |       |       |       |       |       |       |
| Using                      | 0.0   | 19.4  | 2.8   | 13.7  | 5.4   | 16.5  | 16.5  |
| Not using                  | 4.5   | 4.9   | 5.2   | 5.9   | 7.6   | 15.4  | 15.4  |
| All                        | 4.4   | 5.6   | 5.1   | 6.2   | 7.5   | 15.5  | 15.5  |
| ASTR                       | 6.0   | 15.0  | 13.0  | 13.0  | 11.0  | 10.0  | 2.0   |
| <b>Guatemala 1998</b>      |       |       |       |       |       |       |       |
| Using                      | 11.7  | 5.9   | 14.1  | 3.5   | 0.4   | 73.5  | 73.5  |
| Not using                  | 5.7   | 3.7   | 6.1   | 6.4   | 4.5   | 13.3  | 13.3  |
| All                        | 6.0   | 3.8   | 6.9   | 6.2   | 4.2   | 17.2  | 17.2  |
| ASTR                       | 7.0   | 11.0  | 18.0  | 12.0  | 6.0   | 12.0  | 1.0   |
| <b>Guatemala 2014</b>      |       |       |       |       |       |       |       |
| Using                      | 8.9   | 9.9   | 9.0   | 9.9   | 16.3  | 22.2  | 22.2  |
| Not using                  | 7.4   | 5.0   | 7.5   | 8.6   | 9.7   | 21.3  | 21.3  |
| All                        | 7.4   | 5.5   | 7.7   | 8.8   | 10.8  | 21.5  | 21.5  |
| ASTR                       | 7.0   | 10.0  | 12.0  | 11.0  | 8.0   | 7.0   | 1.0   |
| <b>Guyana 2009</b>         |       |       |       |       |       |       |       |
| Using                      | 17.6  | 24.9  | 48.0  | 41.4  | 30.3  | 20.6  | 20.6  |
| Not using                  | 12.5  | 16.5  | 20.6  | 21.5  | 30.9  | 52.4  | 52.4  |
| All                        | 12.7  | 17.7  | 25.2  | 24.9  | 30.9  | 51.1  | 51.1  |

|                       | 15-19 | 20-24 | 25-29 | 30-34 | 35-39 | 40-44 | 45-49 |
|-----------------------|-------|-------|-------|-------|-------|-------|-------|
| ASTR                  | 15.0  | 35.0  | 39.0  | 34.0  | 25.0  | 14.0  | 4.0   |
| <b>Honduras 2005</b>  |       |       |       |       |       |       |       |
| Using                 | 6.8   | 11.8  | 16.3  | 8.3   | 20.0  | 16.9  | 16.9  |
| Not using             | 6.8   | 6.6   | 6.9   | 9.3   | 14.0  | 26.9  | 26.9  |
| All                   | 6.8   | 7.4   | 8.5   | 9.1   | 15.1  | 25.2  | 25.2  |
| ASTR                  | 7.0   | 13.0  | 14.0  | 12.0  | 13.0  | 11.0  | 2.0   |
| <b>Honduras 2011</b>  |       |       |       |       |       |       |       |
| Using                 | 13.4  | 11.6  | 12.7  | 13.3  | 18.5  | 45.7  | 45.7  |
| Not using             | 8.0   | 7.3   | 8.7   | 10.6  | 14.0  | 27.3  | 27.3  |
| All                   | 8.5   | 7.7   | 9.1   | 10.9  | 14.6  | 29.8  | 29.8  |
| ASTR                  | 9.0   | 13.0  | 14.0  | 12.0  | 11.0  | 8.0   | 1.0   |
| <b>Nicaragua 1998</b> |       |       |       |       |       |       |       |
| Using                 | 12.9  | 15.3  | 13.4  | 5.2   | 7.2   | 17.0  | 17.0  |
| Not using             | 4.7   | 8.3   | 8.3   | 7.2   | 11.7  | 9.1   | 9.1   |
| All                   | 5.4   | 9.0   | 8.9   | 7.1   | 11.4  | 9.4   | 9.4   |
| ASTR                  | 7.0   | 19.0  | 16.0  | 9.0   | 10.0  | 3.0   | 1.0   |
| <b>Peru 1991</b>      |       |       |       |       |       |       |       |
| Using                 | 8.4   | 7.4   | 12.7  | 13.8  | 21.8  | 26.2  | 26.2  |
| Not using             | 5.7   | 6.9   | 8.8   | 11.8  | 13.6  | 14.3  | 14.3  |
| All                   | 6.3   | 7.0   | 10.0  | 12.5  | 16.3  | 18.6  | 18.6  |
| ASTR                  | 4.0   | 13.0  | 20.0  | 21.0  | 19.0  | 10.0  | 3.0   |
| <b>Peru 1996</b>      |       |       |       |       |       |       |       |
| Using                 | 14.1  | 8.6   | 11.9  | 15.2  | 11.9  | 18.4  | 18.4  |
| Not using             | 6.4   | 7.4   | 7.9   | 11.3  | 12.9  | 18.9  | 18.9  |
| All                   | 8.1   | 7.7   | 9.1   | 12.6  | 12.6  | 18.7  | 18.7  |
| ASTR                  | 7.0   | 15.0  | 16.0  | 20.0  | 14.0  | 10.0  | 2.0   |
| <b>Peru 2000</b>      |       |       |       |       |       |       |       |
| Using                 | 13.6  | 7.3   | 15.1  | 14.3  | 19.3  | 21.8  | 21.8  |
| Not using             | 8.8   | 6.6   | 7.9   | 11.4  | 12.4  | 15.0  | 15.0  |
| All                   | 9.6   | 6.7   | 9.7   | 12.2  | 14.5  | 17.1  | 17.1  |
| ASTR                  | 7.0   | 10.0  | 14.0  | 16.0  | 13.0  | 7.0   | 1.0   |
| <b>Peru 2004</b>      |       |       |       |       |       |       |       |
| Using                 | 16.9  | 14.5  | 13.2  | 11.2  | 16.7  | 24.7  | 24.7  |
| Not using             | 8.8   | 7.2   | 10.1  | 9.2   | 12.0  | 26.3  | 26.3  |
| All                   | 10.6  | 9.2   | 11.0  | 9.8   | 13.4  | 25.8  | 25.8  |
| ASTR                  | 7.0   | 13.0  | 15.0  | 12.0  | 11.0  | 9.0   | 2.0   |
| <b>Peru 2007</b>      |       |       |       |       |       |       |       |
| Using                 | 17.7  | 14.3  | 18.5  | 18.1  | 18.9  | 23.2  | 23.2  |
| Not using             | 11.5  | 10.0  | 10.4  | 11.4  | 15.5  | 31.3  | 31.3  |
| All                   | 13.3  | 11.3  | 12.9  | 13.4  | 16.7  | 28.8  | 28.8  |
| ASTR                  | 10.0  | 16.0  | 18.0  | 15.0  | 13.0  | 11.0  | 2.0   |
| <b>Peru 2009</b>      |       |       |       |       |       |       |       |
| Using                 | 18.7  | 18.7  | 15.2  | 18.2  | 20.6  | 14.2  | 14.2  |
| Not using             | 7.7   | 11.3  | 10.5  | 12.0  | 16.9  | 29.1  | 29.1  |
| All                   | 11.4  | 13.8  | 11.9  | 13.9  | 17.9  | 24.0  | 24.0  |
| ASTR                  | 9.0   | 19.0  | 17.0  | 18.0  | 15.0  | 9.0   | 1.0   |
| <b>Peru 2010</b>      |       |       |       |       |       |       |       |

|                                 | 15-19 | 20-24 | 25-29 | 30-34 | 35-39 | 40-44 | 45-49 |
|---------------------------------|-------|-------|-------|-------|-------|-------|-------|
| Using                           | 16.3  | 16.9  | 22.9  | 22.4  | 27.2  | 31.5  | 31.5  |
| Not using                       | 10.2  | 11.2  | 11.5  | 13.6  | 17.6  | 28.1  | 28.1  |
| All                             | 12.2  | 13.0  | 14.7  | 16.4  | 20.7  | 29.1  | 29.1  |
| ASTR                            | 9.0   | 18.0  | 21.0  | 19.0  | 17.0  | 12.0  | 1.0   |
| <b>Peru 2011</b>                |       |       |       |       |       |       |       |
| Using                           | 15.0  | 17.9  | 20.2  | 20.2  | 23.2  | 36.0  | 36.0  |
| Not using                       | 12.3  | 11.1  | 10.2  | 13.1  | 13.9  | 29.4  | 29.4  |
| All                             | 13.2  | 13.3  | 13.2  | 15.2  | 17.0  | 31.7  | 31.7  |
| ASTR                            | 9.0   | 19.0  | 19.0  | 19.0  | 15.0  | 12.0  | 1.0   |
| <b>Paraguay 1990</b>            |       |       |       |       |       |       |       |
| Using                           | 14.5  | 21.3  | 17.9  | 18.8  | 20.9  | 33.7  | 33.7  |
| Not using                       | 7.8   | 6.0   | 10.0  | 9.2   | 13.9  | 15.8  | 15.8  |
| All                             | 8.4   | 8.3   | 11.3  | 10.8  | 15.1  | 18.2  | 18.2  |
| ASTR                            | 9.0   | 19.0  | 27.0  | 24.0  | 25.0  | 16.0  | 3.0   |
| <b>South and Southeast Asia</b> |       |       |       |       |       |       |       |
| <b>India 2005</b>               |       |       |       |       |       |       |       |
| Using                           | 13.4  | 20.5  | 28.2  | 43.6  | 37.0  | 48.4  | 48.4  |
| Not using                       | 12.2  | 10.0  | 11.2  | 15.0  | 17.3  | 9.9   | 9.9   |
| All                             | 12.2  | 10.4  | 12.0  | 17.0  | 19.3  | 13.6  | 13.6  |
| ASTR                            | 13.0  | 24.0  | 19.0  | 13.0  | 6.0   | 1.0   | 0.0   |
| <b>Indonesia 2012</b>           |       |       |       |       |       |       |       |
| Using                           | 29.0  | 5.6   | 3.3   | 12.4  | 19.9  | 17.5  | 17.5  |
| Not using                       | 9.1   | 7.9   | 9.0   | 11.7  | 15.5  | 21.2  | 21.2  |
| All                             | 9.4   | 7.8   | 8.7   | 11.7  | 16.1  | 20.7  | 20.7  |
| ASTR                            | 5.0   | 12.0  | 14.0  | 14.0  | 12.0  | 5.0   | 1.0   |
| <b>Cambodia 2010</b>            |       |       |       |       |       |       |       |
| Using                           | 26.9  | 31.7  | 37.9  | 60.2  | 57.9  | 74.6  | 74.6  |
| Not using                       | 16.7  | 14.2  | 16.7  | 21.6  | 32.5  | 44.2  | 44.2  |
| All                             | 16.9  | 14.5  | 18.3  | 25.2  | 35.2  | 47.9  | 47.9  |
| ASTR                            | 9.0   | 29.0  | 37.0  | 41.0  | 39.0  | 26.0  | 4.0   |
| <b>Cambodia 2014</b>            |       |       |       |       |       |       |       |
| Using                           | 74.1  | 35.7  | 44.8  | 52.6  | 75.1  | 83.1  | 83.1  |
| Not using                       | 15.9  | 16.1  | 19.7  | 20.9  | 31.4  | 55.0  | 55.0  |
| All                             | 17.2  | 17.1  | 22.6  | 25.4  | 39.3  | 59.4  | 59.4  |
| ASTR                            | 12.0  | 34.0  | 44.0  | 35.0  | 33.0  | 25.0  | 6.0   |
| <b>Nepal 2011</b>               |       |       |       |       |       |       |       |
| Using                           | 42.2  | 18.5  | 48.5  | 63.5  | 35.6  | 11.1  | 11.1  |
| Not using                       | 11.4  | 10.2  | 16.5  | 16.8  | 22.9  | 23.1  | 23.1  |
| All                             | 11.7  | 10.4  | 18.4  | 20.9  | 24.7  | 21.3  | 21.3  |
| ASTR                            | 11.0  | 22.0  | 28.0  | 19.0  | 12.0  | 4.0   | 1.0   |
| <b>Nepal 2016</b>               |       |       |       |       |       |       |       |
| Using                           | 30.8  | 24.2  | 46.0  | 60.9  | 56.8  | 50.0  | 50.0  |
| Not using                       | 13.3  | 15.3  | 19.0  | 28.5  | 41.7  | 48.0  | 48.0  |
| All                             | 13.8  | 15.6  | 20.5  | 31.3  | 42.9  | 48.5  | 48.5  |
| ASTR                            | 14.0  | 32.0  | 32.0  | 27.0  | 14.0  | 6.0   | 2.0   |
| <b>Philippines 1993</b>         |       |       |       |       |       |       |       |
| Using                           | 13.9  | 7.8   | 12.7  | 10.3  | 12.4  | 27.1  | 27.1  |

|                         | 15-19 | 20-24 | 25-29 | 30-34 | 35-39 | 40-44 | 45-49 |
|-------------------------|-------|-------|-------|-------|-------|-------|-------|
| Not using               | 10.3  | 7.2   | 8.1   | 8.0   | 13.5  | 21.9  | 21.9  |
| All                     | 10.5  | 7.3   | 8.7   | 8.3   | 13.3  | 22.7  | 22.7  |
| ASTR                    | 6.0   | 15.0  | 21.0  | 16.0  | 18.0  | 15.0  | 2.0   |
| <b>Philippines 1998</b> |       |       |       |       |       |       |       |
| Using                   | 11.9  | 9.0   | 5.8   | 15.3  | 13.5  | 32.4  | 32.4  |
| Not using               | 13.0  | 7.6   | 8.2   | 10.1  | 15.7  | 25.1  | 25.1  |
| All                     | 12.9  | 7.8   | 7.7   | 11.3  | 15.2  | 26.5  | 26.5  |
| ASTR                    | 7.0   | 15.0  | 18.0  | 20.0  | 20.0  | 14.0  | 3.0   |
| <b>Philippines 2003</b> |       |       |       |       |       |       |       |
| Using                   | 16.3  | 6.5   | 8.0   | 14.9  | 11.1  | 17.6  | 17.6  |
| Not using               | 9.0   | 8.6   | 8.2   | 9.9   | 13.4  | 26.6  | 26.6  |
| All                     | 9.5   | 8.4   | 8.1   | 10.8  | 13.1  | 25.0  | 25.0  |
| ASTR                    | 6.0   | 16.0  | 17.0  | 17.0  | 14.0  | 14.0  | 2.0   |
| <b>Timor Leste 2009</b> |       |       |       |       |       |       |       |
| Using                   | 0.0   | 0.0   | 0.0   | 14.4  | 13.7  |       |       |
| Not using               | 4.7   | 2.3   | 2.6   | 2.4   | 2.7   | 5.3   | 5.3   |
| All                     | 4.7   | 2.3   | 2.6   | 2.5   | 2.8   | 5.3   | 5.3   |
| ASTR                    | 3.0   | 5.0   | 7.0   | 7.0   | 6.0   | 5.0   | 3.0   |
| <b>Timor Leste 2016</b> |       |       |       |       |       |       |       |
| Using                   |       |       | 0.0   | 0.0   | 0.0   | 0.0   | 0.0   |
| Not using               | 5.4   | 3.5   | 2.9   | 2.6   | 4.8   | 3.6   | 3.6   |
| All                     | 5.4   | 3.5   | 2.8   | 2.6   | 4.7   | 3.6   | 3.6   |
| ASTR                    | 2.0   | 7.0   | 7.0   | 5.0   | 6.0   | 2.0   | 1.0   |

Note: Cells left in blank correspond to categories with less than 10 unweighted pregnancies.
