# Supplementary material for: Reported patterns of pregnancy termination from Demographic and Health Surveys
Source: PubMed Central journal article supplement (PMC6699730; doi:10.1371/journal.pone.0221178), 2019-08-19
Supplement: pone.0221178.s007.pdf [file pone.0221178.s007.pdf]

|                          | In-union |       |       |       |       |       | Not-in-union |       |
|--------------------------|----------|-------|-------|-------|-------|-------|--------------|-------|
|                          | 15-19    | 20-24 | 25-29 | 30-34 | 35-39 | 40-49 | 15-24        | 25-49 |
| <b>Africa</b>            |          |       |       |       |       |       |              |       |
| <b>Angola 2015</b>       |          |       |       |       |       |       |              |       |
| Using                    | 12.4     | 59.1  | 8.7   | 10.8  | 11.8  | 22.3  | 0            | 21.3  |
| Not using                | 6.3      | 5.5   | 5.1   | 5.5   | 7.6   | 15.6  | 7.3          | 7.8   |
| All                      | 6.3      | 6     | 5.1   | 5.5   | 7.6   | 15.6  | 7.2          | 7.8   |
| <b>Burkina Faso 2010</b> |          |       |       |       |       |       |              |       |
| Using                    | 12.4     | 17.2  | 6.2   | 18.5  | 11.8  | 22.3  | 14.6         | 21.3  |
| Not using                | 7        | 4.1   | 3.6   | 4.7   | 4.7   | 9     | 8.5          | 18.5  |
| All                      | 7        | 4.2   | 3.6   | 4.8   | 4.8   | 9     | 8.7          | 18.5  |
| <b>Benin 2011</b>        |          |       |       |       |       |       |              |       |
| Using                    | 12.4     | 9.9   | 0     | 10.8  | 11.8  | 22.3  | 14.6         | 21.3  |
| Not using                | 3.8      | 3.5   | 2.8   | 3.8   | 5.1   | 3.5   | 4.9          | 10.2  |
| All                      | 3.8      | 3.6   | 2.8   | 3.8   | 5.1   | 3.6   | 4.9          | 10.3  |
| <b>Burundi 2010</b>      |          |       |       |       |       |       |              |       |
| Using                    | 12.4     | 13.5  | 0     | 2.8   | 0     | 42.2  | 14.6         | 21.3  |
| Not using                | 11.4     | 5.9   | 4.4   | 7     | 8.9   | 18.2  | 8.7          | 1.8   |
| All                      | 11.4     | 6     | 4.3   | 6.9   | 8.7   | 19    | 8.8          | 1.8   |
| <b>Burundi 2016</b>      |          |       |       |       |       |       |              |       |
| Using                    | 12.4     | 5.1   | 0     | 6.4   | 13    | 22.3  | 14.6         | 21.3  |
| Not using                | 10.3     | 7.7   | 6.6   | 6.7   | 10.9  | 16.9  | 5.7          | 4.9   |
| All                      | 10.3     | 7.7   | 6.5   | 6.7   | 10.9  | 17    | 5.7          | 4.9   |
| <b>Ethiopia 2005</b>     |          |       |       |       |       |       |              |       |
| Using                    | 0        | 27.4  | 14.5  | 17.5  | 21.9  | 22.3  | 14.6         | 21.3  |
| Not using                | 3        | 4.2   | 3.3   | 4.2   | 5     | 9.1   | 10.8         | 0     |
| All                      | 3        | 4.5   | 3.4   | 4.2   | 5.3   | 9.2   | 10.9         | 1.1   |
| <b>Ethiopia 2011</b>     |          |       |       |       |       |       |              |       |
| Using                    | 1.6      | 6.1   | 6.2   | 9.3   | 3.8   | 22.3  | 13.8         | 21.3  |
| Not using                | 6.1      | 6.6   | 3.3   | 5.5   | 8.9   | 15.9  | 8.4          | 3.3   |
| All                      | 6        | 6.5   | 3.5   | 5.7   | 8.6   | 16    | 8.7          | 3.8   |
| <b>Ethiopia 2016</b>     |          |       |       |       |       |       |              |       |
| Using                    | 12.4     | 0     | 19.1  | 12.5  | 4.1   | 22.3  | 14.6         | 21.3  |
| Not using                | 4.5      | 3.5   | 4.4   | 5.2   | 6.7   | 14.8  | 9.9          | 12.3  |
| All                      | 4.5      | 3.5   | 4.6   | 5.3   | 6.7   | 14.8  | 10           | 12.5  |
| <b>Ghana 2008</b>        |          |       |       |       |       |       |              |       |
| Using                    | 13.9     | 10    | 17.7  | 4.6   | 19    | 30    | 39.2         | 30.1  |
| Not using                | 9.4      | 10.7  | 8.5   | 14.5  | 13.2  | 20.7  | 26.8         | 34    |
| All                      | 9.7      | 10.6  | 9.3   | 13.9  | 13.8  | 21.2  | 28.1         | 33.4  |
| <b>Ghana 2014</b>        |          |       |       |       |       |       |              |       |
| Using                    | 13.9     | 25.3  | 23.4  | 15.8  | 22.8  | 30    | 52.5         | 80.4  |
| Not using                | 11.4     | 13.7  | 11.7  | 14.8  | 17.3  | 22.6  | 32.4         | 39.6  |
| All                      | 11.5     | 14.1  | 12.1  | 14.9  | 17.5  | 22.8  | 33.7         | 42.7  |
| <b>Kenya 1998</b>        |          |       |       |       |       |       |              |       |
| Using                    | 5.4      | 1.3   | 5.3   | 3     | 12.5  | 0     | 5            | 24.2  |
| Not using                | 4.5      | 5.1   | 5.4   | 5.4   | 5.5   | 9.6   | 6.6          | 8.3   |
| All                      | 4.5      | 4.8   | 5.4   | 5.1   | 5.9   | 8.6   | 6.4          | 9.7   |

|                        | In-union    |            |            |             |             |             | Not-in-union |             |
|------------------------|-------------|------------|------------|-------------|-------------|-------------|--------------|-------------|
|                        | 15-19       | 20-24      | 25-29      | 30-34       | 35-39       | 40-49       | 15-24        | 25-49       |
| <b>Kenya 2003</b>      |             |            |            |             |             |             |              |             |
| Using                  | 17.9        | 6.9        | 1.3        | 5.3         | 11.1        | <i>22.3</i> | 7            | 7.4         |
| Not using              | 7.6         | 5.4        | 3.9        | 5.3         | 8.2         | 8.2         | 4.3          | 6.1         |
| All                    | 8.1         | 5.5        | 3.7        | 5.3         | 8.6         | 9.2         | 4.5          | 6.2         |
| <b>Kenya 2008</b>      |             |            |            |             |             |             |              |             |
| Using                  | 6           | 8          | 5.5        | 4.1         | 4.3         | 15.7        | 0            | 5.1         |
| Not using              | 3.3         | 4.4        | 6.5        | 4.4         | 12.5        | 19          | 3.1          | 9           |
| All                    | 3.4         | 4.8        | 6.3        | 4.4         | 11.4        | 18.6        | 2.9          | 8.3         |
| <b>Comoros 2012</b>    |             |            |            |             |             |             |              |             |
| Using                  | <i>12.4</i> | <i>9.9</i> | <i>8.7</i> | <i>10.8</i> | <i>11.8</i> | <i>22.3</i> | <i>14.6</i>  | <i>21.3</i> |
| Not using              | 5.7         | 4.6        | 8.1        | 5.8         | 12          | 18.1        | 6.6          | 17.9        |
| All                    | 5.7         | 4.7        | 8.1        | 5.9         | 12          | 18.2        | 6.6          | 17.9        |
| <b>Liberia 2013</b>    |             |            |            |             |             |             |              |             |
| Using                  | <i>13.9</i> | 29.3       | 39.4       | <i>23.2</i> | 36.4        | <i>30</i>   | 38.7         | <i>30.1</i> |
| Not using              | 7.7         | 8.3        | 12.4       | 11.9        | 11.7        | 27          | 11.7         | 10.9        |
| All                    | 7.8         | 8.6        | 13.1       | 12          | 12.5        | 27          | 12.4         | 10.9        |
| <b>Lesotho 2009</b>    |             |            |            |             |             |             |              |             |
| Using                  | 7.7         | 2.7        | 2.9        | 6.6         | 11.1        | <i>22.3</i> | 15.3         | <i>21.3</i> |
| Not using              | 4.3         | 6          | 4.6        | 5.1         | 9.3         | 4.1         | 3.7          | 7.7         |
| All                    | 4.5         | 5.7        | 4.4        | 5.3         | 9.6         | 5.3         | 4.5          | 8.6         |
| <b>Lesotho 2014</b>    |             |            |            |             |             |             |              |             |
| Using                  | 22.4        | 1.2        | 1.9        | 11.7        | 6.8         | <i>22.3</i> | 5            | 6.9         |
| Not using              | 9.8         | 4.8        | 10.1       | 10.1        | 12.4        | 13.1        | 7.1          | 10.5        |
| All                    | 10.7        | 4.4        | 9.2        | 10.3        | 11.4        | 14.3        | 6.9          | 10          |
| <b>Morocco 1992</b>    |             |            |            |             |             |             |              |             |
| Using                  | <i>12.4</i> | 4.6        | 9.2        | 9.4         | 13.6        | 25.5        | <i>14.6</i>  | <i>21.3</i> |
| Not using              | 9.1         | 7.1        | 7.7        | 8.6         | 8.9         | 8.5         | <i>7.5</i>   | <i>9.2</i>  |
| All                    | 9.2         | 6.9        | 7.8        | 8.8         | 9.7         | 11.8        | 7.5          | 14.4        |
| <b>Morocco 2003</b>    |             |            |            |             |             |             |              |             |
| Using                  | 18.1        | 11.1       | 10.2       | 12.3        | 15.8        | 21.8        | <i>14.6</i>  | <i>21.3</i> |
| Not using              | 10          | 8.5        | 8.2        | 11.7        | 16.9        | 29.8        | 8.6          | <i>9.2</i>  |
| All                    | 10.7        | 8.9        | 8.6        | 11.9        | 16.6        | 27.2        | 8.9          | 9.2         |
| <b>Madagascar 2008</b> |             |            |            |             |             |             |              |             |
| Using                  | 11          | 8.3        | 14.3       | 12          | 11          | 21.1        | 31.8         | <i>21.3</i> |
| Not using              | 5.2         | 5.7        | 6.4        | 6.8         | 7.6         | 11.4        | 11.6         | 9.2         |
| All                    | 5.4         | 5.9        | 7          | 7.2         | 7.8         | 11.8        | 12.5         | 10.5        |
| <b>Mali 2012</b>       |             |            |            |             |             |             |              |             |
| Using                  | <i>12.4</i> | <i>9.9</i> | <i>8.7</i> | <i>10.8</i> | <i>11.8</i> | <i>22.3</i> | <i>14.6</i>  | <i>21.3</i> |
| Not using              | 4.5         | 3.5        | 3.8        | 3.4         | 4.6         | 7.2         | 5.7          | 2.4         |
| All                    | 4.5         | 3.5        | 3.8        | 3.4         | 4.6         | 7.2         | 5.7          | 2.4         |
| <b>Malawi 2004</b>     |             |            |            |             |             |             |              |             |
| Using                  | 12.5        | 0.6        | 0          | 7.5         | 6           | 5.1         | <i>14.6</i>  | <i>21.3</i> |
| Not using              | 5.8         | 4.4        | 4.3        | 5           | 7           | 6.4         | 5            | 5.5         |
| All                    | 5.9         | 4.2        | 4.1        | 5.1         | 7           | 6.3         | 5            | 5.6         |
| <b>Malawi 2010</b>     |             |            |            |             |             |             |              |             |

|                          | In-union    |            |       |             |             |             | Not-in-union |             |
|--------------------------|-------------|------------|-------|-------------|-------------|-------------|--------------|-------------|
|                          | 15-19       | 20-24      | 25-29 | 30-34       | 35-39       | 40-49       | 15-24        | 25-49       |
| Using                    | 6.7         | 2.4        | 2.5   | 5.9         | 5.5         | 4.5         | 1.3          | <i>21.3</i> |
| Not using                | 6.8         | 3.7        | 5.1   | 5.4         | 5.3         | 13.2        | 7.9          | 16.8        |
| All                      | 6.8         | 3.6        | 4.9   | 5.5         | 5.3         | 12.7        | 7.7          | 17.3        |
| <b>Malawi 2015</b>       |             |            |       |             |             |             |              |             |
| Using                    | 9.4         | 2.6        | 8.2   | 10          | 3.3         | <i>22.3</i> | <i>14.6</i>  | <i>21.3</i> |
| Not using                | 6.2         | 4.9        | 5.3   | 4.3         | 5.8         | 10.2        | 7.6          | 6.3         |
| All                      | 6.3         | 4.8        | 5.4   | 4.5         | 5.7         | 10.3        | 7.6          | 6.5         |
| <b>Mozambique 2011</b>   |             |            |       |             |             |             |              |             |
| Using                    | <i>12.4</i> | 34.4       | 3.8   | <i>10.8</i> | <i>11.8</i> | <i>22.3</i> | 33.2         | <i>21.3</i> |
| Not using                | 7.7         | 4.2        | 5.5   | 4.4         | 5.8         | 8.7         | 10.7         | 10.8        |
| All                      | 7.7         | 4.4        | 5.5   | 4.4         | 5.8         | 8.8         | 11.1         | 10.8        |
| <b>Nigeria 2008</b>      |             |            |       |             |             |             |              |             |
| Using                    | 15.7        | 6.1        | 3.9   | 8           | 15.2        | 10          | 48.5         | 31.4        |
| Not using                | 5.2         | 5.2        | 4.7   | 6.2         | 10          | 11.3        | 16.2         | 13.4        |
| All                      | 5.4         | 5.3        | 4.7   | 6.4         | 10.3        | 11.2        | 19           | 15.4        |
| <b>Nigeria 2013</b>      |             |            |       |             |             |             |              |             |
| Using                    | 18.6        | 16.8       | 7.5   | 7.4         | 26.7        | 20.8        | 43.7         | 66.8        |
| Not using                | 6.3         | 5.4        | 6.1   | 7.2         | 9.3         | 13.1        | 13.7         | 17          |
| All                      | 6.3         | 5.6        | 6.1   | 7.2         | 9.9         | 13.3        | 15.2         | 19.3        |
| <b>Niger 2012</b>        |             |            |       |             |             |             |              |             |
| Using                    | <i>12.4</i> | <i>9.9</i> | 8.5   | <i>10.8</i> | <i>11.8</i> | <i>22.3</i> | <i>14.6</i>  | <i>21.3</i> |
| Not using                | 9.1         | 3.8        | 5.8   | 7.9         | 9.5         | 17.3        | 6.8          | 0           |
| All                      | 9.1         | 3.9        | 5.9   | 7.9         | 9.5         | 17.3        | 6.8          | 0           |
| <b>Namibia 2006</b>      |             |            |       |             |             |             |              |             |
| Using                    | <i>12.4</i> | 3.7        | 6     | 6.6         | 3           | <i>22.3</i> | 1.6          | 4.7         |
| Not using                | 1.5         | 6          | 4.9   | 7.6         | 9           | 16.4        | 3.3          | 4           |
| All                      | 1.6         | 5.8        | 5     | 7.5         | 8.5         | 16.6        | 3.1          | 4.1         |
| <b>Namibia 2013</b>      |             |            |       |             |             |             |              |             |
| Using                    | <i>12.4</i> | 4.8        | 10.1  | 3.9         | 10.6        | <i>22.3</i> | 2.4          | 5           |
| Not using                | 2.5         | 5.5        | 11.5  | 6           | 7.9         | 14.4        | 4.8          | 8.5         |
| All                      | 2.8         | 5.5        | 11.4  | 5.8         | 8.1         | 15          | 4.4          | 8.2         |
| <b>Rwanda 2010</b>       |             |            |       |             |             |             |              |             |
| Using                    | <i>12.4</i> | 4          | 3.2   | 11.8        | 12.7        | 17.7        | <i>14.6</i>  | <i>21.3</i> |
| Not using                | 5.1         | 7.6        | 5.1   | 5.3         | 8.3         | 18.1        | 5.6          | 7.1         |
| All                      | 5.1         | 7.5        | 5     | 5.7         | 8.6         | 18          | 5.6          | 7.2         |
| <b>Rwanda 2014</b>       |             |            |       |             |             |             |              |             |
| Using                    | <i>12.4</i> | 4          | 8.8   | 10.5        | 17.5        | 17.6        | <i>14.6</i>  | <i>21.3</i> |
| Not using                | 10.5        | 7.2        | 5.9   | 7.7         | 10          | 16.2        | 5.6          | 6.8         |
| All                      | 10.6        | 7.1        | 6.1   | 8           | 11          | 16.4        | 5.7          | 7.2         |
| <b>Sierra Leone 2008</b> |             |            |       |             |             |             |              |             |
| Using                    | <i>12.4</i> | 7.7        | 9.1   | 0           | 0           | <i>22.3</i> | 18.9         | <i>21.3</i> |
| Not using                | 5.4         | 5.1        | 6.2   | 6           | 6.4         | 10.1        | 8.5          | 6.2         |
| All                      | 5.4         | 5.2        | 6.3   | 5.8         | 6.3         | 10.3        | 8.8          | 7.1         |
| <b>Sierra Leone 2013</b> |             |            |       |             |             |             |              |             |
| Using                    | <i>12.4</i> | 3.5        | 16    | 57.7        | 11.2        | <i>22.3</i> | 12.5         | <i>21.3</i> |

|                      | In-union    |            |            |             |             |             | Not-in-union |             |
|----------------------|-------------|------------|------------|-------------|-------------|-------------|--------------|-------------|
|                      | 15-19       | 20-24      | 25-29      | 30-34       | 35-39       | 40-49       | 15-24        | 25-49       |
| Not using            | 6.2         | 5.4        | 5.9        | 5.7         | 7.9         | 10.6        | 7.9          | 11.5        |
| All                  | 6.2         | 5.4        | 6          | 6.1         | 8           | 10.8        | 8            | 11.8        |
| <b>Senegal 2012</b>  |             |            |            |             |             |             |              |             |
| Using                | <i>12.4</i> | <i>9.9</i> | <i>8.7</i> | 11.4        | <i>11.8</i> | <i>22.3</i> | <i>14.6</i>  | <i>21.3</i> |
| Not using            | 11.2        | 8.7        | 8.4        | 7.4         | 10.4        | 17.2        | 8.3          | 1.1         |
| All                  | 11.2        | 8.7        | 8.4        | 7.5         | 10.4        | 17.3        | 8.5          | 1.1         |
| <b>Senegal 2014</b>  |             |            |            |             |             |             |              |             |
| Using                | <i>12.4</i> | <i>9.9</i> | 19.2       | <i>10.8</i> | <i>11.8</i> | <i>22.3</i> | <i>14.6</i>  | <i>21.3</i> |
| Not using            | 6.5         | 7.7        | 6.7        | 11.1        | 10.5        | 10.1        | 7.6          | 4           |
| All                  | 6.5         | 7.8        | 6.8        | 11.1        | 10.5        | 10.2        | 7.6          | 4           |
| <b>Senegal 2015</b>  |             |            |            |             |             |             |              |             |
| Using                | <i>12.4</i> | <i>9.9</i> | <i>8.7</i> | 0           | <i>11.8</i> | <i>22.3</i> | <i>14.6</i>  | <i>21.3</i> |
| Not using            | 9.2         | 6.5        | 6          | 9.4         | 15.6        | 20.8        | 5            | 8.2         |
| All                  | 9.2         | 6.5        | 6.1        | 9.2         | 15.5        | 20.8        | 5            | 8.2         |
| <b>Senegal 2016</b>  |             |            |            |             |             |             |              |             |
| Using                | <i>12.4</i> | <i>9.9</i> | 0          | 16.6        | 6.6         | <i>22.3</i> | <i>14.6</i>  | <i>21.3</i> |
| Not using            | 5.4         | 8.1        | 5.7        | 10.7        | 14.1        | 17.5        | 11           | 18.7        |
| All                  | 5.4         | 8.1        | 5.6        | 10.9        | 13.7        | 17.6        | 11           | 18.7        |
| <b>Senegal 2017</b>  |             |            |            |             |             |             |              |             |
| Using                | <i>12.4</i> | <i>9.9</i> | <i>8.7</i> | 4.9         | 10.7        | <i>22.3</i> | <i>14.6</i>  | <i>21.3</i> |
| Not using            | 10.4        | 8.4        | 8          | 9.5         | 15.7        | 21.1        | 6.1          | 14          |
| All                  | 10.4        | 8.5        | 8          | 9.5         | 15.6        | 21.1        | 6.1          | 14.2        |
| <b>Tanzania 2004</b> |             |            |            |             |             |             |              |             |
| Using                | <i>12.4</i> | 8.7        | 18.7       | 10.9        | 2.5         | <i>22.3</i> | 14.5         | <i>21.3</i> |
| Not using            | 8.8         | 5.7        | 6.1        | 8.5         | 11.2        | 22.3        | 10.1         | 16.2        |
| All                  | 8.8         | 5.9        | 6.9        | 8.6         | 10.8        | 22.3        | 10.2         | 16.3        |
| <b>Tanzania 2010</b> |             |            |            |             |             |             |              |             |
| Using                | <i>12.4</i> | 2.5        | 3.3        | 6           | 7.7         | 4.4         | 3.9          | <i>21.3</i> |
| Not using            | 8.5         | 7.2        | 7.1        | 7.3         | 13          | 17.2        | 7.3          | 0.8         |
| All                  | 8.5         | 7          | 6.9        | 7.2         | 12.7        | 16          | 7.2          | 2.2         |
| <b>Tanzania 2015</b> |             |            |            |             |             |             |              |             |
| Using                | 5.5         | 6.3        | 15.1       | 11.5        | 9.6         | 15.5        | 19.5         | <i>21.3</i> |
| Not using            | 9           | 7.7        | 8.6        | 8.7         | 12.3        | 20.1        | 9.3          | 14.4        |
| All                  | 8.9         | 7.6        | 9          | 8.9         | 12.1        | 19.7        | 9.8          | 15          |
| <b>Uganda 2006</b>   |             |            |            |             |             |             |              |             |
| Using                | 25.1        | 9.7        | 8.7        | 7.9         | 25.1        | <i>22.3</i> | 1.6          | <i>21.3</i> |
| Not using            | 9.4         | 7.3        | 6.4        | 9.2         | 13.9        | 23.5        | 13           | 13.7        |
| All                  | 10          | 7.4        | 6.6        | 9.1         | 14.6        | 23.4        | 12.2         | 14          |
| <b>Uganda 2011</b>   |             |            |            |             |             |             |              |             |
| Using                | 0           | 12.6       | 4.1        | 4.4         | 18.2        | <i>22.3</i> | 8            | <i>21.3</i> |
| Not using            | 12.9        | 6.6        | 8          | 8.6         | 12.5        | 25.5        | 13.3         | 17.3        |
| All                  | 12.5        | 6.9        | 7.8        | 8.3         | 12.7        | 25.3        | 13.1         | 17.5        |
| <b>Uganda 2016</b>   |             |            |            |             |             |             |              |             |
| Using                | 7           | 15.9       | 14.1       | 17.9        | 27.4        | 17.7        | 35.2         | <i>30.1</i> |
| Not using            | 10.3        | 9.1        | 7.9        | 10.5        | 15          | 25.5        | 10.5         | 18.3        |

|                                           | In-union    |       |       |       |             |             | Not-in-union |             |
|-------------------------------------------|-------------|-------|-------|-------|-------------|-------------|--------------|-------------|
|                                           | 15-19       | 20-24 | 25-29 | 30-34 | 35-39       | 40-49       | 15-24        | 25-49       |
| All                                       | 10.3        | 9.4   | 8.2   | 10.8  | 15.7        | 25          | 10.9         | 18.9        |
| <b>Zambia 2007</b>                        |             |       |       |       |             |             |              |             |
| Using                                     | 6.1         | 5.2   | 5     | 11    | 2.3         | 0           | 15.6         | <i>21.3</i> |
| Not using                                 | 7.7         | 5.2   | 6.2   | 5.4   | 6           | 10.8        | 5.7          | 12.4        |
| All                                       | 7.6         | 5.2   | 6.1   | 6.1   | 5.5         | 9.7         | 6.4          | 13.2        |
| <b>Zambia 2013</b>                        |             |       |       |       |             |             |              |             |
| Using                                     | 4           | 2.4   | 3.5   | 2.6   | 14.6        | 3           | 2.8          | <i>21.3</i> |
| Not using                                 | 5.6         | 5.5   | 4.2   | 5.3   | 6.4         | 13.9        | 5.2          | 11.4        |
| All                                       | 5.6         | 5.3   | 4.1   | 5.1   | 7.2         | 12.7        | 5.2          | 11.7        |
| <b>Zimbabwe 1994</b>                      |             |       |       |       |             |             |              |             |
| Using                                     | 6           | 5.5   | 7.2   | 9.8   | 14.2        | 27.3        | 5.3          | 24.9        |
| Not using                                 | 10.4        | 8.4   | 4.9   | 6     | 7           | 24.5        | 6.6          | 12.5        |
| All                                       | 10          | 8.1   | 5.2   | 6.4   | 8.3         | 24.9        | 6.5          | 13.6        |
| <b>Zimbabwe 1999</b>                      |             |       |       |       |             |             |              |             |
| Using                                     | 13.2        | 16.5  | 5.5   | 0     | 4.2         | <i>22.3</i> | 10           | <i>21.3</i> |
| Not using                                 | 8.5         | 7     | 6.5   | 7.1   | 11.6        | 18.9        | 8.2          | 8.2         |
| All                                       | 8.8         | 7.9   | 6.4   | 6.2   | 10.7        | 19.1        | 8.3          | 9.4         |
| <b>Zimbabwe 2005</b>                      |             |       |       |       |             |             |              |             |
| Using                                     | 30.4        | 2.3   | 5.2   | 2.7   | 6.9         | 23.9        | 5.5          | 0           |
| Not using                                 | 9.4         | 5.9   | 7.1   | 4.6   | 12.1        | 18.2        | 5.8          | 10.9        |
| All                                       | 10.6        | 5.5   | 6.8   | 4.4   | 11.6        | 18.8        | 5.8          | 10          |
| <b>Zimbabwe 2010</b>                      |             |       |       |       |             |             |              |             |
| Using                                     | <i>12.4</i> | 5     | 3.3   | 11.3  | 5.9         | 0           | 21.8         | <i>21.3</i> |
| Not using                                 | 9.7         | 5     | 7.3   | 8     | 8.1         | 7.7         | 5.4          | 12.4        |
| All                                       | 9.8         | 5     | 7     | 8.4   | 7.8         | 6.8         | 5.7          | 12.7        |
| <b>Zimbabwe 2015</b>                      |             |       |       |       |             |             |              |             |
| Using                                     | 0           | 4     | 8.5   | 9.7   | 11.8        | 10          | <i>14.6</i>  | <i>21.3</i> |
| Not using                                 | 9.4         | 9.2   | 5     | 7.1   | 11.1        | 26.6        | 9.7          | 6           |
| All                                       | 9           | 8.7   | 5.4   | 7.4   | 11.1        | 24.7        | 9.8          | 6.3         |
| <b>Central and West Asia &amp; Europe</b> |             |       |       |       |             |             |              |             |
| <b>Albania 2008</b>                       |             |       |       |       |             |             |              |             |
| Using                                     | <i>13.9</i> | 24.1  | 14.9  | 20.2  | 23.9        | <i>30</i>   | <i>26.5</i>  | <i>30.1</i> |
| Not using                                 | 12          | 6.9   | 11    | 22.4  | 38.8        | 71.3        | 9.1          | 0           |
| All                                       | 12.1        | 10.2  | 12    | 21.8  | 36.1        | 71.3        | 11.8         | 4.2         |
| <b>Albania 2017</b>                       |             |       |       |       |             |             |              |             |
| Using                                     | <i>12.4</i> | 20    | 16.3  | 24.9  | <i>11.8</i> | <i>22.3</i> | <i>14.6</i>  | <i>21.3</i> |
| Not using                                 | 6.7         | 6.9   | 7.6   | 7.6   | 19.6        | 38.9        | 5.5          | 0           |
| All                                       | 6.8         | 7.6   | 8     | 8.5   | 19.3        | 37.7        | 5.6          | 0           |
| <b>Armenia 2000</b>                       |             |       |       |       |             |             |              |             |
| Using                                     | 53.4        | 75.7  | 86    | 88.6  | 93.7        | 97.1        | <i>49.4</i>  | <i>66.1</i> |
| Not using                                 | 18.5        | 30.6  | 50.1  | 73.1  | 74.6        | 86.7        | <i>36.7</i>  | <i>46.5</i> |
| All                                       | 22.6        | 45.3  | 68.7  | 81.4  | 85.3        | 91.9        | 36.7         | 46.5        |
| <b>Armenia 2005</b>                       |             |       |       |       |             |             |              |             |
| Using                                     | <i>61.9</i> | 64.3  | 86    | 96.3  | 89.3        | 74.3        | <i>49.4</i>  | <i>66.1</i> |
| Not using                                 | 19          | 24.3  | 45.3  | 59.5  | 72.6        | 91.5        | <i>36.7</i>  | 25.5        |

|                         | In-union    |       |       |             |             |             | Not-in-union |             |
|-------------------------|-------------|-------|-------|-------------|-------------|-------------|--------------|-------------|
|                         | 15-19       | 20-24 | 25-29 | 30-34       | 35-39       | 40-49       | 15-24        | 25-49       |
| All                     | 20.7        | 31.9  | 58.8  | 74          | 80.2        | 84.5        | 46.5         | 28.2        |
| <b>Armenia 2010</b>     |             |       |       |             |             |             |              |             |
| Using                   | <i>33.7</i> | 49.1  | 69.2  | 72.7        | 75.5        | 89.1        | <i>23.6</i>  | <i>26.1</i> |
| Not using               | 20.2        | 20.6  | 32.4  | 50.2        | 47.5        | 54.6        | 20.8         | <i>22.5</i> |
| All                     | 20.4        | 23.5  | 41.1  | 57.2        | 54.8        | 68.8        | 20.8         | 22.5        |
| <b>Armenia 2015</b>     |             |       |       |             |             |             |              |             |
| Using                   | <i>33.7</i> | 56    | 76.7  | 78.3        | 95.5        | 91.4        | <i>23.6</i>  | <i>26.1</i> |
| Not using               | 13.7        | 18.7  | 27.8  | 32          | 29.8        | 53.5        | 32.3         | <i>22.5</i> |
| All                     | 14          | 22.5  | 34.9  | 41          | 43.8        | 67.4        | 32.3         | 22.9        |
| <b>Azerbaijan 2006</b>  |             |       |       |             |             |             |              |             |
| Using                   | 94.7        | 64.9  | 78.8  | 88.6        | 86.7        | 100         | <i>49.4</i>  | <i>66.1</i> |
| Not using               | 17.9        | 29.5  | 49.3  | 57          | 72.6        | 84.1        | 31           | 35.3        |
| All                     | 20.6        | 33.4  | 56.2  | 67.5        | 77.4        | 89.2        | 31           | 35.3        |
| <b>Kazakhstan 1999</b>  |             |       |       |             |             |             |              |             |
| Using                   | 46.7        | 59.1  | 80.5  | 86.3        | 92.7        | 84          | 79.1         | 88.9        |
| Not using               | 22.4        | 28.8  | 39.7  | 37.8        | 50.9        | 55.3        | 49.8         | 65.2        |
| All                     | 25.2        | 33.8  | 50.6  | 51.6        | 63.2        | 67          | 54           | 72.5        |
| <b>Kyrgyz Rep. 2012</b> |             |       |       |             |             |             |              |             |
| Using                   | <i>33.7</i> | 49.9  | 50.5  | 52.6        | 48          | <i>73.7</i> | <i>23.6</i>  | <i>26.1</i> |
| Not using               | 9.3         | 17.5  | 22.5  | 21.8        | 29.8        | 27.9        | 19.9         | 27.7        |
| All                     | 10          | 19    | 24.4  | 24.4        | 31.4        | 29.6        | 20.1         | 27.6        |
| <b>Moldova 2005</b>     |             |       |       |             |             |             |              |             |
| Using                   | 60.1        | 59.1  | 71.9  | 71.9        | 70.2        | 90          | 53.1         | 88.3        |
| Not using               | 25          | 26.9  | 31.5  | 34.3        | 66.8        | 74.7        | 43.8         | 65.3        |
| All                     | 32.4        | 34.8  | 44.1  | 48.2        | 68.3        | 80.5        | 45.1         | 70.3        |
| <b>Tajikistan 2012</b>  |             |       |       |             |             |             |              |             |
| Using                   | <i>33.7</i> | 26    | 52    | 67.3        | 65.6        | <i>73.7</i> | <i>23.6</i>  | <i>26.1</i> |
| Not using               | 12.1        | 10.7  | 15.1  | 19.2        | 27.9        | 41.1        | 14.7         | 25          |
| All                     | 12.1        | 10.8  | 16    | 20.4        | 29.4        | 42.9        | 14.7         | 25          |
| <b>Tajikistan 2017</b>  |             |       |       |             |             |             |              |             |
| Using                   | <i>13.9</i> | 21.7  | 41    | <i>23.2</i> | <i>25.8</i> | <i>30</i>   | <i>26.5</i>  | <i>30.1</i> |
| Not using               | 9.4         | 10.7  | 16    | 22.8        | 32.5        | 51.7        | 11.5         | 25.1        |
| All                     | 9.4         | 10.7  | 16.3  | 22.8        | 32.3        | 51.6        | 11.5         | 25.1        |
| <b>Turkey 1998</b>      |             |       |       |             |             |             |              |             |
| Using                   | 48          | 33.9  | 32.7  | 50          | 71.3        | 77.5        | <i>23.6</i>  | <i>26.1</i> |
| Not using               | 13.7        | 14.4  | 17.7  | 26.4        | 29.1        | 48.3        | <i>18.3</i>  | <i>22.5</i> |
| All                     | 17.6        | 17.7  | 21    | 32.9        | 43.9        | 61.4        | 18.3         | 22.5        |
| <b>Turkey 2003</b>      |             |       |       |             |             |             |              |             |
| Using                   | 18.6        | 21.8  | 29.3  | 50.6        | 57.5        | 52          | 23.6         | <i>26.1</i> |
| Not using               | 17.8        | 13.3  | 16.9  | 18          | 36.7        | 30.3        | <i>18.3</i>  | <i>22.5</i> |
| All                     | 17.9        | 15    | 20.3  | 29.9        | 46          | 41          |              | 22.5        |
| <b>Ukraine 2007</b>     |             |       |       |             |             |             |              |             |
| Using                   | <i>33.7</i> | 45.3  | 75.9  | 71.5        | 76.8        | 85.6        | 40.3         | <i>26.1</i> |
| Not using               | 13          | 15.9  | 27.1  | 28.9        | 42.3        | 53.8        | 12.5         | 41.9        |
| All                     | 15.4        | 21.2  | 39.6  | 41.2        | 57.4        | 68.2        | 20.6         | 39.1        |

|                            | In-union |       |       |       |       |       | Not-in-union |       |
|----------------------------|----------|-------|-------|-------|-------|-------|--------------|-------|
|                            | 15-19    | 20-24 | 25-29 | 30-34 | 35-39 | 40-49 | 15-24        | 25-49 |
| <b>Latin America</b>       |          |       |       |       |       |       |              |       |
| <b>Bolivia 1994</b>        |          |       |       |       |       |       |              |       |
| Using                      | 12.6     | 7.6   | 14.6  | 17.2  | 13.7  | 20    | 19.9         | 0     |
| Not using                  | 7.2      | 6.2   | 7.9   | 10    | 10.6  | 6.4   | 5.5          | 11.1  |
| All                        | 8.1      | 6.5   | 9.2   | 11.8  | 11.2  | 9.4   | 6.9          | 9.9   |
| <b>Bolivia 2008</b>        |          |       |       |       |       |       |              |       |
| Using                      | 8.7      | 13.9  | 15    | 16.6  | 18.8  | 24.3  | 13.3         | 18.6  |
| Not using                  | 9.6      | 10    | 10.8  | 14.4  | 16.7  | 17.5  | 10.2         | 16.8  |
| All                        | 9.4      | 11    | 11.8  | 15    | 17.3  | 19.1  | 10.8         | 17.3  |
| <b>Brazil 1996</b>         |          |       |       |       |       |       |              |       |
| Using                      | 20.4     | 20    | 10.5  | 11    | 24.8  | 33.5  | 20.6         | 13.8  |
| Not using                  | 9.7      | 9.1   | 11.9  | 11.1  | 20.7  | 30.3  | 14.3         | 17    |
| All                        | 10.9     | 11.1  | 11.6  | 11    | 21.6  | 31    | 15.6         | 16.2  |
| <b>Colombia 1990</b>       |          |       |       |       |       |       |              |       |
| Using                      | 7        | 16.8  | 16    | 25.1  | 10.8  | 26.2  | 21.5         | 6.7   |
| Not using                  | 11.6     | 10.3  | 10.2  | 13.6  | 19.2  | 35.1  | 5.5          | 14.5  |
| All                        | 11.1     | 11.4  | 11.6  | 16.3  | 16.7  | 32.4  | 7.5          | 13    |
| <b>Colombia 1995</b>       |          |       |       |       |       |       |              |       |
| Using                      | 18.6     | 14.9  | 15.2  | 15.6  | 9.6   | 26.1  | 7.7          | 15.5  |
| Not using                  | 8.6      | 9.9   | 9.5   | 11.1  | 9.3   | 23.9  | 7.1          | 14.9  |
| All                        | 10.2     | 11.2  | 11.1  | 12.6  | 9.4   | 24.7  | 7.2          | 15.1  |
| <b>Colombia 2000</b>       |          |       |       |       |       |       |              |       |
| Using                      | 8        | 14.8  | 12.9  | 15.2  | 25.8  | 29    | 19.2         | 24.5  |
| Not using                  | 8.6      | 14.2  | 16.4  | 16.5  | 21.1  | 25.6  | 13.4         | 18.4  |
| All                        | 8.5      | 14.4  | 15.2  | 16.1  | 23    | 26.9  | 15.4         | 20.5  |
| <b>Colombia 2005</b>       |          |       |       |       |       |       |              |       |
| Using                      | 18.3     | 21    | 16.6  | 21.6  | 33.1  | 19.3  | 20.4         | 27.5  |
| Not using                  | 10.4     | 13.8  | 14.3  | 17    | 20.6  | 29    | 18.8         | 22.3  |
| All                        | 12.1     | 15.6  | 15    | 18.4  | 24.8  | 25.5  | 19.3         | 23.8  |
| <b>Colombia 2010</b>       |          |       |       |       |       |       |              |       |
| Using                      | 13       | 22.1  | 17.3  | 27.4  | 22.3  | 32.9  | 20           | 21.4  |
| Not using                  | 11.7     | 16.1  | 15.1  | 19    | 25.2  | 35.1  | 15.3         | 16.8  |
| All                        | 12       | 17.3  | 15.6  | 20.8  | 24.5  | 34.5  | 16.4         | 17.8  |
| <b>Colombia 2015</b>       |          |       |       |       |       |       |              |       |
| Using                      | 11.5     | 16.6  | 25.1  | 21.2  | 19.5  | 16.6  | 19.6         | 17.1  |
| Not using                  | 7.8      | 12.3  | 15.7  | 13.7  | 21.6  | 37.1  | 14.7         | 14.7  |
| All                        | 8.5      | 13.2  | 17.7  | 14.8  | 21.1  | 32    | 15.9         | 15.2  |
| <b>Dominican Rep. 1991</b> |          |       |       |       |       |       |              |       |
| Using                      | 5.7      | 16.2  | 26.3  | 18.4  | 36.5  | 30    | 27           | 30.1  |
| Not using                  | 11       | 9.8   | 14.8  | 20.1  | 18    | 25.1  | 9.5          | 23    |
| All                        | 10.7     | 10.5  | 16.6  | 19.9  | 20.5  | 25.5  | 12.2         | 23.8  |
| <b>Dominican Rep. 1996</b> |          |       |       |       |       |       |              |       |
| Using                      | 14.9     | 15.8  | 16.7  | 20.5  | 25.8  | 30    | 22.8         | 41.7  |
| Not using                  | 16.2     | 12.6  | 18.2  | 14.2  | 24.1  | 19.4  | 24.3         | 22.8  |
| All                        | 16.1     | 13    | 18    | 15    | 24.2  | 20.2  | 24.1         | 27.3  |

|                            | In-union    |       |       |             |             |             | Not-in-union |             |
|----------------------------|-------------|-------|-------|-------------|-------------|-------------|--------------|-------------|
|                            | 15-19       | 20-24 | 25-29 | 30-34       | 35-39       | 40-49       | 15-24        | 25-49       |
| <b>Dominican Rep. 1999</b> |             |       |       |             |             |             |              |             |
| Using                      | <i>13.9</i> | 10.1  | 28.8  | <i>23.2</i> | <i>25.8</i> | <i>30</i>   | <i>26.5</i>  | <i>30.1</i> |
| Not using                  | 13.7        | 18.2  | 20.3  | 22.9        | 20.5        | <i>31.9</i> | 45.4         | 56.5        |
| All                        | 13.7        | 17.1  | 22    | 22.9        | 20.8        | 30.5        | 45           | 53.9        |
| <b>Dominican Rep. 2002</b> |             |       |       |             |             |             |              |             |
| Using                      | 18.1        | 21.1  | 14    | 25.5        | 26.9        | 50.9        | 35           | 21.5        |
| Not using                  | 11.7        | 12.3  | 13.8  | 16.8        | 14.3        | 40.5        | 26.5         | 29.6        |
| All                        | 12.4        | 13.7  | 13.8  | 17.9        | 15.9        | 41.7        | 27.5         | 28.6        |
| <b>Guatemala 1995</b>      |             |       |       |             |             |             |              |             |
| Using                      | 0           | 21.3  | 2.8   | 13.7        | 3.2         | 16.5        | <i>14.6</i>  | <i>21.3</i> |
| Not using                  | 4.8         | 4.9   | 5.3   | 6           | 7           | 15.3        | 4            | 8.3         |
| All                        | 4.7         | 5.6   | 5.2   | 6.3         | 6.8         | 15.3        | 4.5          | 8.5         |
| <b>Guatemala 1998</b>      |             |       |       |             |             |             |              |             |
| Using                      | 17.2        | 7     | 14.1  | 3.6         | 0.6         | <i>22.3</i> | <i>14.6</i>  | <i>21.3</i> |
| Not using                  | 6.3         | 3.2   | 6     | 6.5         | 4.5         | 13.3        | 5.6          | 6.5         |
| All                        | 6.7         | 3.4   | 6.9   | 6.3         | 4.3         | 13.6        | 6.3          | 9.4         |
| <b>Guatemala 2014</b>      |             |       |       |             |             |             |              |             |
| Using                      | 10.3        | 10.3  | 9.4   | 9.9         | 16.3        | 22.2        | 4.3          | 0           |
| Not using                  | 7.4         | 5.2   | 7.3   | 8.6         | 9.6         | 19.9        | 5.7          | 13.3        |
| All                        | 7.6         | 5.8   | 7.5   | 8.8         | 10.8        | 20.2        | 5.6          | 12.5        |
| <b>Guyana 2009</b>         |             |       |       |             |             |             |              |             |
| Using                      | <i>13.9</i> | 21    | 49    | 41          | 30.3        | <i>30</i>   | 23.7         | 43.6        |
| Not using                  | 9.8         | 16    | 19.3  | 21.8        | 32.8        | 53.3        | 17.3         | 22.5        |
| All                        | 10          | 16.8  | 24.1  | 24.8        | 32.5        | 52.4        | 17.9         | 26.9        |
| <b>Honduras 2005</b>       |             |       |       |             |             |             |              |             |
| Using                      | 3.9         | 11.5  | 15.1  | 8.4         | 20          | 16.9        | 16.1         | <i>21.3</i> |
| Not using                  | 6.5         | 6.6   | 6.7   | 9.2         | 14.1        | 26.1        | 7.3          | 14          |
| All                        | 6.3         | 7.4   | 8.1   | 9.1         | 15.2        | 24.5        | 8.6          | 14.9        |
| <b>Honduras 2011</b>       |             |       |       |             |             |             |              |             |
| Using                      | 13.9        | 12.4  | 13.1  | 14.1        | 17          | 47.3        | 10.6         | 11          |
| Not using                  | 8.6         | 7.6   | 9     | 10.4        | 14          | 26.7        | 5.6          | 8.5         |
| All                        | 9           | 8.1   | 9.5   | 10.9        | 14.4        | 29.5        | 6.3          | 8.8         |
| <b>Nicaragua 1998</b>      |             |       |       |             |             |             |              |             |
| Using                      | 13.3        | 15.9  | 13.5  | 5.4         | 7.2         | <i>22.3</i> | <i>14.6</i>  | <i>21.3</i> |
| Not using                  | 4.6         | 7.9   | 8.2   | 6.9         | 11.7        | 9.3         | 10.2         | 13.3        |
| All                        | 5.3         | 8.6   | 8.8   | 6.7         | 11.3        | 9.8         | 10.4         | 14.2        |
| <b>Peru 1991</b>           |             |       |       |             |             |             |              |             |
| Using                      | 6           | 5.5   | 13.1  | 13.1        | 21.6        | 26.7        | 15.3         | 16.2        |
| Not using                  | 4.9         | 6.7   | 8.9   | 11.4        | 13.5        | 13.9        | 7.6          | 12.4        |
| All                        | 5.1         | 6.4   | 10.2  | 12          | 16.2        | 18.6        | 9.3          | 13.2        |
| <b>Peru 1996</b>           |             |       |       |             |             |             |              |             |
| Using                      | 13.6        | 8.9   | 11.1  | 14.4        | 12.1        | 18.1        | 10.9         | 21.7        |
| Not using                  | 5.6         | 7.3   | 7.8   | 11.4        | 12.8        | 19.3        | 8            | 10.3        |
| All                        | 7.4         | 7.7   | 8.8   | 12.4        | 12.5        | 18.8        | 8.7          | 13.6        |
| <b>Peru 2000</b>           |             |       |       |             |             |             |              |             |



|                                 | In-union |       |       |       |       |       | Not-in-union |             |
|---------------------------------|----------|-------|-------|-------|-------|-------|--------------|-------------|
|                                 | 15-19    | 20-24 | 25-29 | 30-34 | 35-39 | 40-49 | 15-24        | 25-49       |
| Using                           | 8.9      | 6.4   | 15.1  | 12.8  | 17.8  | 21.6  | 13.4         | 24.7        |
| Not using                       | 7.3      | 6.9   | 7.8   | 10.9  | 12.7  | 12.1  | 8.4          | 13          |
| All                             | 7.5      | 6.8   | 9.6   | 11.5  | 14.3  | 15.3  | 9.6          | 15.8        |
| <b>Peru 2004</b>                |          |       |       |       |       |       |              |             |
| Using                           | 19.1     | 14.1  | 11.9  | 11.5  | 16.7  | 22.2  | 15.2         | 20.7        |
| Not using                       | 7        | 5.9   | 10    | 9.1   | 12    | 27.3  | 11.3         | 10.8        |
| All                             | 9.2      | 8     | 10.6  | 9.8   | 13.4  | 25.7  | 12.4         | 13.1        |
| <b>Peru 2007</b>                |          |       |       |       |       |       |              |             |
| Using                           | 8.8      | 11.7  | 17.8  | 16.2  | 17.9  | 23.8  | 22           | 28.8        |
| Not using                       | 11.4     | 11.1  | 11    | 11.3  | 16.5  | 31.8  | 9.3          | 9.6         |
| All                             | 10.8     | 11.3  | 13.2  | 12.7  | 17    | 29.2  | 13.7         | 14.9        |
| <b>Peru 2009</b>                |          |       |       |       |       |       |              |             |
| Using                           | 12.5     | 12.5  | 13.9  | 18.5  | 19.8  | 14.6  | 27           | 21.2        |
| Not using                       | 6.7      | 9.3   | 10.5  | 11.2  | 16    | 29.3  | 13           | 16.7        |
| All                             | 8.6      | 10.2  | 11.4  | 13.5  | 17.1  | 24.4  | 18.8         | 17.9        |
| <b>Peru 2010</b>                |          |       |       |       |       |       |              |             |
| Using                           | 12.2     | 14.4  | 20.2  | 19.1  | 25.4  | 29    | 21.3         | 47.4        |
| Not using                       | 9.3      | 9.9   | 10.8  | 13.2  | 17    | 29.4  | 13.5         | 17.3        |
| All                             | 10.1     | 11.2  | 13.5  | 15.1  | 19.7  | 29.3  | 16.5         | 26.1        |
| <b>Peru 2011</b>                |          |       |       |       |       |       |              |             |
| Using                           | 14.1     | 17    | 17.7  | 18.7  | 20.5  | 35.9  | 17.8         | 35.6        |
| Not using                       | 10.9     | 8.1   | 9.6   | 12.1  | 13.8  | 28.7  | 17.2         | 17.9        |
| All                             | 11.9     | 10.9  | 12    | 14.1  | 16.1  | 31.3  | 17.4         | 24          |
| <b>Paraguay 1990</b>            |          |       |       |       |       |       |              |             |
| Using                           | 9.7      | 20.5  | 17.3  | 17.5  | 19.5  | 34.5  | 26.9         | <i>21.3</i> |
| Not using                       | 9.1      | 6.5   | 10.2  | 9     | 14.4  | 15.7  | 4.6          | 10          |
| All                             | 9.2      | 8.8   | 11.4  | 10.4  | 15.3  | 18.2  | 6.4          | 11.1        |
| <b>South and Southeast Asia</b> |          |       |       |       |       |       |              |             |
| <b>India 2005</b>               |          |       |       |       |       |       |              |             |
| Using                           | 13.4     | 20.5  | 28.2  | 43.6  | 37    | 48.4  | <i>26.5</i>  | <i>30.1</i> |
| Not using                       | 12.2     | 10    | 11.1  | 14.9  | 17.3  | 9.9   | 12.4         | 53.4        |
| All                             | 12.2     | 10.4  | 11.9  | 16.9  | 19.2  | 13.6  | 12.4         | 53.4        |
| <b>Indonesia 2012</b>           |          |       |       |       |       |       |              |             |
| Using                           | 29.8     | 5.6   | 3.3   | 12.4  | 19.9  | 17.5  | <i>14.6</i>  | <i>21.3</i> |
| Not using                       | 10.2     | 8.1   | 9     | 11.7  | 15.6  | 21.1  | 5.2          | 9.7         |
| All                             | 10.5     | 7.9   | 8.7   | 11.7  | 16.2  | 20.6  | 5.3          | 9.8         |
| <b>Cambodia 2010</b>            |          |       |       |       |       |       |              |             |
| Using                           | 24       | 31.7  | 37.3  | 60.2  | 57.9  | 74.6  | <i>23.6</i>  | <i>26.1</i> |
| Not using                       | 16       | 14.3  | 16.8  | 21.8  | 32.7  | 43.9  | 16.8         | 13.6        |
| All                             | 16.1     | 14.7  | 18.3  | 25.4  | 35.4  | 47.7  | 17           | 14.2        |
| <b>Cambodia 2014</b>            |          |       |       |       |       |       |              |             |
| Using                           | 74.1     | 35.7  | 44.9  | 52    | 75.1  | 83.1  | <i>23.6</i>  | <i>26.1</i> |
| Not using                       | 15.4     | 15.8  | 19.7  | 21.1  | 31.5  | 55    | 24.9         | 17.7        |
| All                             | 16.8     | 16.9  | 22.5  | 25.4  | 39.3  | 59.4  | 24.9         | 18.4        |
| <b>Nepal 2011</b>               |          |       |       |       |       |       |              |             |

|                         | In-union    |            |            |             |             |             | Not-in-union |             |
|-------------------------|-------------|------------|------------|-------------|-------------|-------------|--------------|-------------|
|                         | 15-19       | 20-24      | 25-29      | 30-34       | 35-39       | 40-49       | 15-24        | 25-49       |
| Using                   | 32.1        | 17.7       | 48.5       | 63.5        | 35.6        | <i>30</i>   | <i>26.5</i>  | <i>30.1</i> |
| Not using               | 11.5        | 10.1       | 16.5       | 16.9        | 22.9        | 23.1        | 13.2         | <i>22.7</i> |
| All                     | 11.7        | 10.3       | 18.4       | 21          | 24.7        | 24.1        | 13.7         | 22.7        |
| <b>Nepal 2016</b>       |             |            |            |             |             |             |              |             |
| Using                   | 31.3        | 24.2       | 46         | 60.9        | 56.8        | 50          | <i>23.6</i>  | <i>26.1</i> |
| Not using               | 13.5        | 15.3       | 19         | 28.6        | 41.7        | 48          | 6.5          | <i>22.5</i> |
| All                     | 14          | 15.7       | 20.5       | 31.4        | 42.9        | 48.5        | 6.7          | 22.5        |
| <b>Philippines 1993</b> |             |            |            |             |             |             |              |             |
| Using                   | 13.9        | 7.9        | 12.8       | 10.3        | 12.4        | 27.1        | <i>14.6</i>  | <i>21.3</i> |
| Not using               | 9.3         | 7.5        | 8.3        | 8.1         | 13.4        | 22.1        | 8.8          | 3.8         |
| All                     | 9.5         | 7.5        | 8.9        | 8.4         | 13.3        | 22.9        | 8.8          | 4.1         |
| <b>Philippines 1998</b> |             |            |            |             |             |             |              |             |
| Using                   | 6.6         | 7.6        | 5.9        | 15.1        | 13.5        | 32.4        | 30.9         | <i>21.3</i> |
| Not using               | 14.2        | 7.6        | 8.6        | 10.3        | 16          | 24.9        | 7.7          | 2.7         |
| All                     | 13.5        | 7.6        | 7.9        | 11.4        | 15.4        | 26.3        | 9.6          | 3.5         |
| <b>Philippines 2003</b> |             |            |            |             |             |             |              |             |
| Using                   | 19.7        | 6          | 8.1        | 14.9        | 11.3        | 17.6        | 8.4          | <i>21.3</i> |
| Not using               | 9.6         | 9.2        | 8.5        | 9.8         | 13.6        | 26.7        | 5.8          | 5.5         |
| All                     | 10.4        | 8.8        | 8.4        | 10.7        | 13.2        | 25          | 5.9          | 6           |
| <b>Timor Leste 2009</b> |             |            |            |             |             |             |              |             |
| Using                   | <i>12.4</i> | <i>9.9</i> | <i>8.7</i> | 14.4        | <i>11.8</i> | <i>22.3</i> | <i>14.6</i>  | <i>21.3</i> |
| Not using               | 4.5         | 2          | 2.6        | 2.4         | 2.8         | 5.3         | 8            | 0           |
| All                     | 4.6         | 2.1        | 2.7        | 2.5         | 2.8         | 5.3         | 8            | 0           |
| <b>Timor Leste 2016</b> |             |            |            |             |             |             |              |             |
| Using                   | <i>12.4</i> | <i>9.9</i> | <i>8.7</i> | <i>10.8</i> | <i>11.8</i> | <i>22.3</i> | <i>14.6</i>  | <i>21.3</i> |
| Not using               | 5.2         | 3.8        | 2.9        | 2.7         | 4.7         | 3.6         | 2.7          | 2.9         |
| All                     | 5.2         | 3.8        | 2.9        | 2.7         | 4.8         | 3.7         | 2.7          | 2.9         |
| <b>Cluster means</b>    |             |            |            |             |             |             |              |             |
| <b>Cluster 1</b>        |             |            |            |             |             |             |              |             |
| Using                   | 12.4        | 9.9        | 8.7        | 10.8        | 11.8        | 22.3        | 14.6         | 21.3        |
| Not using               | 7.3         | 6.2        | 6.5        | 7.4         | 10.1        | 16          | 7.5          | 9.2         |
| <b>Cluster 2</b>        |             |            |            |             |             |             |              |             |
| Using                   | 13.9        | 18.1       | 23         | 23.2        | 25.8        | 30          | 26.5         | 30.1        |
| Not using               | 10.6        | 11.4       | 13.4       | 15.8        | 20.4        | 31.9        | 16.8         | 22.7        |
| <b>Cluster 3</b>        |             |            |            |             |             |             |              |             |
| Using                   | 33.7        | 37.4       | 51.4       | 61.6        | 68          | 73.7        | 23.6         | 26.1        |
| Not using               | 14.4        | 15.6       | 21.5       | 26.8        | 34.9        | 45.6        | 18.3         | 22.5        |
| <b>Cluster 4</b>        |             |            |            |             |             |             |              |             |
| Using                   | 61.9        | 64.6       | 80.6       | 86.3        | 86.5        | 89.1        | 49.4         | 66.1        |
| Not using               | 20.5        | 28         | 43.2       | 52.3        | 67.5        | 78.4        | 36.7         | 46.5        |

*Note:*

Values in italics correspond to imputed probabilities from the cluster means.
