# Supplementary material for: Reported patterns of pregnancy termination from Demographic and Health Surveys
Source: PubMed Central journal article supplement (PMC6699730; doi:10.1371/journal.pone.0221178), 2019-08-19
Supplement: pone.0221178.s008.pdf [file pone.0221178.s008.pdf]

| Code          | Survey            | Cluster | Probability PT (%) |     |      |                   |        |             |     |     |               |      |       |
|---------------|-------------------|---------|--------------------|-----|------|-------------------|--------|-------------|-----|-----|---------------|------|-------|
|               |                   |         | Model estimates    |     |      | Contraception (%) |        | Total rates |     |     | General rates |      |       |
|               |                   |         | T                  | IA  | ST   | Any               | Modern | TFR         | TTR | TPR | GFR           | GTR  | GPR   |
| <b>Africa</b> |                   |         |                    |     |      |                   |        |             |     |     |               |      |       |
| AO            | Angola 2015       | 1       | 6.7                | 1.6 | 5.1  | 13.3              | 12.5   | 6.2         | 0.5 | 6.7 | 216           | 15.4 | 231.4 |
| BF            | Burkina Faso 2010 | 1       | 5.0                | 1.1 | 3.9  | 15.3              | 14.3   | 6.0         | 0.3 | 6.3 | 206           | 10.8 | 216.8 |
| BJ            | Benin 2011        | 1       | 3.8                | 0.8 | 3.1  | 14.0              | 9.0    | 4.9         | 0.2 | 5.1 | 175           | 7.0  | 182.0 |
| BU            | Burundi 2010      | 1       | 7.3                | 1.8 | 5.5  | 13.4              | 11.0   | 6.4         | 0.6 | 7.0 | 203           | 16.0 | 219.0 |
| BU            | Burundi 2016      | 1       | 8.2                | 2.1 | 6.1  | 17.9              | 14.6   | 5.5         | 0.5 | 6.0 | 180           | 16.0 | 196.0 |
| ET            | Ethiopia 2005     | 1       | 4.3                | 0.9 | 3.4  | 10.3              | 9.7    | 5.4         | 0.3 | 5.7 | 179           | 8.1  | 187.1 |
| ET            | Ethiopia 2011     | 1       | 6.3                | 1.4 | 4.8  | 19.6              | 18.7   | 4.8         | 0.4 | 5.2 | 161           | 10.7 | 171.7 |
| ET            | Ethiopia 2016     | 1       | 5.3                | 1.2 | 4.1  | 25.3              | 24.9   | 4.6         | 0.3 | 4.9 | 156           | 8.7  | 164.7 |
| GH            | Ghana 2008        | 2       | 14.2               | 4.8 | 9.4  | 19.3              | 13.5   | 4.0         | 0.7 | 4.7 | 136           | 22.6 | 158.6 |
| GH            | Ghana 2014        | 2       | 18.2               | 7.2 | 10.9 | 22.8              | 18.2   | 4.2         | 0.9 | 5.1 | 143           | 31.7 | 174.7 |
| KE            | Kenya 1998        | 1       | 5.5                | 1.2 | 4.3  | 29.9              | 23.6   | 4.7         | 0.3 | 5.0 | 166           | 9.7  | 175.7 |
| KE            | Kenya 2003        | 1       | 5.6                | 1.2 | 4.3  | 28.4              | 22.7   | 4.9         | 0.3 | 5.2 | 171           | 10.1 | 181.1 |
| KE            | Kenya 2008        | 1       | 5.9                | 1.3 | 4.6  | 32.0              | 28.0   | 4.6         | 0.3 | 4.9 | 161           | 10.2 | 171.2 |
| KM            | Comoros 2012      | 1       | 7.6                | 1.9 | 5.7  | 13.7              | 9.9    | 4.3         | 0.4 | 4.7 | 142           | 11.7 | 153.7 |
| LB            | Liberia 2013      | 2       | 12.0               | 3.7 | 8.3  | 21.7              | 20.5   | 4.7         | 0.7 | 5.4 | 168           | 22.9 | 190.9 |
| LS            | Lesotho 2009      | 1       | 5.3                | 1.2 | 4.2  | 35.9              | 34.9   | 3.3         | 0.2 | 3.5 | 119           | 6.7  | 125.7 |
| LS            | Lesotho 2014      | 1       | 8.2                | 2.1 | 6.1  | 48.9              | 48.5   | 3.3         | 0.3 | 3.6 | 118           | 10.6 | 128.6 |
| MA            | Morocco 1992      | 1       | 8.5                | 2.2 | 6.3  | 22.9              | 19.7   | 4.0         | 0.4 | 4.4 | 127           | 11.8 | 138.8 |
| MA            | Morocco 2003      | 1       | 11.8               | 3.6 | 8.2  | 33.3              | 29.0   | 2.5         | 0.4 | 2.8 | 81            | 10.9 | 91.9  |
| MD            | Madagascar 2008   | 1       | 7.3                | 1.8 | 5.5  | 31.7              | 23.0   | 4.8         | 0.4 | 5.2 | 168           | 13.3 | 181.3 |
| ML            | Mali 2012         | 1       | 4.1                | 0.8 | 3.2  | 9.9               | 9.6    | 6.1         | 0.3 | 6.4 | 214           | 9.0  | 223.0 |
| MW            | Malawi 2004       | 1       | 4.9                | 1.1 | 3.9  | 25.7              | 22.4   | 6.0         | 0.3 | 6.3 | 215           | 11.2 | 226.2 |
| MW            | Malawi 2010       | 1       | 5.5                | 1.2 | 4.3  | 35.4              | 32.6   | 5.7         | 0.4 | 6.1 | 202           | 11.8 | 213.8 |
| MW            | Malawi 2015       | 1       | 5.7                | 1.3 | 4.4  | 46.0              | 45.2   | 4.4         | 0.3 | 4.7 | 158           | 9.5  | 167.5 |
| MZ            | Mozambique 2011   | 1       | 6.3                | 1.4 | 4.8  | 12.3              | 12.1   | 5.9         | 0.4 | 6.3 | 206           | 13.8 | 219.8 |
| NG            | Nigeria 2008      | 1       | 7.1                | 1.7 | 5.4  | 15.4              | 10.5   | 5.7         | 0.5 | 6.2 | 195           | 15.0 | 210.0 |
| NG            | Nigeria 2013      | 1       | 7.6                | 1.9 | 5.7  | 16.0              | 11.1   | 5.5         | 0.5 | 6.0 | 190           | 15.5 | 205.5 |

| Code                                      | Survey            | Cluster | Probability PT (%) |                 |     |                   |        |             |     |     |               |      |       |
|-------------------------------------------|-------------------|---------|--------------------|-----------------|-----|-------------------|--------|-------------|-----|-----|---------------|------|-------|
|                                           |                   |         | T                  | Model estimates |     | Contraception (%) |        | Total rates |     |     | General rates |      |       |
|                                           |                   |         |                    | IA              | ST  | Any               | Modern | TFR         | TTR | TPR | GFR           | GTR  | GPR   |
| NI                                        | Niger 2012        | 1       | 7.0                | 1.7             | 5.4 | 12.5              | 11.0   | 7.6         | 0.7 | 8.3 | 269           | 20.4 | 289.4 |
| NM                                        | Namibia 2006      | 1       | 5.3                | 1.2             | 4.1 | 46.6              | 45.7   | 3.6         | 0.2 | 3.8 | 122           | 6.8  | 128.8 |
| NM                                        | Namibia 2013      | 1       | 6.9                | 1.6             | 5.3 | 50.2              | 49.7   | 3.6         | 0.3 | 3.9 | 125           | 9.3  | 134.3 |
| RW                                        | Rwanda 2010       | 1       | 7.1                | 1.7             | 5.4 | 28.6              | 25.2   | 4.6         | 0.4 | 5.0 | 151           | 11.6 | 162.6 |
| RW                                        | Rwanda 2014       | 1       | 7.9                | 2               | 5.9 | 30.9              | 27.8   | 4.2         | 0.4 | 4.6 | 142           | 12.2 | 154.2 |
| SL                                        | Sierra Leone 2008 | 1       | 6.3                | 1.5             | 4.9 | 10.2              | 8.2    | 5.1         | 0.4 | 5.5 | 180           | 12.1 | 192.1 |
| SL                                        | Sierra Leone 2013 | 1       | 6.8                | 1.6             | 5.2 | 22.1              | 20.9   | 4.9         | 0.4 | 5.3 | 169           | 12.3 | 181.3 |
| SN                                        | Senegal 2012      | 1       | 9.3                | 2.5             | 6.8 | 12.6              | 11.4   | 5.3         | 0.6 | 5.9 | 172           | 17.6 | 189.6 |
| SN                                        | Senegal 2014      | 1       | 8.3                | 2.1             | 6.2 | 16.0              | 14.7   | 5.0         | 0.5 | 5.5 | 167           | 15.2 | 182.2 |
| SN                                        | Senegal 2015      | 1       | 9.1                | 2.4             | 6.7 | 16.9              | 15.3   | 4.9         | 0.6 | 5.5 | 161           | 16.1 | 177.1 |
| SN                                        | Senegal 2016      | 1       | 9.1                | 2.4             | 6.7 | 18.0              | 16.6   | 4.7         | 0.5 | 5.2 | 156           | 15.6 | 171.6 |
| SN                                        | Senegal 2017      | 1       | 10.3               | 2.9             | 7.4 | 19.9              | 18.9   | 4.6         | 0.6 | 5.2 | 152           | 17.5 | 169.5 |
| TZ                                        | Tanzania 2004     | 1       | 8.8                | 2.3             | 6.5 | 22.5              | 17.6   | 5.7         | 0.6 | 6.3 | 199           | 19.2 | 218.2 |
| TZ                                        | Tanzania 2010     | 1       | 8.1                | 2               | 6.0 | 28.8              | 23.6   | 5.4         | 0.5 | 5.9 | 188           | 16.5 | 204.5 |
| TZ                                        | Tanzania 2015     | 1       | 9.8                | 2.7             | 7.1 | 32.4              | 27.1   | 5.2         | 0.6 | 5.8 | 178           | 19.3 | 197.3 |
| UG                                        | Uganda 2006       | 1       | 9.7                | 2.7             | 7.1 | 19.6              | 15.4   | 6.7         | 0.8 | 7.5 | 230           | 24.7 | 254.7 |
| UG                                        | Uganda 2011       | 1       | 10.0               | 2.8             | 7.2 | 23.6              | 20.7   | 6.2         | 0.8 | 7.0 | 217           | 24.1 | 241.1 |
| UG                                        | Uganda 2016       | 2       | 10.9               | 3.2             | 7.8 | 30.3              | 27.3   | 5.4         | 0.7 | 6.1 | 189           | 23.2 | 212.2 |
| ZM                                        | Zambia 2007       | 1       | 6.2                | 1.4             | 4.8 | 29.9              | 24.6   | 6.2         | 0.4 | 6.6 | 214           | 14.2 | 228.2 |
| ZM                                        | Zambia 2013       | 1       | 5.6                | 1.3             | 4.4 | 35.1              | 32.5   | 5.3         | 0.3 | 5.6 | 184           | 11.0 | 195.0 |
| ZW                                        | Zimbabwe 1994     | 1       | 8.2                | 2.1             | 6.1 | 35.1              | 31.1   | 4.3         | 0.4 | 4.7 | 148           | 13.3 | 161.3 |
| ZW                                        | Zimbabwe 1999     | 1       | 8.2                | 2.1             | 6.1 | 37.7              | 35.6   | 4.0         | 0.4 | 4.4 | 141           | 12.5 | 153.5 |
| ZW                                        | Zimbabwe 2005     | 1       | 7.3                | 1.8             | 5.5 | 40.1              | 39.1   | 3.8         | 0.3 | 4.1 | 137           | 10.7 | 147.7 |
| ZW                                        | Zimbabwe 2010     | 1       | 7.0                | 1.7             | 5.3 | 41.3              | 40.5   | 4.1         | 0.3 | 4.4 | 150           | 11.3 | 161.3 |
| ZW                                        | Zimbabwe 2015     | 1       | 8.5                | 2.2             | 6.3 | 48.6              | 47.9   | 4.0         | 0.4 | 4.4 | 144           | 13.3 | 157.3 |
| <b>Central and West Asia &amp; Europe</b> |                   |         |                    |                 |     |                   |        |             |     |     |               |      |       |
| AL                                        | Albania 2008      | 2       | 16.0               | <b>7.2</b>      | 8.7 | 48.0              | 7.9    | 1.6         | 0.3 | 1.9 | 46            | 8.7  | 54.7  |
| AL                                        | Albania 2017      | 1       | 9.2                | 2.4             | 6.7 | 33.2              | 2.8    | 1.8         | 0.2 | 2.0 | 57            | 5.8  | 62.8  |
| AM                                        | Armenia 2000      | 4       | 62.8               | 58.5            | 4.4 | 39.0              | 14.4   | 1.7         | 3.1 | 4.8 | 56            | 94.7 | 150.7 |

| Code                 | Survey              | Cluster | Probability PT (%) |                 |      |                   |        |             |     |     |               |      |       |
|----------------------|---------------------|---------|--------------------|-----------------|------|-------------------|--------|-------------|-----|-----|---------------|------|-------|
|                      |                     |         | T                  | Model estimates |      | Contraception (%) |        | Total rates |     |     | General rates |      |       |
|                      |                     |         |                    | IA              | ST   | Any               | Modern | TFR         | TTR | TPR | GFR           | GTR  | GPR   |
| AM                   | Armenia 2005        | 4       | 51.9               | <b>44.8</b>     | 7.2  | 33.1              | 12.3   | 1.7         | 2.1 | 3.8 | 58            | 62.7 | 120.7 |
| AM                   | Armenia 2010        | 3       | 36.6               | <b>29.6</b>     | 7.0  | 33.9              | 16.9   | 1.7         | 1.1 | 2.8 | 61            | 35.2 | 96.2  |
| AM                   | Armenia 2015        | 3       | 32.4               | <b>22.2</b>     | 10.2 | 36.7              | 18.1   | 1.7         | 0.9 | 2.6 | 64            | 30.6 | 94.6  |
| AZ                   | Azerbaijan 2006     | 4       | 52.2               | <b>45.7</b>     | 6.5  | 32.0              | 9.0    | 2.0         | 2.4 | 4.4 | 66            | 72.1 | 138.1 |
| KK                   | Kazakhstan 1999     | 4       | 46.9               | 38.6            | 8.4  | 48.0              | 38.7   | 2.0         | 1.8 | 3.8 | 67            | 59.3 | 126.3 |
| KY                   | Kyrgyz Rep. 2012    | 3       | 22.4               | <b>12.3</b>     | 10.1 | 24.4              | 22.7   | 3.6         | 1.1 | 4.7 | 125           | 36.2 | 161.2 |
| MB                   | Moldova 2005        | 4       | 44.1               | <b>32.6</b>     | 11.5 | 49.8              | 32.8   | 1.7         | 1.4 | 3.1 | 55            | 43.4 | 98.4  |
| TJ                   | Tajikistan 2012     | 3       | 16.0               | <b>7.8</b>      | 8.2  | 18.9              | 17.5   | 3.8         | 0.8 | 4.6 | 134           | 25.4 | 159.4 |
| TJ                   | Tajikistan 2017     | 2       | 15.9               | <b>8.2</b>      | 7.7  | 21.3              | 19.7   | 3.8         | 0.8 | 4.6 | 141           | 26.6 | 167.6 |
| TR                   | Turkey 1998         | 3       | 24.5               | 12.4            | 12.1 | 44.2              | 26.1   | 2.6         | 1.0 | 3.6 | 94            | 30.6 | 124.6 |
| TR                   | Turkey 2003         | 3       | 23.0               | <b>11.2</b>     | 11.8 | 71.0              | 42.5   | 2.2         | 0.7 | 2.9 | 79            | 23.6 | 102.6 |
| UA                   | Ukraine 2007        | 3       | 34.0               | <b>25.9</b>     | 8.1  | 50.9              | 38.3   | 1.2         | 0.6 | 1.8 | 39            | 20.1 | 59.1  |
| <b>Latin America</b> |                     |         |                    |                 |      |                   |        |             |     |     |               |      |       |
| BO                   | Bolivia 1994        | 1       | 9.0                | 2.4             | 6.6  | 30.1              | 11.9   | 4.8         | 0.5 | 5.3 | 163           | 16.2 | 179.2 |
| BO                   | Bolivia 2008        | 1       | 12.9               | 4.1             | 8.8  | 41.3              | 24.0   | 3.5         | 0.6 | 4.0 | 121           | 18.0 | 139.0 |
| BR                   | Brazil 1996         | 2       | 13.5               | 4.4             | 9.1  | 55.4              | 51.0   | 2.5         | 0.4 | 2.9 | 89            | 13.9 | 102.9 |
| CO                   | Colombia 1990       | 2       | 12.5               | 3.9             | 8.6  | 39.9              | 33.0   | 2.8         | 0.4 | 3.2 | 105           | 15.0 | 120.0 |
| CO                   | Colombia 1995       | 1       | 11.3               | 3.3             | 8.0  | 48.1              | 39.5   | 3.0         | 0.4 | 3.4 | 107           | 13.6 | 120.6 |
| CO                   | Colombia 2000       | 2       | 15.7               | 5.7             | 10.1 | 52.8              | 43.8   | 2.6         | 0.5 | 3.1 | 92            | 17.2 | 109.2 |
| CO                   | Colombia 2005       | 2       | 17.8               | 7               | 10.8 | 56.4              | 49.4   | 2.4         | 0.5 | 2.9 | 84            | 18.2 | 102.2 |
| CO                   | Colombia 2010       | 2       | 17.8               | 7               | 10.8 | 61.2              | 56.9   | 2.1         | 0.5 | 2.6 | 74            | 16.0 | 90.0  |
| CO                   | Colombia 2015       | 2       | 15.4               | <b>3</b>        | 12.4 | 64.9              | 61.4   | 2.0         | 0.4 | 2.4 | 70            | 12.8 | 82.8  |
| DR                   | Dominican Rep. 1991 | 2       | 14.4               | 4.9             | 9.5  | 36.8              | 33.9   | 3.3         | 0.6 | 3.9 | 125           | 21.0 | 146.0 |
| DR                   | Dominican Rep. 1996 | 2       | 16.8               | 6.3             | 10.5 | 44.6              | 41.3   | 3.2         | 0.7 | 3.9 | 120           | 24.2 | 144.2 |
| DR                   | Dominican Rep. 1999 | 2       | 21.8               | 10              | 11.8 | 48.8              | 45.6   | 2.7         | 0.8 | 3.5 | 100           | 27.9 | 127.9 |
| DR                   | Dominican Rep. 2002 | 2       | 16.2               | 5.9             | 10.2 | 51.2              | 48.2   | 3.0         | 0.6 | 3.6 | 110           | 21.2 | 131.2 |
| GU                   | Guatemala 1995      | 1       | 6.0                | 1.3             | 4.6  | 21.4              | 18.4   | 5.1         | 0.4 | 5.4 | 177           | 11.2 | 188.2 |
| GU                   | Guatemala 1998      | 1       | 5.8                | 1.3             | 4.5  | 26.6              | 21.7   | 5.0         | 0.3 | 5.3 | 177           | 11.0 | 188.0 |
| GU                   | Guatemala 2014      | 1       | 7.8                | 2               | 5.9  | 39.4              | 32.2   | 3.1         | 0.3 | 3.4 | 112           | 9.5  | 121.5 |

| Code                            | Survey           | Cluster | Probability PT (%) |                 |      |                   |        |             |     |     |               |      |       |
|---------------------------------|------------------|---------|--------------------|-----------------|------|-------------------|--------|-------------|-----|-----|---------------|------|-------|
|                                 |                  |         | T                  | Model estimates |      | Contraception (%) |        | Total rates |     |     | General rates |      |       |
|                                 |                  |         |                    | IA              | ST   | Any               | Modern | TFR         | TTR | TPR | GFR           | GTR  | GPR   |
| GY                              | Guyana 2009      | 2       | 21.8               | 10              | 11.8 | 34.6              | 32.5   | 2.8         | 0.8 | 3.6 | 94            | 26.3 | 120.3 |
| HN                              | Honduras 2005    | 1       | 9.1                | 2.4             | 6.7  | 43.2              | 37.7   | 3.3         | 0.4 | 3.7 | 117           | 11.7 | 128.7 |
| HN                              | Honduras 2011    | 1       | 9.8                | 2.7             | 7.1  | 48.8              | 42.9   | 2.9         | 0.3 | 3.2 | 107           | 11.7 | 118.7 |
| NC                              | Nicaragua 1998   | 1       | 8.0                | 2               | 6.0  | 40.8              | 39.0   | 3.6         | 0.3 | 3.9 | 132           | 11.5 | 143.5 |
| PE                              | Peru 1991        | 1       | 10.2               | 2.9             | 7.4  | 35.7              | 19.9   | 3.5         | 0.4 | 4.0 | 121           | 13.8 | 134.8 |
| PE                              | Peru 1996        | 1       | 10.0               | 2.8             | 7.3  | 40.9              | 26.4   | 3.5         | 0.4 | 3.9 | 122           | 13.6 | 135.6 |
| PE                              | Peru 2000        | 1       | 10.3               | 2.9             | 7.4  | 44.0              | 32.0   | 2.8         | 0.3 | 3.1 | 98            | 11.2 | 109.2 |
| PE                              | Peru 2004        | 1       | 11.3               | 3.3             | 8.0  | 45.8              | 30.9   | 2.6         | 0.3 | 2.9 | 87            | 11.1 | 98.1  |
| PE                              | Peru 2007        | 2       | 14.0               | 4.7             | 9.3  | 48.0              | 33.0   | 2.5         | 0.4 | 2.9 | 85            | 13.8 | 98.8  |
| PE                              | Peru 2009        | 2       | 14.0               | 4.7             | 9.3  | 49.2              | 34.2   | 2.6         | 0.4 | 3.0 | 88            | 14.4 | 102.4 |
| PE                              | Peru 2010        | 2       | 15.8               | 5.7             | 10.1 | 50.1              | 34.7   | 2.5         | 0.5 | 3.0 | 86            | 16.1 | 102.1 |
| PE                              | Peru 2011        | 2       | 15.1               | 5.3             | 9.8  | 50.9              | 35.3   | 2.6         | 0.5 | 3.1 | 87            | 15.5 | 102.5 |
| PY                              | Paraguay 1990    | 1       | 10.9               | 3.2             | 7.8  | 32.7              | 23.6   | 4.7         | 0.6 | 5.3 | 160           | 19.6 | 179.6 |
| <b>South and Southeast Asia</b> |                  |         |                    |                 |      |                   |        |             |     |     |               |      |       |
| IA                              | India 2005       | 2       | 12.2               | 3.7             | 8.4  | 43.8              | 38.0   | 2.7         | 0.4 | 3.1 | 101           | 14.0 | 115.0 |
| ID                              | Indonesia 2012   | 1       | 10.6               | <b>0.2</b>      | 10.5 | 45.7              | 42.7   | 2.6         | 0.3 | 2.9 | 88            | 10.4 | 98.4  |
| KH                              | Cambodia 2010    | 3       | 21.6               | 9.8             | 11.8 | 31.4              | 21.7   | 3.0         | 0.9 | 3.9 | 105           | 28.9 | 133.9 |
| KH                              | Cambodia 2014    | 3       | 23.9               | 11.8            | 12.1 | 38.5              | 26.6   | 2.7         | 0.9 | 3.6 | 98            | 30.8 | 128.8 |
| NP                              | Nepal 2011       | 2       | 14.9               | <b>7.1</b>      | 7.8  | 38.2              | 33.2   | 2.6         | 0.5 | 3.1 | 96            | 16.8 | 112.8 |
| NP                              | Nepal 2016       | 3       | 19.8               | <b>8.9</b>      | 10.8 | 40.8              | 33.2   | 2.3         | 0.6 | 2.9 | 88            | 21.7 | 109.7 |
| PH                              | Philippines 1993 | 1       | 9.7                | 2.6             | 7.0  | 24.2              | 15.1   | 4.1         | 0.5 | 4.6 | 138           | 14.8 | 152.8 |
| PH                              | Philippines 1998 | 1       | 10.8               | 3.1             | 7.7  | 28.9              | 17.2   | 3.7         | 0.5 | 4.2 | 126           | 15.2 | 141.2 |
| PH                              | Philippines 2003 | 1       | 10.4               | <b>0.6</b>      | 9.8  | 31.6              | 21.6   | 3.5         | 0.4 | 3.9 | 119           | 13.8 | 132.8 |
| TL                              | Timor Leste 2009 | 1       | 2.9                | 0.6             | 2.4  | 13.6              | 12.8   | 5.7         | 0.2 | 5.9 | 175           | 5.3  | 180.3 |
| TL                              | Timor Leste 2016 | 1       | 3.4                | 0.7             | 2.7  | 16.1              | 14.8   | 4.2         | 0.2 | 4.4 | 136           | 4.8  | 140.8 |

*Note:*

Values in boldface correspond to induced abortion estimates from reported data.
